# Supplementary material for: The effects of pressure on X-ray fluorescence analyses: pXRF under high altitude conditions
Source: Royal Society of Chemistry journal article supplement (doi:10.1039/c8ja00029h), 2018-01-01
Supplement: c8ja00029h1.xlsx [file c8ja00029h1.xlsx]

## Sheet: Supplementary Material
Supplementary material for:
Merrill, J., Montenegro, V., Gazley M.F., and Voisin, L.
The effects of pressure on X-ray fluorescence analyses: pXRF in high altitude conditions

## Sheet: Fig 1
Table S1: Data for Figure 1
	Unit PC1		Unit PC2		Unit 1		Unit 2
Rep	Fe (wt%)	Fe +/-	Fe (wt%)	Fe +/-	Fe (wt%)	Fe +/-	Fe (wt%)	Fe +/-
1	5.8879	0.0305	3.69863	0.0117	4.07792	0.04169	3.89256	0.0328
2	5.8455	0.0304	3.72899	0.01178	4.10275	0.04183	3.88833	0.03258
3	5.8396	0.0303	3.64206	0.01151	4.06841	0.04162	3.87678	0.03245
4	5.7692	0.0298	3.78355	0.01205	4.09184	0.04176	3.87389	0.03203
5	5.8552	0.0304	3.59776	0.01134	4.08274	0.04169	3.84752	0.03236
6	5.8187	0.0302	3.64769	0.0115	4.07995	0.04169	3.82231	0.03175
7	5.8259	0.0302	3.59939	0.01138	4.07386	0.04169	3.85771	0.03226
8	5.838	0.0303	3.75166	0.01196	4.10429	0.04183	3.8638	0.03221
9	5.8779	0.0305	3.6814	0.01163	4.08323	0.04169	3.85135	0.03257
10	5.7635	0.0297	3.71967	0.0118	4.0768	0.04169	3.84499	0.03227
11	5.8475	0.0303	3.64552	0.01149	4.07561	0.04169	3.90505	0.03275
12	5.8872	0.0304	3.64358	0.01153	4.07113	0.04162	3.85054	0.03261
13	5.8112	0.03	3.65772	0.01154	4.09701	0.04183	3.87901	0.03236
14	5.8637	0.0304	3.67005	0.01152	4.10695	0.04183	3.87134	0.03247
15	5.8481	0.0303	3.74616	0.01188	4.05085	0.04155	3.8777	0.03212
16	5.8173	0.0301	3.65476	0.01152	4.03833	0.04141	3.88139	0.03265
17	5.8341	0.0302	3.67215	0.01159	4.09673	0.04176	3.87372	0.03234
18	5.815	0.0301	3.5812	0.01131	4.08149	0.04162	3.87038	0.0323
19	5.8416	0.0302	3.66026	0.01159	4.07806	0.04162	3.86183	0.03212
20	5.8194	0.0301	3.66722	0.0116	4.06722	0.04162	3.87246	0.03273
21	5.8076	0.03	3.65978	0.01447	4.08246	0.04162	3.87457	0.03215
22	5.8312	0.0301	3.73312	0.01185	4.06841	0.04169	3.86993	0.03155
23	5.8673	0.0305	3.58909	0.01129	4.08652	0.04169	3.86537	0.03222
24	5.8417	0.0302	3.67343	0.01157	4.09359	0.04176	3.87796	0.03256
25	5.8322	0.0302	3.73397	0.01182	4.08939	0.04169	3.8714	0.0327
26	5.798	0.0299	3.66311	0.01163	4.06813	0.04162	3.873	0.03212
27	5.803	0.03	3.71616	0.0118	4.05155	0.04148	3.83214	0.03172
28	5.8464	0.0302	3.67664	0.0116	4.05868	0.04155	3.85652	0.03267
29	5.8574	0.0304	3.64636	0.0115	4.03826	0.04141	3.87097	0.03247
30	5.8204	0.03	3.62221	0.01147	4.04903	0.04155

## Sheet: Fig 2
Table S2: Data for Figure 2
	Energy 1.72 keV								On-site		Hypobaric Chamber
	On-site		Hypobaric Chamber						Pressure (mbar)	Si conc (%)	Pressure (mbar)	Si conc (%)
	Pressure (mbar)	CPS	Pressure (mbar)	CPS					959	45.1267	953	45.3867
	959	2588.83	953	2802.56					947	44.365	841.667	45.2167
	947	2680.17	841.667	3232.56					936	45	729	44.96
	936	2736.84	729	3755.36					926	44.62	626.667	44.7033
	926	2844.06	626.667	4295.13					917.5	44.89	513	43.7433
	917.5	2874.57	513	4937.36					904	44.99
	904	2990.18							895	44.875
	895	3043.43							882	44.925
	882	3042.95							870.5	44.94
	870.5	3083.84							862.5	45.08
	862.5	3160.9							853.5	44.8
	853.5	3173.12							839	44.88
	839	3247.22							834.5	45.215
	834.5	3329.53							825.5	44.72
	825.5	3320.87							800.5	44.815
	800.5	3420.35							794.5	44.89
	794.5	3469.71							784	44.47
	784	3502.9							776	44.445
	776	3512.78							768.5	44.63
	768.5	3579.83							758	44.63
	758	3566.12							749.5	44.62
	749.5	3650.62							739.5	44.735
	739.5	3731.2							728	44.76
	728	3787.13							723.5	45.045
	723.5	3908.86							714	44.795
	714	3908.26

## Sheet: Fig 3
Table S3:										Table S3: Data for Figure 3
Hipobaric Chamber									On-Site
	Pressure (mbar)			Pressure (mbar)						Pressure (mbar)			Pressure (mbar)
	952			952	850.667	750	639			959			959	947	936	926	916	904	894	882	869	861.5	850.5	839	833	823	800	792.5	783	774.5	767	758	748	738	728	722	712.5
Energy (keV)	CPS		Energy (keV)	∆CPS	∆CPS	∆CPS	∆CPS		Energy (keV)	CPS		Energy (keV)	∆CPS	∆CPS	∆CPS	∆CPS	∆CPS	∆CPS	∆CPS	∆CPS	∆CPS	∆CPS	∆CPS	∆CPS	∆CPS	∆CPS	∆CPS	∆CPS	∆CPS	∆CPS	∆CPS	∆CPS	∆CPS	∆CPS	∆CPS	∆CPS	∆CPS
-0.01866	0		-0.01866	0	0	0	0		-0.01776	0		-0.01776	0	0	0	0	0	0	0	0	0	0	0	0	0	0	0	0	0	0	0	0	0	0	0	0	0
0.0014	0		0.0014	0	0	0	0		0.0023	0		0.0023	0	0	0	0	0	0	0	0	0	0	0	0	0	0	0	0	0	0	0	0.0219	0	0	0	0	0
0.02146	0		0.02146	0	0	0	0		0.02236	0		0.02236	0	0	0	0	0	0.02143	0	0	0	0	0	0	0	0	0	0	0	0	0	0	0	0	0	0	0
0.04152	0		0.04152	0	0	0	0		0.04242	0		0.04242	0	0	0	0	0	0	0.02155	0	0	0	0	0	0	0	0	0	0	0	0	0	0	0	0	0	0
0.06158	0		0.06158	0	0	0	0		0.06248	0		0.06248	0	0	0	0	0	0	0	0	0	0	0	0	0	0	0	0	0	0	0	0	0	0	0	0	0
0.08164	0		0.08164	0	0	0	0		0.08254	0		0.08254	0	0	0	0	0	0	0	0	0	0	0	0	0	0	0.02162	0	0	0	0	0	0	0	0	0	0
0.10171	0		0.10171	0	0	0	0		0.1026	0		0.1026	0	0	0	0	0	0	0	0	0	0	0	0	0	0	0	0	0	0	0	0	0	0	0	0	0
0.12177	0		0.12177	0	0	0	0		0.12266	0		0.12266	0	0	0	0	0	0	0	0	0	0	0	0	0	0	0	0	0	0	0	0	0	0	0	0.022	0
0.14183	0		0.14183	0	0	0	0		0.14272	0		0.14272	0	0	0	0	0	0	0	0	0	0	0	0	0	0	0	0	0	0	0	0	0	0	0	0	0
0.16189	0		0.16189	0	0	0	0		0.16278	0		0.16278	0	0	0	0	0	0	0	0	0	0	0	0	0	0	0	0	0	0	0	0	0	0	0	0	0
0.18195	0		0.18195	0	0	0	0		0.18284	0		0.18284	0	0	0	0	0	0	0	0	0	0	0	0	0	0	0	0	0	0	0	0	0	0	0	0	0
0.20201	0		0.20201	0	0	0	0		0.2029	0		0.2029	0	0	0	0	0	0	0	0	0	0	0	0	0	0	0	0	0	0	0	0	0	0	0	0	0
0.22207	0		0.22207	0	0	0	0		0.22296	0		0.22296	0	0	0	0	0	0	0	0	0	0.02172	0	0	0	0	0	0	0	0	0	0	0	0	0	0	0
0.24213	0		0.24213	0	0	0	0		0.24302	0		0.24302	0	0	0	0	0	0	0	0	0	0	0	0	0	0	0	0	0	0	0	0	0	0	0	0	0
0.26219	0		0.26219	0	0	0	0		0.26308	0		0.26308	0	0	0	0	0.02155	0	0	0	0	0	0	0	0	0	0	0	0	0	0	0	0	0	0	0	0
0.28225	0		0.28225	0	0.01452	0	0		0.28314	0		0.28314	0	0	0	0	0	0	0	0	0	0	0	0	0	0	0	0	0	0	0	0	0.02188	0	0	0	0
0.30232	0		0.30232	0	0	0	0		0.3032	0		0.3032	0	0	0	0	0	0	0	0	0	0	0	0	0	0	0	0	0	0.02179	0	0	0	0	0	0	0
0.32238	0		0.32238	0	0.01452	0	0		0.32326	0		0.32326	0	0	0	0	0.02155	0	0	0	0	0	0	0	0	0.02167	0	0	0	0	0	0	0	0.02192	0	0	0
0.34244	0		0.34244	0	0	0	0		0.34332	0		0.34332	0	0	0	0	0	0.02102	0	0.04302	0	0	0	0	0	0	0	0	0.02172	0	0.02183	0.02194	0	0.0219	0	0	0
0.3625	0		0.3625	0	0	0	0.01476		0.36338	0.02155		0.36338	0	-0.02155	-0.02155	-0.02155	-0.02155	-0.02155	-0.02155	-0.02155	-1.30918e-05	-0.02155	-0.02155	-0.02155	-9.5362e-05	-0.02155	6.84093e-05	-0.02155	-0.02155	-0.02155	-0.02155	-0.02155	-0.02155	-0.02155	-0.02155	-0.02155	0.000396821
0.38256	0.01454		0.38256	0	-1.27286e-05	-0.01454	0.000223902		0.38344	0		0.38344	0	0.02156	0	0.02138	0	0	0	0.02151	0.02154	0	0.02127	0	0	0	0.02162	0	0.02172	0	0	0.02194	0.02187	0.04381	0	0.022	0.02195
0.40262	0.0436		0.40262	0	-0.02906	-0.01435	-0.01409		0.4035	0.02159		0.4035	0	0.02153	-3.41487e-05	-0.02159	-0.02159	-0.000152042	-0.02159	0.02143	-4.28778e-05	0.000170959	-0.000349149	0.04343	-0.000128953	8.66455e-05	3.4818e-05	0.000224965	-0.02159	0.04378	0.000254214	0.06613	-0.02159	0.02223	0.000388118	-0.02159	0.00036323
0.42268	0.02907		0.42268	0	2.68486e-07	0.01482	0.01522		0.42356	0		0.42356	0	0.02156	0	0.02138	0.10774	0.02143	0.0431	0.04302	0.04308	0	0.0638	0	0	0.06503	0.02162	0.04363	0	0.04353	0.02183	0.0219	0	0.04383	0.06593	0.04405	0.06585
0.44274	0.08725		0.44274	0	-0.01457	-0.05802	-0.01342		0.44362	0		0.44362	0	0.02156	0.10775	0.06415	0.04309	0.02102	0.06465	0.04302	0.04308	0.10866	0.08498	0.02167	0.02145	0.02167	0.02162	0.06543	0.06515	0.17427	0.06551	0.13152	0.04375	0.0219	0.08792	0.04399	0.04404
0.4628	0.15995		0.4628	0	0.01443	-0.11606	-0.05664		0.46368	0.19414		0.46368	0	-0.08633	-0.02174	-0.10859	-0.04331	-0.06679	-0.00021189	-0.12962	-0.04336	-0.10716	-0.13043	-0.12913	-0.06543	-0.10744	-0.1509	-0.04145	-0.06386	-0.08524	-0.04128	-0.1503	-0.04099	0.02496	-0.12821	-0.06205	-0.04036
0.48286	0.29077		0.48286	0	0.05792	-0.01279	-0.0989		0.48374	0.15104		0.48374	0	-0.06481	0.04292	0.04143	0.02132	0.0402	0.15063	-0.065	0.02129	0.00122	-0.10856	0.02234	0.02058	-0.086	0.06518	0.13255	0.000968992	0.08853	-0.02001	-0.01948	0.06774	0.0462	0.0248	0.0251	0.06887
0.50293	0.30527		0.50293	0	-0.0728	-0.04195	0.07845		0.5038	0.43139		0.5038	0	-0.12956	-0.10813	-0.17476	-0.08664	-0.24057	-0.23747	-0.13028	-0.08673	-0.04006	-0.13373	-0.10631	-0.02378	-0.04122	-0.12869	-0.16962	-0.14905	0.02588	0.13639	-0.19025	-0.08135	-0.10273	-0.23359	0.0528	0.20625
0.52299	0.56698		0.52299	0	-0.000276457	0.29609	0.11199		0.52386	0.45298		0.52386	0	-0.0218	0.172	-0.04665	-0.02203	0.16193	0.04263	0.4719	-0.02214	0.04689	0.18454	-0.1279	0.12627	0.0239	0.10918	0.26691	0.11169	-0.06089	0.20213	0.33585	0.15956	0.11678	0.03055	0.36156	0.07498
0.54305	1.03217		0.54305	0	-0.24758	0.05022	-0.11706		0.54392	0.75499		0.54392	0	-0.06509	-0.000687655	-0.19897	-0.19471	-0.13841	-0.1732	-0.06671	-0.00102	0.20124	0.07384	0.04688	0.189	0.06869	0.08825	-0.14421	0.26566	-0.01452	-0.16539	0.25339	0.07635	-0.0977	0.30002	0.21349	0.2342
0.56311	0.88676		0.56311	0	-0.07304	0.09339	0.24972		0.56398	0.88451		0.56398	0	0.04257	0.14996	-0.02907	-0.21655	-0.0103	0.06361	-0.15321	0.02025	-0.03694	-0.22572	0.13408	0.03796	0.06927	0.34791	0.14074	0.30987	0.22606	0.20734	0.27722	0.18747	-0.03002	0.17046	0.14996	0.30257
0.58317	0.88683		0.58317	0	0.01404	0.22487	0.42678		0.58404	1.01386		0.58404	0	-0.32392	0.04215	0.03404	-0.06579	-0.12365	-0.02266	0.08308	-0.02295	-0.29637	-0.12135	0.0264	-0.263	-0.01674	-0.12738	-0.03222	0.15875	0.14033	0.31817	-0.0494	-0.09499	0.10352	0.0411	0.17469	0.1289
0.60323	0.9159		0.60323	0	0.10114	0.34228	0.16158		0.6041	0.88434		0.6041	0	0.23676	0.15012	-0.11445	-0.06554	0.07017	0.08529	-0.17455	-0.13038	0.18063	-0.03428	0.19926	0.03816	-0.03895	0.34808	0.22815	-0.01562	0.00854	0.01099	-0.00737	-0.11863	0.05788	0.1047	0.12813	0.03858
0.62329	1.20667		0.62329	0	-0.49478	0.05139	-0.0111		0.62416	0.97052		0.62416	0	-0.04341	-0.04381	-0.13648	-0.21638	-0.18497	-0.0655	0.21246	-0.10887	0.02922	0.02818	-0.01695	-0.13387	0.00493	-0.08404	0.12017	-0.23217	0.11824	-0.05334	0.34487	-0.13917	0.1907	0.04052	0.17421	0.19502
0.64335	0.77052		0.64335	0	0.26119	0.28275	0.45453		0.64422	0.81958		0.64422	0	0.30149	-0.17305	0.03584	-0.13011	0.02943	-0.0654	0.34189	0.34368	-0.08051	0.26432	0.13398	0.03853	-0.10427	0.0669	0.18385	0.15765	0.13866	0.11942	0.25443	0.18677	0.47311	0.21337	0.14876	0.36743
0.66341	1.06116		0.66341	0	-0.18928	0.29938	0.09011		0.66428	1.1648		0.66428	0	-0.12992	0.14983	-0.18107	-0.23819	-0.35865	-0.08739	-0.23993	0.21388	-0.03421	-0.42112	-0.18955	0.12237	-0.01596	-0.14859	-0.2704	0.05131	-0.09768	-0.20394	0.10659	-0.13652	0.25937	0.21983	0.0017	-0.04316
0.68347	1.10492		0.68347	0	0.01397	0.05071	0.23818		0.68434	0.84147		0.68434	0	-0.08689	0.04215	-0.00744	0.45136	0.41146	0.49449	0.27698	0.25716	0.22376	0.19996	0.58888	0.40286	0.11229	0.28285	0.0529	0.02725	0.33433	0.31593	0.29843	0.20865	0.4075	0.45534	0.47917	0.30212
0.70354	1.2938		0.70354	0	-0.17498	-0.26975	0.25595		0.7044	1.25101		0.7044	0	-0.21619	0.27913	-0.24586	-0.23833	-0.27339	-0.13053	-0.08954	-0.04467	0.16187	-0.18837	-0.14573	-0.19977	-0.21051	-0.12669	-0.24758	-0.20869	0.01201	0.32127	0.21749	-0.02586	0.23887	0.24356	0.13554	0.02366
0.7236	1.30827		0.7236	0	0.01396	0.05222	0.04958		0.72446	1.33729		0.72446	0	-0.10843	-0.30282	-0.26794	0.04177	0.06568	-0.28145	-0.26184	-0.04482	0.18438	-0.21091	-0.12365	-0.15737	-0.29684	-0.29946	-0.29025	0.11763	-0.07403	-0.11438	0.06578	0.32535	-0.06646	0.09131	0.04937	-0.19404
0.74366	1.52641		0.74366	0	-0.17533	-0.23904	-0.0947		0.74452	1.31584		0.74452	0	-0.23784	-0.10896	0.20258	-0.06604	-0.36216	0.10631	0.06074	-0.04488	0.22734	0.02283	0.30957	-0.0716	0.15817	0.21929	0.18935	0.00893	0.38274	0.03804	0.1967	0.08431	0.45889	-0.063	0.11485	0.02517
0.76372	1.67191		0.76372	0	-0.24807	0.0102	0.04017		0.76458	1.0571		0.76458	0	0.04245	0.25753	0.2474	0.14958	0.10967	0.21422	0.14739	0.25693	0.46457	0.26042	0.58997	0.42321	-0.14665	0.26181	0.31716	0.41958	0.33668	0.77726	0.45547	0.2118	0.67396	0.19574	0.37358	0.65739
0.78378	1.39566		0.78378	0	-0.13137	0.37466	0.3903		0.78464	1.48826		0.78464	0	-0.10843	-0.08743	-0.09819	0.21398	-0.30173	-0.30314	-0.1117	-0.38961	-0.07546	-0.000731221	-0.38298	0.20655	0.15916	-0.21259	-0.28847	-0.09841	0.10164	-0.1343	0.0023	-0.13182	0.0894	0.33601	0.47081	0.1608
0.80384	1.78815		0.80384	0	-0.34977	-0.29622	0.11584		0.8047	1.29439		0.8047	0	0.15012	0.17111	0.39514	0.08466	0.29689	0.38636	0.29726	-0.04497	0.22745	0.5755	0.52606	0.50763	0.11461	0.34885	0.16716	0.81203	0.62204	0.3216	0.30583	0.4777	0.26117	0.2881	0.42219	0.48623
0.8239	1.64268		0.8239	0	0.4497	0.62459	0.21706		0.82476	1.53117		0.82476	0	0.75413	0.86104	0.20111	0.75288	0.54851	0.19267	0.23255	0.08446	0.40301	0.46646	0.37597	0.29234	0.1596	0.63098	0.23577	0.7491	0.21108	0.6307	0.52971	0.35027	0.37507	0.84263	0.58191	0.55709
0.84396	2.80587		0.84396	0	-0.65546	-0.39209	-0.13433		0.84482	2.3298		0.84482	0	-0.19538	0.01927	-0.12706	0.23437	-0.33419	0.32062	0.07918	-0.39102	-0.04742	0.029	0.57426	0.18026	0.03293	0.22154	-0.14832	0.211	-0.19551	0.31251	0.41021	-0.09827	0.43099	0.21981	-0.17273	0.22023
0.86402	3.18367		0.86402	0	0.43404	0.40034	0.22586		0.86488	3.06293		0.86488	0	-0.2171	-0.19661	-0.21863	0.25535	0.01621	0.29856	0.46451	0.46991	0.19751	0.0611	0.51296	0.15498	0.21018	0.63434	-0.03082	0.41164	-0.16628	0.1908	0.24724	0.39371	0.57419	0.82722	0.3044	-0.05065
0.88408	4.39027		0.88408	0	0.43375	0.3199	0.76095		0.88494	4.8101		0.88494	0	0.27796	-0.15502	-0.74679	-0.17738	-0.75458	0.03816	-0.83096	-0.17858	-0.57179	-0.2194	-0.86578	-0.88423	-0.19295	-0.46418	-0.29464	-0.14116	-0.73743	-0.15875	-0.05302	-0.01886	-0.12142	-0.32627	-0.09992	-0.61156
0.90415	6.22217		0.90415	0	0.11281	-0.40037	-0.48056		0.905	5.80217		0.905	0	0.06206	-0.06952	-0.92622	-0.02734	-0.32476	0.42518	-0.20986	0.55268	0.34961	0.36086	-0.29746	-0.13837	0.44055	-0.07248	-0.13052	-0.00416	0.4698	-0.43019	0.51063	0.14847	0.50821	-0.10971	0.77898	-0.28534
0.92421	6.16413		0.92421	0	1.26075	1.07699	1.59956		0.92506	7.26922		0.92506	0	0.06112	-0.7176	-1.15288	-0.76193	-0.9684	-0.65402	-0.21432	-0.74205	-0.37857	-1.40373	-0.37751	-0.70463	-0.20265	-0.32872	-0.39783	-0.16781	-0.10434	-1.06747	-0.10154	0.32212	-0.10468	-0.78556	-0.48968	-0.12424
0.94427	7.57439		0.94427	0	-0.57097	-0.0259	0.70573		0.94512	6.98849		0.94512	0	-0.2402	-0.07052	0.04749	-0.26568	0.35174	-0.37328	-0.17019	-0.11669	0.20604	-0.4429	0.59674	0.00526	-0.00872	-0.06961	0.55917	0.61209	-0.32471	0.8948	0.66217	0.60308	-0.15245	1.29736	0.67118	0.24414
0.96433	6.13509		0.96433	0	0.31624	0.74017	0.55105		0.96518	5.75944		0.96518	0	0.1048	0.31806	0.39966	0.87717	0.82922	0.14465	0.26303	0.50921	1.54384	0.4459	0.61216	0.63357	0.93862	0.70539	0.8502	0.73379	0.31627	0.39874	0.68577	1.48196	1.05455	0.96603	1.23964	1.2312
0.98439	5.16096		0.98439	0	0.15709	0.73443	0.56589		0.98524	4.63768		0.98524	0	0.42874	0.14671	-0.23215	0.57676	0.17945	-0.15571	0.54592	0.20924	0.51411	0.31406	0.000148203	0.36093	0.2612	0.55148	0.55406	0.48736	1.11152	1.21466	0.6888	0.94096	0.92756	1.73621	1.59102	0.92492
1.00445	4.17234		1.00445	0	-0.22007	0.06994	0.19657		1.0053	3.62368		1.0053	0	0.01985	0.27713	0.52519	0.40578	0.68278	0.01792	0.57056	0.10306	1.22345	0.11644	0.92745	0.60252	0.5382	0.63575	-0.19888	0.67596	1.51613	1.09318	0.67317	0.81751	1.72225	0.46438	1.28429	1.58668
1.02451	4.17231		1.02451	0	-0.1765	-0.0468	-0.18717		1.02536	3.34312		1.02536	0	-0.04448	0.32061	0.37806	0.51378	0.01049	0.29842	0.27036	0.36207	0.89565	0.20612	0.23278	0.47561	0.7538	0.65685	0.64886	0.86981	0.33751	0.43474	0.58075	0.72606	0.49118	0.72297	1.01511	0.83333
1.04457	4.14327		1.04457	0	-0.00236	0.2305	0.34371		1.04542	4.01194		1.04542	0	-0.21741	-0.45597	0.15836	-0.26263	0.51054	0.18988	0.07474	0.01633	0.42206	0.36585	0.12742	0.4718	0.10666	0.57182	0.43816	0.30953	0.58279	0.28998	-0.06628	0.2542	0.85235	0.3618	0.47839	0.25286
1.06463	4.56477		1.06463	0	0.02643	0.13089	0.18779		1.06548	3.99065		1.06548	0	0.25659	0.12566	0.17962	0.18951	0.21574	0.4051	0.71979	0.72697	0.4	0.4086	0.17038	-0.3436	0.19291	0.00932	0.67756	-0.19032	0.84401	0.20203	-0.15458	0.93184	1.07053	0.14138	0.93963	0.42835
1.08469	4.68116		1.08469	0	-0.3367	0.67272	0.47007		1.08554	4.27047		1.08554	0	-0.08786	0.49233	0.17779	0.16827	-0.4041	-0.30565	-0.14075	0.46872	0.03341	0.29851	0.21565	0.47069	0.52011	0.42139	0.33223	0.00768	0.34648	1.18904	0.83715	0.56446	0.65935	0.69675	-0.17638	0.56599
1.10476	4.53574		1.10476	0	-0.03116	-0.1763	0.32021		1.1056	4.44346		1.1056	0	0.40751	-0.19787	0.3256	-0.371	-0.51237	-0.00458	-0.3998	0.18802	0.33882	-0.06554	-0.21741	0.29763	-0.15164	0.33488	-0.12428	0.11685	-0.10974	-0.33807	-0.10367	-0.30861	0.07	0.19413	-0.45962	0.0409
1.12482	4.2306		1.12482	0	0.28828	-0.09059	0.16777		1.12566	4.44336		1.12566	0	-0.6273	-0.67186	-0.27312	-0.65092	-0.30545	-0.30615	-0.07707	-0.56588	-0.53091	-0.27798	0.2378	-0.13121	0.58568	0.16201	-0.23329	-0.96893	0.544	0.4701	0.15983	-0.00226	-0.56525	-0.13547	0.06887	-0.44251
1.14488	4.60858		1.14488	0	0.01187	-0.49805	-0.2692		1.14572	4.14102		1.14572	0	-0.66987	0.29856	0.52116	0.10383	0.68363	-0.02536	0.59091	0.1458	0.37984	0.23674	0.75687	0.38549	0.30268	0.01031	0.48356	0.24565	0.14908	0.13905	0.41802	0.03758	0.50384	0.43071	0.04074	0.01403
1.16494	4.56489		1.16494	0	0.12831	-0.57094	0.76339		1.16578	4.63761		1.16578	0	0.04083	-0.39199	0.43082	-0.22045	-0.11346	0.12447	-0.65849	0.4247	0.10112	-0.47234	0.62871	0.76857	0.21799	0.03263	-0.58029	0.22675	0.19701	-0.24826	0.03148	-0.02148	0.24847	-0.57154	0.1385	0.37479
1.185	4.95751		1.185	0	0.85425	0.47001	0.73967		1.18584	5.67306		1.18584	0	-0.08912	-0.50074	-0.43352	-0.26474	-0.66469	-0.78168	-0.29584	-0.41688	-0.36944	0.19234	-0.99189	-1.21082	-0.70902	-0.39742	-0.80857	-0.41777	-0.18502	-0.5413	-0.74088	-0.20363	-0.17359	-0.09049	0.20342	-0.30912
1.20506	5.98941		1.20506	0	-0.54049	-1.26449	-0.72009		1.2059	5.19846		1.2059	0	0.12678	0.49106	0.06242	0.1238	-0.00471	0.51172	0.07121	-0.04998	0.51801	0.30591	0.52297	0.35787	0.37242	-0.35524	0.42957	0.44771	-0.18931	0.17357	0.34761	-0.05732	0.14783	-0.03345	0.43627	0.31934
1.22512	4.92825		1.22512	0	0.04122	0.08942	1.18236		1.22596	5.30602		1.22596	0	-0.49827	-0.62942	-0.23754	-0.54408	-0.04128	-1.03954	-0.8967	0.46721	-0.08935	-0.50286	-0.06137	-0.52195	-0.92742	-0.16011	-0.33239	0.25324	0.16008	-0.39264	-0.06599	-0.14297	0.08397	0.25462	0.06458	0.1462
1.24518	4.31773		1.24518	0	0.5498	0.80205	0.71524		1.24602	4.24909		1.24602	0	-0.15278	0.0612	0.60548	0.31886	-0.04896	0.0174	0.07418	0.9209	-0.05412	-0.16863	-0.34811	-0.15152	0.10795	0.05359	-0.14808	0.5936	0.7162	0.57691	0.11335	0.52016	0.37412	1.31154	0.24087	0.74116
1.26524	3.31452		1.26524	0	0.52146	0.95687	1.34961		1.26608	3.27853		1.26608	0	0.02007	0.27742	0.63505	0.01821	-0.17586	1.11722	0.65757	0.25433	0.1125	0.27039	0.68746	-0.29657	0.2331	0.61333	0.69161	0.15253	0.85935	1.06705	0.44792	0.63759	0.64331	0.78762	0.50701	1.33843
1.2853	3.11105		1.2853	0	-0.26321	0.31205	0.41656		1.28614	2.93321		1.28614	0	-0.02262	-0.34707	-0.19583	-0.4553	-0.04739	-0.41212	0.25008	-0.0251	0.32719	0.02035	0.27425	0.15602	-0.63555	0.15866	0.2298	-0.06661	0.35524	0.60443	0.09201	0.23901	0.50682	0.34161	0.5886	0.4741
1.30537	2.77659		1.30537	0	-0.65512	0.10517	1.28236		1.3062	2.5454		1.3062	0	-0.13074	0.12697	-0.23575	0.23426	-0.12444	0.04038	0.35829	-0.06809	0.14961	0.19625	0.42367	0.37215	-0.20438	0.48161	-0.015	0.21253	0.37289	0.38084	0.41405	0.38614	0.10578	0.07006	0.82214	0.86171
1.32543	2.48604		1.32543	0	0.10041	0.73233	0.9826		1.32626	2.76119		1.32626	0	-0.66993	-0.11039	0.27557	-0.26169	-0.6605	-0.39092	-0.35221	0.10391	-0.34819	-0.78469	-0.44228	-0.03662	0.12182	-0.145	0.33643	0.34415	0.06996	-0.07515	0.15433	-0.26717	0.08723	0.11802	0.14411	0.58096
1.34549	3.50335		1.34549	0	0.11442	0.35866	1.27881		1.34632	2.80406		1.34632	0	0.58079	0.55794	0.48942	0.06179	0.31712	0.49278	0.37924	0.47028	0.43441	0.31983	0.8802	1.05745	0.49073	0.33105	0.83888	1.06142	1.57319	1.01747	1.29528	1.52761	1.29318	1.41577	1.11383	1.6814
1.36555	5.74257		1.36555	0	1.02851	1.13271	1.81448		1.36638	5.02586		1.36638	0	0.23466	-0.54317	-0.21414	0.18866	0.07325	0.83516	0.56643	1.15658	0.86483	0.13819	0.56553	0.42331	1.43367	1.09301	1.36569	1.27176	1.76878	1.43801	2.51429	2.10609	2.2483	2.22712	2.5234	1.83321
1.38561	10.002		1.38561	0	1.60742	3.58789	5.68765		1.38644	8.58499		1.38644	0	0.16822	0.61744	-0.22313	0.37887	0.32551	1.62871	1.13699	2.59521	3.04384	1.70024	1.73093	2.14178	1.7548	3.02575	4.13256	2.98982	3.56686	4.36467	3.90909	4.95711	5.10896	4.82219	4.68707	5.66147
1.40567	18.5649		1.40567	0	2.34391	7.05016	11.6925		1.4065	16.5878		1.4065	0	0.78921	-0.05795	-1.10461	1.33965	-0.04506	3.23625	2.21088	1.80879	4.40841	-0.20292	2.50533	1.66907	4.65512	4.53638	5.61876	6.51811	5.34276	6.25402	7.54724	6.93055	7.4265	10.6	11.1009	8.14543
1.42573	29.7588		1.42573	0	6.34706	12.3857	19.9081		1.42656	25.9469		1.42656	0	0.61492	1.72498	0.01542	1.00893	1.25977	3.65985	4.12239	3.99616	5.85329	2.38148	7.83988	4.40916	8.04163	8.60421	10.5261	11.9694	12.3169	12.2683	14.3434	14.4169	13.7549	15.9008	16.9953	17.955
1.44579	45.1101		1.44579	0	3.82742	14.1651	26.1798		1.44662	36.8209		1.44662	0	1.08127	1.51881	-0.89291	2.84767	-0.12208	6.10236	6.32573	6.17635	7.02129	1.96324	12.3314	6.81479	12.06	11.7193	16.0561	13.5393	13.3332	17.0519	18.3751	18.332	21.7459	23.6206	24.8089	25.3542
1.46585	51.5642		1.46585	0	8.58942	18.8421	32.4485		1.46668	44.3698		1.46668	0	0.62511	4.14214	-0.91363	3.5732	-1.55056	3.63875	7.35886	4.80997	9.70976	2.68123	10.5906	6.49531	11.3608	11.7163	17.0149	15.5891	17.5454	19.2862	20.0112	20.9342	24.9332	26.7315	27.7369	28.7911
1.48591	52.263		1.48591	0	7.20839	18.4658	32.0014		1.48674	41.9317		1.48674	0	1.89914	5.8259	2.52955	5.12813	-0.19719	7.49915	8.74307	8.92831	12.4526	3.48347	11.36	10.1568	14.5577	16.1004	18.7987	19.0469	21.7039	22.4667	24.0497	25.5819	27.2614	29.5002	30.0661	30.859
1.50598	44.1514		1.50598	0	5.46881	16.8486	27.6848		1.5068	37.6617		1.5068	0	0.28356	1.84185	-0.08661	3.73086	1.07351	5.67104	7.46376	5.27083	7.70229	4.22635	10.732	7.6689	11.0019	11.9163	16.5461	15.7822	16.239	16.8659	19.0907	19.2197	21.0803	23.3296	23.9232	24.1144
1.52604	33.9165		1.52604	0	5.82333	11.3291	18.1708		1.52686	30.1549		1.52686	0	-0.9847	0.23243	-0.83491	0.70116	-2.36269	3.0288	2.23734	3.10559	5.2757	1.3604	5.90744	3.7196	4.74441	8.02863	8.32514	7.97905	10.569	11.4891	12.2828	11.8278	12.5481	16.2424	15.9568	14.8694
1.5461	24.4092		1.5461	0	2.09323	5.69646	10.2614		1.54692	20.7288		1.54692	0	1.0897	1.74921	-0.62601	1.33596	-0.48191	1.5948	2.58679	3.41954	5.0735	1.43664	5.16938	1.90406	4.09094	5.43323	7.43321	6.80731	7.69165	7.4851	8.55639	7.79956	10.7787	10.5912	11.3614	11.4784
1.56616	18.8846		1.56616	0	3.0986	4.55045	8.52428		1.56698	17.4283		1.56698	0	-0.59023	0.69632	-0.04172	0.93018	-0.93096	1.40453	0.27344	1.87304	3.24283	-0.34193	2.44496	0.09895	2.70894	2.22559	4.56014	3.39791	3.54338	4.56188	4.75484	6.57118	5.18335	6.94605	7.81788	6.11789
1.58622	22.2278		1.58622	0	0.83067	4.07503	6.99656		1.58704	19.78		1.58704	0	-0.59187	0.71528	-1.25986	0.15156	-1.09581	0.23796	1.10503	1.63234	2.369	0.62161	2.67227	1.24394	3.5873	1.56038	5.3497	3.54288	4.95945	5.63864	6.5473	6.18846	5.85496	7.51757	7.93061	8.88676
1.60628	39.9353		1.60628	0	3.01568	8.85212	17.3921		1.6071	34.8352		1.6071	0	1.83776	0.33654	-0.91724	1.45069	-0.10498	2.50726	2.69763	2.2382	6.66072	1.50518	4.95475	3.75903	6.95716	6.87265	11.7378	9.3575	11.247	11.8095	14.6394	13.5357	13.3243	17.0349	16.7788	16.521
1.62634	88.5051		1.62634	0	8.29243	23.872	42.5619		1.62716	80.2176		1.62716	0	-1.00694	0.44893	-2.11669	2.95553	-4.71512	4.18547	6.76397	6.48802	13.379	-0.37503	13.6442	4.65086	17.9555	14.0737	23.028	19.9374	23.5746	27.8773	29.0091	29.0822	33.8048	34.6437	40.9478	38.8916
1.6464	191.229		1.6464	0	18.3196	55.1461	91.4812		1.64722	168.783		1.64722	0	-1.02683	8.43354	-3.40582	11.1389	-9.74876	12.6715	14.5149	19.815	30.5633	7.99009	31.8789	20.1551	36.9054	32.7293	49.9246	47.3582	51.6956	64.5714	68.6381	70.534	74.1583	81.6442	84.9077	89.6425
1.66646	362.438		1.66646	0	38.0443	92.835	164.532		1.66728	314.812		1.66728	0	4.22831	11.238	-6.02125	21.2205	-16.6694	26.2476	31.071	29.8129	60.4637	9.1274	69.3258	38.1576	72.3539	62.8288	101.705	89.1299	102.43	119.686	126.536	122.888	137.812	158.237	159.577	160.122
1.68652	564.805		1.68652	0	65.6894	162.193	265.48		1.68734	492.272		1.68734	0	7.56851	24.2918	-12.5859	37.8167	-13.6268	48.7738	55.1489	56.0736	94.0678	15.3887	108.674	61.586	118.791	113.498	156.542	141.191	166.748	184.817	207.346	218.131	231.496	253.908	264.218	271.316
1.70659	754.639		1.70659	0	75.829	209.501	352.494		1.7074	656.74		1.7074	0	-3.30807	21.0485	-17.6234	44.7801	-19.6441	65.8894	66.8803	64.4124	124.635	20.3825	133.121	78.9964	144.729	143.428	209.472	184.219	216.659	240.49	268.649	273.093	296.034	325.646	359.254	342.687
1.72665	832.592		1.72665	0	90.8067	233.512	386.468		1.72746	728.974		1.72746	0	-6.07682	20.3646	-29.5929	46.2839	-34.5799	67.1546	69.7763	70.5039	142.494	16.6995	156.266	80.0679	156.924	159.366	233.286	207.601	241.288	264.888	294.362	297.447	323.93	358.932	382.498	377.448
1.74671	770.876		1.74671	0	81.5869	213.627	353.042		1.74752	669.89		1.74752	0	1.45751	16.9285	-22.7539	41.7582	-30.0259	64.7843	69.4103	75.7563	124.681	16.8745	140.277	85.0269	150.893	141.953	213.163	192.613	225.112	253.567	282.377	280.026	314.698	335.839	360.805	355.865
1.76677	594.475		1.76677	0	61.4852	167.004	274.334		1.76758	515.884		1.76758	0	8.0377	26.0877	-18.6622	33.4895	-18.6818	50.4801	51.9266	64.192	97.7702	14.4957	111.068	66.678	120.54	121.063	178.041	157.794	178.458	188.961	219.674	219.918	242.085	262.077	281.413	277.627
1.78683	398.697		1.78683	0	39.5209	105.039	175.83		1.78764	340.027		1.78764	0	8.76552	12.4444	-4.4192	24.9435	-5.3693	35.7026	33.5807	38.9132	69.3526	6.56433	76.662	47.3952	80.7365	83.5808	118.089	106.13	117.456	123.58	152.327	149.196	157.077	180.211	189.718	181.087
1.80689	231.644		1.80689	0	24.0688	66.5738	103.757		1.8077	200.99		1.8077	0	0.78711	5.47101	-7.74713	12.8897	-9.30463	19.983	22.5076	24.9393	38.9796	8.42231	40.7618	25.4915	45.3418	46.2296	69.133	62.2751	65.8287	72.3037	89.3259	84.8594	90.2862	102.779	110.346	105.366
1.82695	128.993		1.82695	0	13.7323	33.9252	52.0361		1.82776	114.881		1.82776	0	-2.87842	0.91412	-5.59944	2.94078	-6.88531	5.83018	7.24585	11.5475	16.0151	-0.39881	22.0432	6.88764	19.9257	20.5127	34.5887	30.6601	33.7307	39.9234	39.1539	41.7612	48.3725	53.8056	55.7206	56.2449
1.84701	72.5432		1.84701	0	6.92029	17.7886	30.8195		1.84782	65.6808		1.84782	0	-0.57045	2.18418	-5.17984	1.11661	-4.91078	2.5828	5.59935	5.57921	10.1774	-1.94751	10.9084	6.40178	11.6828	11.6808	18.0196	16.0589	20.7994	20.2054	22.1111	24.7604	27.5257	29.5313	29.2937	32.1322
1.86707	45.4158		1.86707	0	4.14526	9.82171	17.5051		1.86788	41.9533		1.86788	0	0.04514	0.33046	-3.00943	2.90866	-1.64112	1.57333	1.98919	2.31505	5.82363	-0.19406	6.18044	2.39049	5.6916	6.58693	8.28432	6.58162	10.5308	12.6837	13.9437	14.0308	13.4795	16.8838	17.6514	18.482
1.88713	34.3668		1.88713	0	1.60915	6.50623	11.6098		1.88794	31.7293		1.88794	0	-2.30022	-0.30752	-1.01902	1.17373	-2.47484	0.93724	2.62021	0.43258	3.37527	1.27507	3.83458	1.09394	3.99355	4.46503	5.24539	6.25201	7.38372	7.68701	7.39978	9.09403	10.6671	10.0085	11.081	9.79999
1.9072	29.0175		1.9072	0	2.96235	7.55462	11.5425		1.908	27.7387		1.908	0	1.53936	1.63567	0.64039	0.96248	1.36824	3.22558	3.27698	2.63514	3.32082	-0.17522	2.88395	3.79753	5.33961	4.69353	5.8331	5.09623	6.58299	7.3756	7.04883	7.04642	8.61081	9.29541	8.84284	11.2599
1.92726	30.5436		1.92726	0	3.16448	5.63315	11.2858		1.92806	29.9811		1.92806	0	0.89253	0.81564	-0.04091	0.63763	-1.64121	1.67274	2.56172	3.71012	3.31879	1.95892	4.30414	2.32765	2.55547	3.66191	6.05551	6.7847	6.71507	5.72305	5.31142	6.68543	7.77058	7.90999	8.71256	8.22751
1.94732	34.3234		1.94732	0	3.43986	9.05028	11.5057		1.94812	33.5636		1.94812	0	-0.29711	2.10378	-1.14264	-0.10041	-0.24266	3.34785	4.70047	1.89393	4.19262	1.86238	3.71232	0.99753	5.28085	4.38206	7.35943	5.5038	6.83402	8.27705	7.38338	7.69694	7.97868	9.99811	10.1929	10.8009
1.96738	39.0779		1.96738	0	2.62323	9.25527	14.4708		1.96818	36.5167		1.96818	0	-0.42569	0.78867	0.28846	2.76421	0.6748	4.16571	5.12429	3.37865	6.78049	3.03237	5.54881	3.62217	5.38387	8.95325	9.20539	9.0878	8.60655	7.92227	9.8205	8.33186	10.6347	12.4301	11.3121	14.311
1.98744	40.4439		1.98744	0	3.69827	11.2241	17.341		1.98824	38.7181		1.98824	0	-0.85936	1.88454	-0.41612	1.96354	1.35289	1.33946	3.18107	3.30987	4.97255	2.25472	6.51158	5.3251	6.17418	7.61676	8.33471	7.90649	7.53775	9.56416	10.0998	10.5062	9.92346	9.83309	11.8598	13.7389
2.0075	39.1501		2.0075	0	3.40821	9.30001	17.705		2.0083	36.6477		2.0083	0	0.88772	0.24814	1.3549	0.28481	2.14017	5.99564	5.55261	4.82009	5.04315	4.62216	4.11752	6.58073	5.53483	10.6385	8.37649	8.36974	9.34644	11.6998	11.7525	11.4169	10.2408	12.1679	12.8751	12.7082
2.02756	34.8902		2.02756	0	3.19278	7.5331	14.0683		2.02836	32.4417		2.02836	0	-0.77074	1.50168	0.74935	3.41313	2.28394	3.02618	5.5428	4.61026	5.85856	4.09015	4.35752	3.90019	7.05324	7.6878	9.65953	8.18938	10.3294	8.72169	10.763	10.4597	11.0292	12.7463	12.7887	11.9231
2.04762	30.2673		2.04762	0	1.4222	4.79747	10.1896		2.04842	26.6822		2.04842	0	0.18115	2.02408	0.60613	2.10514	1.48995	3.54937	2.7633	3.32537	4.85692	4.36577	3.07352	5.02569	4.81342	6.29051	5.53712	8.58506	6.74734	7.95182	8.78504	9.10928	8.59316	9.27523	9.76701	10.7793
2.06768	23.4202		2.06768	0	2.51611	4.78349	9.28752		2.06848	22.2168		2.06848	0	-0.44152	0.32589	0.34521	0.49418	0.87357	1.39969	3.44323	1.56524	1.86721	1.41451	3.57303	2.49709	3.83835	5.30739	4.87623	5.12419	6.98779	4.99276	5.16188	6.79267	6.70492	5.41075	8.75135	7.90127
2.08774	18.419		2.08774	0	1.44331	4.72361	8.54708		2.08854	17.5567		2.08854	0	1.45904	2.01189	0.19361	0.60787	1.56344	1.51316	1.15597	2.28323	2.41944	1.82468	2.85843	2.63091	3.79479	3.58914	3.62467	4.22454	4.4824	3.82209	5.02176	6.15833	6.15033	6.22448	6.39168	6.09819
2.10781	15.8456		2.10781	0	1.40157	4.5909	5.70351		2.1086	15.3572		2.1086	0	1.69651	0.8709	1.00298	0.73851	0.76864	2.11811	2.36598	2.07005	2.57532	1.55833	1.63368	2.5563	3.34976	3.56156	1.65751	3.05812	3.43672	2.5057	3.38462	3.30431	4.73457	3.5665	4.21032	6.49617
2.12787	14.7121		2.12787	0	1.70655	2.50563	6.06964		2.12866	14.1711		2.12866	0	0.29547	1.19496	0.30719	-0.22972	0.92122	1.88208	0.79905	1.08034	2.41285	0.93901	2.71146	2.26207	2.84504	2.41259	3.14932	3.63614	2.96791	3.12405	4.24133	4.92798	4.67176	4.20326	4.38272	5.68096
2.14793	15.7444		2.14793	0	0.38408	1.92706	4.87508		2.14872	15.3356		2.14872	0	-0.93373	-0.2066	-1.73404	-0.59713	-0.909	0.69603	1.87147	0.69148	1.27062	0.51762	1.35192	0.90455	2.80769	2.69673	1.52663	1.64645	2.54406	2.89876	3.66932	2.1881	2.65255	2.97279	4.2754	2.62603
2.16799	18.361		2.16799	0	0.57096	2.58696	4.95938		2.16878	17.7085		2.16878	0	-0.39621	-0.94164	-1.90434	-0.01818	-0.19066	0.67188	1.77847	-0.00118	2.26751	0.37669	2.35981	0.24803	0.69483	1.96702	1.72774	1.33661	2.71858	2.33826	3.55511	3.18431	2.84339	4.2922	5.71102	4.82395
2.18805	23.3621		2.18805	0	2.77721	4.79874	7.79611		2.18884	23.2954		2.18884	0	-1.17527	-0.12768	-0.36968	1.03182	-0.68591	0.40727	1.6333	0.91764	2.24571	-0.23664	1.45415	1.76184	1.63276	1.9369	3.68855	3.30687	4.23142	4.83115	5.63932	4.97028	4.68405	4.70565	5.0758	5.6128
2.20811	37.667		2.20811	0	1.40309	4.94572	8.53126		2.2089	34.5539		2.2089	0	-0.48957	1.86776	-0.52903	2.14135	0.79872	0.65532	2.4197	0.34381	4.288	0.00147	4.52088	3.311	4.33386	3.65123	6.04206	4.47005	8.95825	6.52201	7.4233	6.9257	8.47766	9.66756	9.33514	11.1068
2.22817	59.4889		2.22817	0	2.50969	7.6714	13.3512		2.22896	55.8887		2.22896	0	-1.17056	-3.30343	-3.96385	-1.76145	-4.83687	-0.44599	1.26016	0.16288	3.8416	-3.80018	4.90152	0.61935	5.08725	4.4785	6.58653	4.87335	6.78724	6.71899	9.21323	9.39361	10.9169	13.4106	13.5761	12.3299
2.24823	86.4701		2.24823	0	2.13345	11.5997	22.6936		2.24902	80.3263		2.24902	0	-3.18593	1.95662	-3.57264	1.92031	-7.36191	-0.85781	2.93424	2.07083	4.24879	-6.77394	5.8636	-0.32757	8.24416	5.35962	11.4017	7.8197	12.8605	12.0674	20.264	15.9997	15.1152	21.2819	21.6049	21.0012
2.26829	112.609		2.26829	0	5.5914	15.9895	27.6967		2.26908	104.161		2.26908	0	-0.13543	-0.69298	-6.8336	3.25306	-9.62313	3.83709	0.82363	2.21242	10.2999	-5.97731	9.27095	5.80864	12.6541	7.88171	12.2822	13.1282	16.3776	20.8578	23.8105	24.2374	23.1391	27.6459	30.236	28.0099
2.28835	126.579		2.28835	0	12.3835	21.2576	32.7235		2.28914	122.344		2.28914	0	-3.44184	-3.83321	-8.76343	-0.01913	-11.6013	0.71595	2.64366	-3.6704	9.31257	-8.54335	7.21186	0.30433	11.8773	8.22824	18.1602	14.2287	17.9501	20.2539	24.2173	24.8034	23.646	27.6836	31.2448	25.9815
2.30842	133.224		2.30842	0	3.96762	18.1683	27.2891		2.3092	117.147		2.3092	0	2.01346	6.14812	-2.17624	6.44878	-9.3946	4.83587	6.95901	6.84775	13.3354	0.3752	10.5019	4.08549	14.7333	15.4794	21.4157	22.1185	19.8348	22.5252	27.9236	31.6194	28.9737	34.88	34.2639	35.7543
2.32848	115.11		2.32848	0	4.10687	14.0013	26.1566		2.32926	104.398		2.32926	0	2.36617	1.05279	-5.21019	1.80918	-4.34893	1.85485	2.19985	4.21565	9.21899	-3.55867	9.98758	4.04772	10.1412	8.83401	18.1751	14.5195	19.1041	22.7173	25.0657	26.6695	25.0925	29.4308	29.8028	29.0429
2.34854	88.6663		2.34854	0	4.86226	14.3485	21.3096		2.34932	83.6253		2.34932	0	-2.17262	-0.91144	-5.05345	-0.96921	-4.98474	-0.40751	0.45252	1.72306	6.90591	-2.7003	6.68234	2.50952	7.04765	7.61734	9.93519	11.6434	10.9119	12.5247	12.1671	14.9318	18.2361	18.8831	19.1617	18.6687
2.3686	65.7978		2.3686	0	1.75193	9.10137	10.4659		2.36938	60.3738		2.36938	0	-0.37317	0.1422	-3.31643	-0.23486	-3.77013	1.42553	2.51797	2.72198	6.53107	-0.23092	4.75082	1.49734	5.97816	6.28522	9.95449	7.01126	9.35794	10.008	10.9344	10.5086	11.7768	14.75	14.5488	13.2747
2.38866	47.4224		2.38866	0	2.95258	4.64094	6.73144		2.38944	43.0104		2.38944	0	1.33775	2.63528	1.36556	1.31268	-0.15536	2.6711	3.57761	1.92568	4.52664	0.72668	4.0614	3.11369	3.46439	5.78928	7.99083	5.87303	6.6641	7.97982	9.81699	9.23274	9.13624	9.78245	8.42784	11.2017
2.40872	36.7513		2.40872	0	0.54678	3.53565	6.87884		2.4095	34.2732		2.4095	0	0.89084	2.53648	-1.98065	1.3881	-0.12183	3.11228	3.62528	2.32619	3.69952	1.93983	2.59104	1.25338	4.83107	4.64546	6.25727	5.20708	5.75414	4.96878	7.28813	5.56549	6.19522	7.02472	8.49412	7.64976
2.42878	34.6584		2.42878	0	-0.42744	2.13289	4.44039		2.42956	31.9666		2.42956	0	0.86866	0.44657	0.36885	1.34585	-1.0838	-0.37759	2.51198	0.49678	1.65902	-0.51436	2.25366	0.96401	2.39059	2.60618	3.00132	5.10319	5.31743	3.06062	5.91339	6.18754	3.08992	5.19955	4.57018	4.1313
2.44884	32.55		2.44884	0	0.41854	1.95953	4.79228		2.44962	30.6722		2.44962	0	-1.0276	-0.45725	-1.75847	-0.57019	-3.32758	0.93843	0.94577	1.38187	2.38852	-0.00679	1.1858	1.72242	1.4741	0.78707	1.61256	1.35951	2.47355	4.04943	2.51563	4.09105	5.15088	4.71387	4.34485	4.7021
2.4689	31.2272		2.4689	0	1.75567	2.25768	5.45089		2.46968	30.4567		2.46968	0	-1.00612	-0.84518	1.13015	1.71375	1.51088	0.59379	0.98917	0.56338	2.64647	-0.15213	1.29295	1.52998	2.07992	1.97554	3.63856	2.66062	2.31897	2.73621	4.24235	3.67216	4.44683	5.5224	5.72807	3.90281
2.48896	31.7067		2.48896	0	1.04332	2.87488	4.49893		2.48974	31.6647		2.48974	0	-0.61867	-0.56611	-0.16312	-1.02422	0.02882	-0.11854	0.12529	-1.82927	2.00509	-1.48727	-0.13181	0.42923	0.65519	1.76211	2.60491	1.86513	1.48083	3.34062	2.26853	1.37018	2.25273	2.86384	3.48539	3.77027
2.50903	32.637		2.50903	0	1.18881	4.008	4.44013		2.5098	32.7856		2.5098	0	-0.403	-0.6742	0.5551	-0.09819	0.70684	0.2042	-0.15678	0.73331	0.99355	-0.27114	1.36957	0.70279	1.07308	1.76552	1.24415	1.5044	2.01519	2.2415	3.0546	3.81526	2.46818	4.64421	4.47845	2.69456
2.52909	38.9177		2.52909	0	0.89287	2.14479	5.50912		2.52986	37.6394		2.52986	0	-0.66476	-1.36856	0.53437	-0.08206	0.4579	1.8795	1.57114	2.27741	1.33296	-0.83178	1.99882	1.96305	4.60833	2.18735	4.06889	2.92659	2.8236	4.26635	4.42749	4.23372	3.90301	4.34006	4.95057	4.35131
2.54915	51.8711		2.54915	0	0.81412	2.8837	5.5743		2.54992	51.1197		2.54992	0	-0.28217	1.14219	0.12068	-0.37532	-2.2997	1.88811	0.82406	2.02382	0.80925	-1.3068	1.30511	0.45381	3.31009	2.0475	3.1101	2.01976	2.758	2.03233	2.58516	2.93925	4.70736	4.94819	1.92473	3.05028
2.56921	77.7913		2.56921	0	2.83451	5.85426	9.35066		2.56998	76.4661		2.56998	0	0.04894	0.66598	0.33079	-0.92071	-0.41903	0.97687	1.24517	2.13981	2.34834	1.99396	1.98686	1.85962	3.607	2.30091	4.68207	4.83902	2.41293	6.27551	6.17292	5.11467	5.01867	8.06453	5.41258	5.38249
2.58927	121.274		2.58927	0	5.76142	13.0756	14.2945		2.59004	123.961		2.59004	0	0.91308	-3.76904	-3.57976	-2.51889	-0.19667	-1.63303	-1.01643	0.83061	4.45692	0.25328	4.90165	1.41176	2.45697	4.66558	3.89109	3.53497	6.05223	4.02853	4.40737	3.84697	7.78759	5.84605	6.38242	6.40881
2.60933	196.128		2.60933	0	3.94572	10.3549	20.3394		2.6101	195.162		2.6101	0	2.47645	1.9252	-3.00908	-3.71269	-3.94154	-0.39048	-0.85104	1.6226	4.41968	-0.0496	7.73255	2.63668	3.37344	3.06421	7.35976	6.56029	4.41174	7.57673	9.83872	11.2734	9.30715	11.7251	13.7378	10.6755
2.62939	287.092		2.62939	0	7.57444	22.1717	31.0257		2.63016	285.453		2.63016	0	1.29103	4.71333	-2.73214	4.10071	-2.71431	6.02427	8.42128	2.32277	9.20255	-4.50574	8.94019	7.44778	10.8646	11.4743	16.2343	11.0374	11.898	12.7582	15.5828	18.5544	21.3349	22.7112	21.9844	24.4594
2.64945	377.749		2.64945	0	15.9351	30.8293	46.3743		2.65022	382.368		2.65022	0	-1.29996	3.31405	4.60937	2.29822	4.74756	7.73465	13.2001	7.75272	17.4732	2.79573	14.5778	2.35159	15.527	15.8995	19.8607	19.6204	20.5397	20.0064	18.2316	24.9446	26.5904	28.9647	33.0087	25.563
2.66951	459.434		2.66951	0	19.8595	36.6953	51.565		2.67028	448.564		2.67028	0	8.00625	4.83224	5.37307	12.7675	1.26949	14.3483	17.6819	23.9965	29.0486	9.45572	17.7323	13.8805	26.1736	19.3245	31.7361	25.8042	30.6753	34.4564	36.2321	43.1075	40.3437	43.6278	44.4228	46.7625
2.68957	484.325		2.68957	0	18.7989	38.4132	47.4261		2.69034	479.974		2.69034	0	5.29061	2.62443	4.69407	8.09727	-1.61667	13.9678	6.03889	5.96458	21.5071	7.57759	16.3817	15.4647	19.0836	21.2335	34.8357	28.0543	26.8569	35.1689	32.7455	37.4916	38.5809	44.2202	40.1039	39.1978
2.70964	459.696		2.70964	0	9.93309	24.3952	43.111		2.7104	449.51		2.7104	0	-2.96551	3.08879	-2.99448	7.14511	3.9397	14.523	11.8105	7.34667	16.3202	1.11279	17.0032	10.5549	24.0799	14.3138	30.8988	25.9231	25.1143	24.1641	33.6618	32.974	34.6885	33.8244	42.3105	30.6828
2.7297	398.871		2.7297	0	2.3076	21.0256	30.7877		2.73046	384.416		2.73046	0	-0.99784	3.68034	0.85126	10.5491	4.6253	7.64785	4.93662	11.7586	17.4637	6.16563	19.6388	10.6234	19.1797	15.9061	24.8808	28.1271	24.7013	21.6066	22.2986	26.3762	32.7151	26.7198	41.1759	37.7931
2.74976	323.319		2.74976	0	11.5634	24.2989	31.0492		2.75052	315.848		2.75052	0	-0.68784	5.15874	-1.26139	5.85544	-0.7119	7.86589	3.10586	1.82779	14.6343	-1.36321	14.8897	10.4766	11.4244	10.8959	22.3347	15.3235	18.7474	20.6437	24.4225	26.052	28.9123	30.0761	28.305	30.6073
2.76982	282.541		2.76982	0	11.0771	14.4656	23.0169		2.77058	279.693		2.77058	0	-2.24073	-1.57337	-5.26878	3.5902	-6.76248	4.45894	3.68549	6.2091	4.64394	-4.25104	5.46844	1.90199	8.49701	9.88363	17.4353	7.61168	8.75402	7.6435	12.5498	16.7232	16.9739	19.0879	16.7624	17.8488
2.78988	274.356		2.78988	0	4.58652	9.70318	14.5978		2.79064	267.614		2.79064	0	1.30011	3.78115	-3.32798	6.05989	-4.04271	4.62162	-0.88369	3.83305	8.80455	-2.54265	7.03603	5.18487	8.89116	10.373	14.135	4.14233	11.1614	13.9782	10.1175	13.9697	13.3653	18.9889	17.1307	18.9361
2.80994	279.75		2.80994	0	4.28011	12.677	17.4251		2.8107	271.044		2.8107	0	4.40372	-1.04911	-2.07388	4.99956	3.59313	11.5131	4.84931	6.69391	11.8983	2.05978	13.5756	2.39808	10.1444	7.9597	11.557	9.26947	8.97483	15.0471	13.4866	18.8095	16.8593	18.439	20.3277	19.2596
2.83	290.203		2.83	0	-0.27571	3.64118	7.41386		2.83076	282.202		2.83076	0	-3.34896	-6.51796	-3.00927	1.57736	-3.38887	-1.13175	3.00446	-0.11272	3.19473	-4.38204	-0.00988	-2.04516	6.70232	4.60676	8.51299	4.47333	4.11146	7.99395	10.8095	11.1522	9.09716	9.43467	9.47908	12.869
2.85006	285.116		2.85006	0	1.67545	4.41534	6.81787		2.85082	286.835		2.85082	0	-3.45387	-3.45648	-7.59863	-0.89992	-12.963	-5.915	-2.38066	-7.33031	3.6894	-11.9023	-4.66405	-5.71127	-2.87147	-4.22028	-0.30801	-5.04483	-3.20095	-2.20646	-1.69384	3.19345	5.0777	0.12114	2.00636	3.26641
2.87012	281.654		2.87012	0	2.20073	-0.15547	-1.70445		2.87088	287.181		2.87088	0	-3.58399	-7.35896	-4.86638	-5.59848	-12.6609	-9.81722	-10.3843	-13.4502	-2.62994	-18.1741	-8.88986	-9.46874	-5.51605	-7.9397	-8.96506	-8.47591	-11.1055	-8.49324	-7.01713	-9.01016	-11.898	-10.204	-8.17833	-4.88583
2.89018	285.376		2.89018	0	-4.7475	-11.1934	-22.3107		2.89094	293.779		2.89094	0	-5.82628	-4.86189	-7.22918	-8.16732	-13.9693	-12.3633	-16.1859	-13.7576	-13.5539	-19.1201	-18.0879	-18.1697	-15.1487	-18.6669	-14.6031	-23.4119	-16.8079	-21.5323	-22.0285	-22.127	-22.6153	-19.8353	-24.6777	-20.0552
2.91025	294.274		2.91025	0	-12.4389	-18.1008	-31.0618		2.911	304.543		2.911	0	-0.76706	-1.79071	-5.09792	-7.40461	-11.0681	-13.3455	-20.8424	-12.6094	-13.5192	-21.4504	-20.7908	-20.2461	-19.1069	-17.1291	-20.1981	-30.963	-29.031	-27.9302	-25.6936	-23.726	-24.9885	-28.534	-33.1094	-32.1476
2.93031	299.521		2.93031	0	-8.18286	-20.9484	-40.7522		2.93106	317.467		2.93106	0	-2.82397	-8.76555	-3.41457	-7.93782	-15.271	-18.3608	-12.8374	-15.796	-21.6592	-24.1285	-24.0916	-19.2881	-26.7405	-27.3279	-24.7003	-35.8505	-35.7701	-29.1704	-36.2056	-36.2111	-36.3765	-40.9735	-37.3633	-37.9404
2.95037	292.936		2.95037	0	-10.7376	-27.411	-41.871		2.95112	317.636		2.95112	0	-9.78479	-16.0689	-15.1334	-17.3939	-19.3124	-24.1109	-24.0195	-26.7582	-23.6979	-26.4241	-34.8155	-31.0642	-30.8338	-38.5677	-30.5426	-39.7348	-39.0104	-43.6208	-42.93	-40.6033	-39.3958	-43.9562	-46.9532	-52.4696
2.97043	265.444		2.97043	0	-5.75187	-24.5999	-36.4742		2.97118	290.452		2.97118	0	-9.61509	-15.7806	-17.6104	-20.1391	-22.5037	-24.7669	-26.195	-27.1258	-28.2253	-34.1806	-30.7987	-31.7263	-31.3742	-31.7294	-36.4497	-45.1465	-41.793	-34.5838	-43.827	-46.8041	-41.0018	-42.7943	-47.6542	-49.7265
2.99049	218.838		2.99049	0	-9.56647	-22.0702	-33.5871		2.99124	230.212		2.99124	0	-4.80493	-10.9279	-12.5895	-11.1825	-13.7076	-14.1304	-14.7372	-14.2781	-15.7002	-23.245	-18.6929	-19.5625	-23.9164	-22.603	-23.3503	-27.4259	-25.0022	-25.7055	-28.2159	-26.1402	-23.2458	-32.9748	-29.8984	-32.3329
3.01055	159.842		3.01055	0	-5.19988	-11.1983	-18.5756		3.0113	166.408		3.0113	0	-0.33362	-3.372	-6.93325	-2.1299	-6.82527	-4.90625	-6.1455	-5.2537	-8.25327	-12.1638	-8.59147	-12.461	-8.88404	-9.56547	-11.3321	-14.6764	-15.0518	-13.852	-16.4488	-12.9157	-18.2285	-17.7432	-17.8374	-19.0475
3.03061	113.205		3.03061	0	-4.56467	-10.8488	-13.621		3.03136	118.848		3.03136	0	-3.82671	-5.09984	-6.14468	-6.77875	-9.25831	-8.88895	-10.0992	-6.3996	-7.01518	-10.8684	-6.13113	-9.69385	-8.42781	-11.5835	-11.2388	-14.2192	-12.9855	-9.3338	-11.199	-13.7924	-13.3049	-14.7555	-14.6516	-15.0815
3.05067	76.5701		3.05067	0	-1.12961	-3.54396	-4.23238		3.05142	77.3258		3.05142	0	-2.53515	0.60382	-0.08024	-1.3068	-4.01322	0.87139	-3.01289	-2.89892	-0.18293	-3.88126	-2.70886	-3.01212	-1.7613	-3.48845	-0.7369	-4.48994	-2.56281	-5.39307	-2.51126	-3.38028	-3.83833	-2.31214	-3.1718	-5.19675
3.07073	56.6105		3.07073	0	-1.16473	-1.82613	-1.99886		3.07148	57.8501		3.07148	0	0.25335	-1.29952	-2.18268	-2.1503	-2.21547	-1.50248	-4.03512	-1.77684	-2.66311	-4.99651	-2.08785	-2.62948	-2.35823	-1.87211	-3.07477	-0.58443	-2.97009	-4.17378	-2.10649	-2.21594	-2.37295	-2.06764	-1.78995	-4.20967
3.09079	48.4831		3.09079	0	-0.44783	-2.06746	-0.15918		3.09154	48.2295		3.09154	0	0.79723	-0.34257	0.05982	-2.22554	-1.21671	-1.9016	-1.62001	-0.60068	1.22034	-2.94158	0.05587	-1.16153	0.45625	-0.07849	-0.02043	-1.01804	-1.99513	0.62052	-1.64955	-0.20866	0.03951	0.32145	-0.88535	-1.40117
3.11086	47.4077		3.11086	0	-1.59526	-0.43501	-1.32774		3.1116	49.9777		3.1116	0	-3.30079	-3.06046	-4.85325	-2.78868	-3.16208	-3.99455	-3.00248	-2.82281	-3.7026	-4.45717	-4.11957	-3.87515	-2.26755	-3.55639	-2.53208	-3.13616	-3.72136	-2.8528	-3.43889	-2.46023	-1.92806	-2.30585	-2.34669	-3.34916
3.13092	52.859		3.13092	0	-1.27858	-3.57415	-2.89691		3.13166	51.9837		3.13166	0	1.09645	-1.10099	0.32618	0.91512	-1.87079	-1.25995	-0.59911	-0.13266	1.81423	-1.46873	-0.27405	-2.21218	-0.09039	-0.50292	-1.35348	-0.92874	-0.32612	-1.0807	-1.78531	-1.57826	-1.56809	-2.00391	-1.02935	-1.13347
3.15098	60.4771		3.15098	0	-1.35596	-4.20079	-4.36018		3.15172	59.6835		3.15172	0	-0.56633	-0.35267	-1.10716	-1.95744	-3.74371	-2.02136	-3.28741	-1.73624	-0.29925	-3.60092	-2.85921	-1.97425	-1.65525	-3.07842	-0.91661	-0.7884	-0.97029	0.8062	-0.05795	-3.02106	-1.5988	-0.91191	-1.68693	-3.71268
3.17104	72.8487		3.17104	0	-1.66643	-2.71826	-1.07146		3.17178	72.9045		3.17178	0	-0.93835	-1.63439	-1.2831	0.05537	-3.33359	-4.10227	0.72003	-0.80425	0.15112	-6.34344	-1.73342	-4.19008	-1.19858	-2.02931	-1.85633	-1.65376	-1.1911	-0.49166	-1.7074	0.2534	-1.69606	-1.71506	-0.95241	-4.0709
3.1911	96.9377		3.1911	0	-2.49432	-1.88114	0.29985		3.19184	97.2351		3.19184	0	-1.78982	-1.71968	-5.44728	-2.16791	-7.12937	-3.48016	-4.57519	-5.57511	-1.83471	-9.14803	-4.86866	-5.17904	-3.93935	-2.85734	-2.08229	-2.20537	-1.95779	0.44365	-1.04759	-1.65287	-0.21607	1.66924	-2.81115	-4.17723
3.21116	140.959		3.21116	0	-0.3978	2.13837	1.11979		3.2119	138.933		3.2119	0	-3.19266	-4.99128	-4.69364	-2.40813	-11.8433	-6.39169	-5.98684	-5.07234	1.13325	-11.3589	-2.74523	-5.98732	-1.84987	-0.90109	2.11671	-2.51094	-1.5796	-0.92008	2.84929	1.76091	2.49907	3.86378	1.33842	1.94336
3.23122	209.082		3.23122	0	-2.58303	1.46835	7.63692		3.23196	202.885		3.23196	0	-0.33256	-2.82446	-8.74436	-1.35217	-17.6401	-3.33023	-1.4983	-6.18766	6.30144	-16.4475	0.09564	-5.92349	4.06101	-3.77301	6.68145	-1.92392	1.95657	5.66145	9.28451	7.64097	8.65908	11.4966	12.6602	9.52189
3.25128	297.311		3.25128	0	1.92933	10.2961	13.2211		3.25202	291.667		3.25202	0	-5.80722	-7.34089	-20.5151	-7.86595	-27.4569	-6.39491	-5.72936	-9.81531	2.83806	-29.9939	0.73253	-18.3315	-1.91674	-3.71238	6.15967	0.30572	8.47576	12.3091	13.7076	11.0718	15.8466	20.915	20.1735	14.8816
3.27134	393.724		3.27134	0	-2.4657	6.59095	21.5431		3.27208	374.99		3.27208	0	-3.92601	-4.24345	-18.6803	-5.0195	-38.0712	-13.2446	-9.40564	-6.21717	8.85044	-35.4513	6.91515	-16.8078	6.56056	-2.01993	16.0472	2.84909	14.638	12.9063	25.9378	19.6991	24.4799	27.2653	35.4182	23.1942
3.2914	450.684		3.2914	0	1.75896	18.236	30.7972		3.29214	431.613		3.29214	0	0.50881	1.82718	-21.4529	-2.68886	-39.7618	-3.73684	-8.68523	0.45001	20.5672	-29.1092	9.93438	-20.8911	15.3154	0.57902	22.5117	11.7253	13.9172	24.7662	36.1056	33.1065	31.6605	44.2059	45.8755	36.4165
3.31147	469.165		3.31147	0	-2.03014	7.34517	27.5174		3.3122	435.84		3.3122	0	-2.98693	2.90112	-14.0895	3.77163	-29.2208	1.99021	-3.12644	2.36141	23.8624	-30.9302	13.617	-9.80151	13.7751	14.1675	26.7701	21.8062	23.5397	32.8116	45.5327	38.6587	37.994	49.3411	52.0208	47.7047
3.33153	421.854		3.33153	0	-3.54078	9.35439	21.5006		3.33226	392.699		3.33226	0	-0.54932	-0.78847	-14.2749	2.24416	-30.0138	0.85116	-4.09971	-1.13444	22.3766	-29.378	9.36155	-7.05576	12.3927	4.61741	25.8895	13.8947	21.5384	27.7579	34.5985	30.1475	33.5661	41.8876	38.2866	42.4185
3.35159	333.278		3.35159	0	-4.93611	7.83203	13.5926		3.35232	309.612		3.35232	0	-2.81766	-2.29028	-15.043	-0.06146	-24.672	-4.23534	-1.60574	-2.79278	9.62803	-20.7821	5.0452	-4.76205	19.1347	1.02396	17.5984	15.3486	18.2081	17.7088	23.6409	27.737	28.1381	31.2134	36.7415	25.6746
3.37165	231.353		3.37165	0	0.77822	6.28772	10.5169		3.37238	216.044		3.37238	0	1.5575	1.08511	-13.4135	2.21036	-16.2079	-2.39676	0.03337	-2.32884	9.62391	-16.5136	9.1072	-4.98713	3.1715	2.15985	13.0033	9.24006	13.5801	14.6894	17.4981	20.691	18.6164	27.4817	19.5975	25.6935
3.39171	148.59		3.39171	0	-4.9193	-0.68139	5.39864		3.39244	135.655		3.39244	0	-1.16444	4.38585	-7.36062	2.6376	-9.46901	-1.60527	-3.89166	-0.60922	7.2178	-10.356	2.59175	-4.38218	4.83132	-0.88783	6.85659	6.69545	8.03476	8.38452	8.64706	11.4928	15.3305	16.0868	14.1476	17.9306
3.41177	86.3112		3.41177	0	0.35997	3.9469	3.78281		3.4125	80.9306		3.4125	0	0.54329	-1.38465	-3.32121	-1.26978	-6.53806	1.5762	-2.25149	0.00171	4.66733	-3.99878	5.02085	0.33412	1.24542	0.7337	7.26366	3.95749	5.0048	5.34854	10.8496	8.9416	8.22302	11.1822	8.98086	8.19792
3.43183	55.1132		3.43183	0	-1.57075	-0.15353	2.87832		3.43256	52.0489		3.43256	0	-0.737	-2.30841	-3.56737	-0.22773	-4.67891	-2.25182	-1.73982	-1.14566	2.72652	-3.14829	0.89598	-4.05818	3.03123	-1.38977	6.5652	1.00394	1.82905	3.30889	3.27797	2.27281	4.45693	5.60109	6.49916	4.09622
3.45189	41.1707		3.45189	0	1.38631	0.62344	3.65469		3.45262	37.5944		3.45262	0	2.95951	1.90913	-0.53259	1.79471	-0.19066	2.87247	3.53036	1.15905	3.9444	-2.12577	3.08404	0.24904	2.57206	2.31881	4.00486	3.42742	5.1988	3.85281	4.75619	4.27894	5.26208	6.20924	5.89805	5.34118
3.47195	40.8653		3.47195	0	-1.16844	0.15375	4.37354		3.47268	41.0476		3.47268	0	-2.3481	-2.57851	-2.168	-1.61606	-2.88359	-1.05469	-0.86919	-1.62625	-0.2931	-4.04868	-0.80252	-2.2171	-0.46926	-0.91815	0.98807	-0.00425	-0.56312	0.02855	-0.18723	0.91341	0.31954	-0.8044	0.6173	1.95551
3.49201	50.5478		3.49201	0	0.43846	1.4414	1.6281		3.49274	48.596		3.49274	0	-0.06509	-0.17027	-2.40265	-1.14827	-4.53417	-1.51407	-0.82506	-0.34252	-0.77788	-3.62742	1.07638	-1.46339	-1.03767	-0.29364	3.43041	-0.25589	3.08215	1.95729	1.90867	2.6405	4.05433	3.73523	3.01849	2.10127
3.51208	68.6908		3.51208	0	-0.58922	1.2919	5.34431		3.5128	67.6653		3.5128	0	-1.26129	0.60912	-4.64107	-2.57031	-7.64087	-2.37531	-2.29997	-1.59673	-0.80299	-6.14082	-0.15671	-1.71846	0.03049	-2.62788	0.91783	-1.93058	-0.41585	0.68568	1.01255	1.40167	3.32503	3.10625	3.05352	5.01431
3.53214	101.052		3.53214	0	-0.52167	1.45135	4.45069		3.53286	95.3829		3.53286	0	1.03239	1.9859	-0.36524	2.011	-7.88008	-0.22744	0.65381	-0.36221	2.91174	-7.33655	2.81338	-2.70475	3.4839	2.95166	7.51399	5.64078	6.6683	6.85957	6.57081	5.64686	4.55104	8.73036	5.57948	7.3479
3.5522	153.082		3.5522	0	-1.5802	4.2467	8.78867		3.55292	148.614		3.55292	0	0.47181	-1.31101	-6.12055	2.13165	-14.2655	-2.90732	-2.56934	-3.87519	3.80115	-10.5004	0.79323	-7.45231	0.13079	-3.64207	8.49022	-0.14034	4.02512	5.3171	8.42616	9.16532	5.72245	10.0948	10.4984	8.66012
3.57226	243.143		3.57226	0	-9.64858	0.36528	9.84076		3.57298	233.018		3.57298	0	-1.68333	1.52451	-10.4771	-5.60632	-23.7802	-7.11059	-3.75597	-5.34346	3.29883	-20.0361	1.4087	-8.76865	0.37298	-3.24686	4.01276	3.53675	0.65897	8.21876	4.44723	5.64151	12.7724	12.8588	15.369	13.9728
3.59232	379.304		3.59232	0	-10.2036	-1.24207	13.3225		3.59304	359.634		3.59304	0	1.27494	1.43655	-15.086	-2.6347	-34.1908	-7.62818	-5.79273	-3.95861	9.14469	-33.4205	5.64894	-13.402	0.43452	-0.43641	12.7526	1.46163	17.7093	11.3825	17.0254	18.4291	16.1297	19.4346	22.0934	20.7417
3.61238	564.602		3.61238	0	-2.35766	4.97581	20.3733		3.6131	545.548		3.6131	0	-10.5434	-9.52335	-33.184	-9.92167	-51.0862	-11.4189	-27.1424	-24.4525	9.07772	-52.3588	-2.83508	-31.5932	-8.90182	-14.5023	12.7388	1.76366	3.75034	12.5494	20.225	20.9459	13.9788	25.3292	24.1441	25.9096
3.63244	783.541		3.63244	0	-10.0128	0.87962	25.6537		3.63316	743.285		3.63316	0	-3.01037	-5.56208	-33.0378	0.31679	-67.0863	-11.0026	-17.4921	-8.94856	18.2276	-65.4846	3.4702	-28.2284	9.95333	-3.41949	21.9071	6.70325	21.8755	36.5477	44.8488	43.798	36.8368	60.5673	47.6997	46.2834
3.6525	984.914		3.6525	0	-16.9366	9.15903	32.451		3.65322	937.532		3.65322	0	-8.6955	-14.6401	-46.5092	-8.51398	-93.0552	-19.4846	-25.9887	-15.6743	23.8258	-84.1946	7.78319	-41.6891	-3.98603	-6.53222	25.9053	14.919	23.6783	30.9562	54.5248	43.9531	52.4233	57.4062	58.8287	54.6095
3.67256	1102.16		3.67256	0	-17.3522	10.812	44.219		3.67328	1054.76		3.67328	0	-14.7615	-24.8236	-56.7658	-20.0311	-107.571	-29.9654	-39.136	-28.8568	26.298	-101.195	6.54372	-53.9457	-2.7737	-14.4427	29.5276	5.61824	18.1642	30.2494	56.3469	34.5149	48.9766	64.7762	67.938	58.4081
3.69262	1080.88		3.69262	0	3.9835	32.6577	56.108		3.69334	1022.82		3.69334	0	4.08744	0.32486	-40.719	1.3073	-84.4559	-3.93276	-9.35046	-10.8356	43.1307	-79.1645	18.694	-33.873	30.1799	3.93765	56.1845	30.52	44.7679	59.1091	79.4927	63.5418	70.1562	86.8866	87.8615	95.9602
3.71269	954.154		3.71269	0	-7.26281	19.8329	42.93		3.7134	895.208		3.7134	0	-10.5686	-3.69603	-42.1474	-0.21402	-72.7124	-8.92279	-11.1969	-15.6159	29.1862	-70.5177	14.6292	-31.8243	19.0009	2.68847	40.5904	20.4989	36.5756	53.5152	61.5555	57.529	59.6241	67.3756	86.0079	72.7547
3.73275	733.24		3.73275	0	0.4556	2.68147	27.5561		3.73346	690.469		3.73346	0	-8.01819	-4.90054	-38.0275	-6.46639	-65.1921	-5.09629	-20.663	-5.13951	25.8779	-58.9141	17.7099	-23.3382	16.5338	-8.65721	29.9826	13.353	19.6821	33.9634	45.5602	46.7546	43.8122	52.5455	57.5957	53.0141
3.75281	500.302		3.75281	0	-3.28358	2.68802	14.8751		3.75352	463.618		3.75352	0	1.44774	-1.66597	-22.7914	-3.55795	-25.6084	1.34168	0.0472	-2.94789	17.7557	-32.3592	9.11537	-12.3928	9.34234	5.33035	27.1967	12.7476	29.2107	22.9845	39.589	29.761	37.4265	38.0928	46.253	47.2611
3.77287	301.731		3.77287	0	4.09303	8.10457	9.90767		3.77358	282.907		3.77358	0	-1.18607	-0.21801	-10.1728	1.13215	-17.6712	-1.92254	1.09564	-4.6303	17.4851	-19.8972	8.92979	-9.01334	2.76891	3.53481	16.3602	11.2611	13.3364	25.0006	23.2813	21.8014	20.0698	32.8625	29.5731	23.4223
3.79293	172.505		3.79293	0	-0.44333	3.91559	5.24697		3.79364	161.127		3.79364	0	-0.48595	-3.47902	-12.2169	1.01731	-11.4162	1.08522	0.5764	1.62075	6.56616	-10.3257	7.0702	0.60881	9.59767	2.591	7.38615	5.97961	8.47751	6.88973	10.6409	10.3481	15.5148	11.3844	15.7714	15.3665
3.81299	97.8679		3.81299	0	2.25694	4.70724	6.61701		3.8137	93.4187		3.8137	0	-1.68234	-0.81275	-5.84345	-1.21716	-6.50945	2.7278	0.46713	-3.00811	3.54809	-6.60647	1.09323	-3.16542	3.95221	1.30497	4.85304	2.95763	5.34231	7.2297	7.3928	7.67663	9.64674	8.67248	7.87335	7.68992
3.83305	65.5071		3.83305	0	-0.79105	-0.60006	2.65412		3.83376	60.8481		3.83376	0	-1.12772	0.53004	-0.90325	1.48864	-2.1463	1.92091	-0.36529	1.88151	2.38105	-4.08301	2.91127	-2.75292	1.53692	1.96235	3.52507	3.54085	4.59258	4.18373	4.62932	5.2875	5.40918	5.81342	5.37919	7.04209
3.85311	54.0074		3.85311	0	-1.13335	-0.17412	2.19833		3.85382	50.8397		3.85382	0	1.67983	-0.04322	-0.60402	0.01208	-0.96726	0.29337	2.97539	1.6359	1.95681	-2.30142	0.24146	-0.23169	0.0136	0.55459	2.01554	2.49512	3.64796	1.00218	3.98341	2.95689	3.12554	3.44818	4.80316	5.06739
3.87317	54.9674		3.87317	0	0.02816	0.41655	2.31565		3.87388	55.2398		3.87388	0	-0.80151	-2.35279	-3.29309	-2.36233	-4.35473	-2.66302	-0.62891	-0.71784	-0.65759	-4.68202	0.4358	-3.55916	-1.13501	-0.62394	2.21824	0.52755	0.68604	-0.66838	1.14028	1.51003	-0.2454	-0.31485	0.4673	2.14045
3.89323	64.3292		3.89323	0	2.65326	2.96242	3.6986		3.89394	64.4933		3.89394	0	1.6519	1.53989	-0.20732	-1.76882	-4.10315	-1.29332	-1.42954	0.08901	3.03864	-5.39285	0.28458	-1.95725	2.1834	-1.66129	2.27939	1.39386	0.49121	3.70476	2.6942	3.12961	3.12236	3.68481	5.41263	3.35155
3.9133	86.4848		3.9133	0	-1.47191	-1.37539	3.06318		3.914	82.7193		3.914	0	1.4712	-0.28541	-0.726	0.10915	-6.20031	-2.38886	1.18658	-1.46397	4.35691	-3.25848	0.06813	-1.90497	-1.41047	-1.96304	1.85347	-1.45717	2.73674	1.26719	1.19164	2.49318	3.67289	3.70119	4.31	6.93047
3.93336	112.464		3.93336	0	0.27381	0.98086	4.1093		3.93406	112.874		3.93406	0	-4.83835	-3.24246	-5.60165	-3.64996	-11.4657	-5.58728	-4.96433	-3.65745	0.46046	-12.2255	-5.83551	-7.73162	-0.32918	-5.19897	-2.27706	-2.88171	-2.00257	0.98574	0.98189	0.12289	0.6874	5.5253	3.14167	1.48584
3.95342	145.45		3.95342	0	1.72393	3.79222	4.96727		3.95412	139.448		3.95412	0	-0.75459	-3.22237	-4.41783	-0.57522	-12.271	-4.21381	-0.24329	-3.47669	4.59803	-9.91939	2.72063	-6.6091	2.42464	2.41023	5.68043	4.94343	2.93457	4.76548	7.74775	2.60178	8.73181	9.17223	9.43119	9.25049
3.97348	178.204		3.97348	0	-1.27268	1.77105	2.67773		3.97418	170.488		3.97418	0	-1.37316	-1.69799	-7.99826	-4.29218	-15.4663	-3.36256	-2.76232	-1.0407	0.83961	-11.2485	-0.40533	-5.10528	-0.8908	-3.44036	5.39864	4.34989	2.75313	4.56039	6.58495	2.91264	7.51224	13.2329	10.3682	4.9445
3.99354	199.268		3.99354	0	-3.95846	-0.99309	2.7207		3.99424	188.605		3.99424	0	-2.56652	-4.70816	-11.3595	-4.41794	-17.5437	1.03712	-3.32875	-3.23898	3.49912	-15.5313	0.5052	-8.14134	1.36844	-3.37423	5.27733	1.34551	3.32313	6.68544	6.55341	7.63469	8.60987	12.6102	8.23303	9.44896
4.0136	197.712		4.0136	0	-2.01127	3.24142	7.28676		4.0143	188.133		4.0143	0	-3.55967	0.07435	-9.49676	-3.14802	-13.9732	-4.48062	-3.43686	-2.5941	6.27736	-15.4633	0.15407	-12.6458	0.36597	0.79549	6.03359	6.31347	7.16966	8.25029	10.1367	11.6954	5.337	12.2037	15.661	14.6284
4.03366	180.166		4.03366	0	-0.69243	4.69438	6.6202		4.03436	169.709		4.03436	0	0.37545	5.41643	-5.72266	4.50153	-14.3413	2.7599	-2.56443	-2.50207	6.61574	-10.6828	1.15344	-4.6698	1.16645	5.64088	8.55454	4.41161	9.28204	7.71998	8.76877	11.1286	10.5041	15.4615	12.9995	12.7136
4.05372	150.072		4.05372	0	-1.11274	0.32497	4.69887		4.05442	142.208		4.05442	0	-0.30246	-1.67226	-4.78243	-3.42128	-14.1882	-2.38409	0.45958	0.18257	3.16476	-11.744	-0.29954	-4.84371	4.52054	0.14748	5.18902	3.81186	9.16935	7.35515	8.49544	8.89898	9.34583	11.0716	13.8667	12.4496
4.07378	115.576		4.07378	0	0.12412	0.70844	5.8829		4.07448	112.852		4.07448	0	-0.84994	-2.46643	-5.90143	-0.65473	-12.3095	-4.85439	-3.71665	-2.68774	-3.15039	-11.9912	-0.00562	-5.73705	-1.95483	-2.84215	-1.46978	0.24453	0.74243	1.92495	5.4304	3.64502	5.42059	6.53736	8.11649	7.86565
4.09384	86.3107		4.09384	0	-0.96221	2.03175	3.39967		4.09454	81.7281		4.09454	0	1.08231	2.23585	-0.48284	-0.81756	-4.29927	3.10587	1.31731	0.77677	3.91098	-3.84025	1.99119	0.03012	3.00526	-0.40973	4.00099	4.46424	2.63933	3.56863	5.91169	6.70012	6.94335	4.67076	6.33311	7.06794
4.11391	64.5034		4.11391	0	-0.09186	0.59435	4.2628		4.1146	64.839		4.1146	0	-2.68239	-3.91347	-5.62159	-4.50604	-6.34346	-3.66468	-3.68956	-2.88504	-0.87128	-4.75971	-2.46674	-3.73988	-1.37007	-1.83404	-1.46928	-1.14579	0.21055	1.91794	0.39762	-2.18233	3.19338	1.5372	3.59221	1.20264
4.13397	53.8187		4.13397	0	-0.61008	0.52578	0.39383		4.13466	50.2132		4.13466	0	-0.28097	0.54016	0.08641	-1.96839	-3.48842	0.16576	2.09619	-0.2579	1.49711	-4.8203	1.47476	-0.72003	-0.29198	1.13782	0.46087	0.05978	1.13847	0.82066	3.07534	2.38026	3.09431	1.78842	4.0188	2.52801
4.15403	45.6351		4.15403	0	0.10522	1.19176	2.14247		4.15472	46.1594		4.15472	0	-2.47931	-0.98788	-3.77252	-4.01246	-4.39746	-4.46413	-1.87266	-2.40812	-1.16649	-3.74195	0.47897	-2.58773	-2.63284	-3.17585	-1.94236	-1.03332	0.64086	-0.65034	0.33261	-0.28261	0.61897	0.28174	1.31761	1.32606
4.17409	42.421		4.17409	0	-1.51894	1.6987	1.90275		4.17478	42.1469		4.17478	0	0.19636	-1.54429	-1.42825	-2.24074	-2.59623	-1.22754	-0.7425	-0.5714	-0.97964	-3.74563	-0.70988	-1.70762	0.27413	-0.33097	-0.89663	-0.03905	0.62421	0.82856	1.6728	0.64519	1.01638	2.38235	2.46789	0.87457
4.19415	41.8109		4.19415	0	-0.38573	0.30517	1.77473		4.19484	41.1552		4.19484	0	1.14497	-0.27247	-1.95523	-1.7451	-4.25711	0.6692	-1.36394	-1.30309	0.1206	-2.88056	-1.19195	-1.27372	-0.555	-1.37171	2.56017	0.27953	1.20268	1.34014	1.94088	1.8337	-0.40175	0.16488	1.36888	0.72182
4.21421	41.8541		4.21421	0	1.06717	0.2466	-0.74796		4.2149	41.3707		4.2149	0	-1.09721	-0.96203	-2.06358	-0.10742	-2.97159	0.32444	0.91564	-0.20441	-0.41882	-1.92799	0.06636	-2.0258	1.09376	-1.39255	0.53409	-0.24008	0.76961	1.49603	-0.92699	-0.0444	0.52178	2.19119	0.317	0.75246
4.23427	41.9995		4.23427	0	1.25671	1.85585	0.99601		4.23496	42.7943		4.23496	0	-0.40789	-3.03212	-3.63702	-0.9276	-3.97839	-2.39198	-1.4974	-2.59738	-1.14561	-5.1153	-1.96411	-4.32887	-0.46006	-1.71352	0.7246	-2.01123	-0.95863	0.20351	-0.09321	-1.05208	-1.01091	0.96517	0.21446	0.68995
4.25433	43.4102		4.25433	0	0.31036	0.57855	1.34172		4.25502	42.3629		4.25502	0	1.5971	-0.0146	-1.40893	-0.71146	-3.79745	0.51736	-0.48521	-0.83028	3.41241	-1.53971	-1.12092	-1.62288	-0.18063	-0.56856	2.1159	-0.88554	0.84421	1.13709	1.2372	-0.03014	2.35586	0.91347	3.08831	1.47316
4.27439	43.0466		4.27439	0	0.44047	0.72221	2.1186		4.27508	43.0312		4.27508	0	-0.32159	-0.53205	-1.99168	0.7746	-1.0937	-1.42225	0.1369	1.56024	1.89744	-2.92896	0.76802	0.26109	1.16717	-0.32883	1.18582	-0.35887	0.4806	1.10231	3.39586	0.63615	2.06034	2.88241	1.56218	1.92429
4.29445	44.718		4.29445	0	0.30892	1.44897	2.88266		4.29514	45.7697		4.29514	0	-0.36486	-0.59817	-0.90205	-1.70511	-3.28936	-0.90694	-0.85936	-2.4062	1.33399	-2.90556	-0.32332	-2.97039	0.11946	-1.48889	0.10509	-1.59863	0.29054	-1.22127	1.62328	2.4044	0.43913	1.63853	0.98087	0.22108
4.31452	46.6513		4.31452	0	0.51313	2.86707	3.57645		4.3152	47.5398		4.3152	0	-1.05702	-0.73032	-1.62421	-0.65256	-2.46809	0.12416	-0.43548	-0.27731	1.36617	-3.63334	-0.5547	-1.67275	-0.95683	-0.57792	3.02498	-1.24117	-1.13126	1.04821	1.07954	1.8811	0.99211	2.22005	1.10246	2.21004
4.33458	52.6847		4.33458	0	-0.63895	1.74909	2.25166		4.33526	50.4301		4.33526	0	-0.10985	0.28017	-0.40868	0.09872	-2.98686	-0.2667	-0.4651	0.81776	2.8668	-2.31659	3.64183	-0.98066	2.04882	0.59664	2.3161	-0.72192	3.75264	1.6738	3.38579	2.51335	2.19839	4.51707	4.63928	2.96901
4.35464	59.867		4.35464	0	0.54896	2.01083	3.54181		4.35532	62.314		4.35532	0	-3.43453	-4.98758	-2.92536	-0.42973	-8.30694	-3.359	-4.73492	-1.45864	-1.30071	-6.01857	-1.5021	-5.93514	-0.66579	-3.1144	-2.71808	-2.18182	-0.52989	-4.31407	0.04971	-1.10099	-1.55615	1.27026	2.08819	-0.9127
4.3747	78.9984		4.3747	0	-1.07442	-0.83699	0.79356		4.37538	74.1357		4.37538	0	0.7625	2.587	-2.15092	-0.16337	-3.87722	0.41983	1.36019	-0.20437	2.72057	-3.51562	1.62988	-3.87643	0.97388	0.99891	3.06414	-0.34451	-0.13438	1.02863	3.44156	2.52254	4.39166	5.09783	2.34849	1.04992
4.39476	102.826		4.39476	0	-1.97424	0.64225	3.07577		4.39544	103.276		4.39544	0	0.25406	-3.51447	-6.61182	-3.55422	-10.0883	-2.51772	-3.75431	-3.25737	-0.26379	-10.299	0.90213	-8.32366	-0.68055	-5.74105	1.47522	-4.24956	-0.83232	0.60503	-0.75259	0.51048	0.16193	0.13468	1.05181	-0.23558
4.41482	145.217		4.41482	0	-3.18709	-2.26457	1.87912		4.4155	140.766		4.4155	0	-3.99129	-3.26834	-8.28004	-0.96571	-13.6118	-4.13046	-4.39989	0.69907	2.65217	-12.2565	-4.20981	-3.72269	-2.62079	-2.84221	1.8329	-2.91068	0.46255	2.31238	2.37682	2.6187	3.33809	6.07536	2.80821	3.55818
4.43488	196.536		4.43488	0	-2.53597	2.44259	3.63715		4.43556	192.208		4.43556	0	-1.68534	-1.0698	-12.4385	-6.03871	-21.5661	-7.93119	-3.5763	-8.56498	1.72488	-21.9613	-7.08539	-15.3697	-0.73959	-8.42582	1.0419	-4.88372	-1.69456	-0.89139	5.84325	-1.28467	0.012	5.22643	4.05684	6.1333
4.45494	250.381		4.45494	0	-2.22579	-1.6658	3.6063		4.45562	246.523		4.45562	0	-5.05449	-1.59248	-11.9632	-6.59155	-27.8513	-10.9186	-17.4545	-8.76695	1.85711	-22.7226	-3.57898	-19.056	-3.2253	-8.42741	-0.74469	-2.62839	0.08652	-4.30441	8.98331	-0.097	-1.41172	6.12292	10.358	4.44875
4.475	297.834		4.475	0	-3.09617	-2.74475	6.42402		4.47568	286.703		4.47568	0	-3.38687	-4.35964	-12.173	-9.3237	-22.7733	-9.38146	-7.73413	-5.49724	2.06958	-22.6917	0.23532	-15.5576	-1.07083	-6.66163	4.92843	-1.30967	2.70019	5.2396	6.63905	3.04042	8.32177	11.1985	11.4901	12.525
4.49506	322.957		4.49506	0	-7.48634	-3.5975	2.86592		4.49574	306.009		4.49574	0	0.24655	-3.29988	-14.0277	-3.09551	-24.3514	-3.19716	-6.09063	-7.11791	4.44975	-25.8939	-1.01797	-16.2192	-1.08496	-4.56261	8.48263	2.16519	2.49433	3.60071	10.0181	10.0965	11.7583	13.98	13.5363	11.3956
4.51513	314.626		4.51513	0	-5.18296	-3.57672	2.32552		4.5158	298.481		4.5158	0	1.22091	-7.4089	-13.7059	-2.61312	-30.8754	-11.3337	-8.80016	-7.34378	8.95866	-25.6936	7.50739	-16.0924	1.17529	-5.31519	3.49025	2.70062	6.6693	8.8363	11.2979	12.2219	11.8151	12.7619	16.53	13.0396
4.53519	272.219		4.53519	0	-0.84546	1.2067	9.04476		4.53586	262.377		4.53586	0	-3.31598	2.18676	-12.6327	-1.39364	-20.7088	-5.09554	-11.3477	-7.732	5.21394	-23.3599	2.54265	-8.79978	-1.99873	0.90781	7.85482	-5.19257	4.59704	9.3882	12.9907	8.42116	5.50037	11.3474	16.1428	12.7335
4.55525	226.28		4.55525	0	-2.18584	-3.44347	0.44576		4.55592	210.391		4.55592	0	3.54589	-0.95588	-5.6427	-0.19525	-15.6052	-0.19176	-2.72404	0.45914	12.035	-14.0917	2.58023	-10.1051	2.40769	-2.21975	11.0645	7.4875	7.34062	8.92161	13.2862	7.76986	9.72009	13.7275	17.3702	16.067
4.57531	170.28		4.57531	0	0.21149	-0.25336	7.47151		4.57598	160.629		4.57598	0	1.67255	2.14831	-7.39884	2.89483	-10.8682	-2.42393	-5.31366	-1.67186	6.17882	-10.253	4.05748	-3.22629	6.38903	3.45676	7.79737	1.56942	6.95159	6.51493	11.909	8.57115	9.24237	16.6734	12.9661	6.97938
4.59537	125.591		4.59537	0	1.31318	-0.36932	3.21757		4.59604	123.638		4.59604	0	-4.19717	-3.74798	-6.31488	-4.50202	-12.7011	-2.34502	-4.88788	-5.00743	-0.13224	-11.2804	-0.7572	-10.0001	-1.16539	-3.74683	2.90498	-3.24275	-0.3538	0.44183	1.90257	4.9575	3.72629	3.90503	5.84887	2.44168
4.61543	97.141		4.61543	0	-0.53258	1.10575	-0.02135		4.6161	94.8		4.6161	0	-2.0282	-0.85789	-6.68988	-2.5768	-10.1142	-2.70442	-2.54887	-3.54924	2.01169	-7.68839	0.38378	-3.96691	-0.35561	-1.22227	1.33403	-2.8104	0.30383	0.56394	2.08949	-0.42099	2.7021	4.93944	3.62932	5.00918
4.63549	83.6359		4.63549	0	-3.35866	-1.70206	-2.41233		4.63616	77.3703		4.63616	0	2.63785	0.58082	-2.64773	2.95866	-4.2624	-3.05172	-0.60545	0.69695	0.66286	-8.28052	-0.58605	-2.43397	1.20709	-0.74372	2.73106	0.96062	-0.0808	1.92103	4.2157	2.52586	3.041	4.28144	4.86024	2.6979
4.65555	72.6454		4.65555	0	-2.08763	-0.94993	-0.92723		4.65622	71.5262		4.65622	0	-3.89332	-1.65691	-3.45499	-1.10938	-7.365	-1.92642	-4.4403	-3.10971	-1.66444	-8.38873	-1.20026	-5.92281	-1.85767	-3.31041	1.31101	-0.40576	-1.59657	1.89087	-0.1747	-1.64979	-0.03237	0.30049	2.1856	-0.66994
4.67561	69.2144		4.67561	0	-1.88423	-2.56641	-2.13128		4.67628	65.2258		4.67628	0	-0.13711	1.92809	-1.21806	-1.81171	-3.97565	-2.21966	-0.93603	-0.08355	1.39555	-3.63786	1.76258	-4.12692	-0.60768	-0.81542	2.02676	-0.40304	-0.50203	1.72738	2.61886	2.35357	-0.06414	2.73231	2.3475	2.9935
4.69567	63.3407		4.69567	0	0.76425	-0.39479	2.25168		4.69634	63.6959		4.69634	0	-0.93557	-1.41273	-2.5748	-2.15638	-4.35406	-1.68101	-1.87965	0.11061	0.57931	-6.06163	0.34512	-2.57552	-0.96404	-1.70713	-1.0897	0.04092	-1.17284	0.61523	-0.47615	1.65173	2.49546	2.50402	2.15962	2.03701
4.71574	63.6898		4.71574	0	0.98194	-0.34857	0.81082		4.7164	65.2057		4.7164	0	-3.78245	-4.64654	-5.38943	-4.14001	-7.35453	-3.34174	-3.56149	-1.52825	-1.47551	-7.86811	-4.09041	-3.93542	-4.46783	-4.14664	0.25812	-5.35596	-3.50915	0.74297	-1.83181	-2.13326	-1.31467	-2.10451	1.68315	-1.33712
4.7358	63.2532		4.7358	0	3.29306	2.21065	2.3688		4.73646	65.0976		4.73646	0	-2.89784	-1.37043	-4.34049	0.0621	-4.66973	-1.76855	-3.49641	-2.32502	-4.14846	-6.76246	-2.48697	-5.28594	-1.36869	-4.18992	-2.64431	-0.05775	-2.05136	-0.656	-1.87856	-0.51558	0.41463	0.94858	1.7481	-0.59555
4.75586	66.8731		4.75586	0	0.10945	0.38951	-0.52779		4.75652	65.3784		4.75652	0	-0.95791	-1.15546	-3.5947	-0.34773	-6.50133	-2.00606	-0.93809	-1.78726	1.37538	-7.23453	-2.94117	-5.3312	0.28014	-2.13561	1.74329	-0.83804	-0.24149	-1.50392	-0.09956	-0.22764	1.36089	-0.03546	3.66854	1.05455
4.77592	67.8761		4.77592	0	0.51563	2.32628	1.87908		4.77658	68.7633		4.77658	0	-1.08728	-1.80343	-4.92628	-3.17306	-6.69769	-3.23633	-2.49475	-0.34697	-1.18445	-6.6023	-1.42811	-4.72584	0.38471	-3.16375	0.0164	-2.37705	-0.96846	-1.02375	1.57952	0.76301	2.64255	-0.07974	1.62635	1.50022
4.79598	70.9878		4.79598	0	3.52254	2.03883	3.0915		4.79664	73.4217		4.79664	0	-1.75743	-2.88428	-6.76187	-1.10882	-6.95179	-1.51667	-3.53961	-3.86338	-1.86371	-6.88314	-2.05557	-6.29433	-2.64785	-3.54112	-0.08298	-1.86655	-1.03288	-0.65991	2.22625	-0.98578	2.51931	4.00961	-1.86475	3.36729
4.81604	80.1317		4.81604	0	-2.90751	-0.62587	-0.13365		4.8167	78.7303		4.8167	0	-3.48705	-2.7189	-4.20029	-2.36642	-7.23778	-3.48515	-3.40644	-0.55531	0.97644	-7.62145	0.54618	-4.65188	-1.04152	-1.67136	1.74149	-2.70212	-2.37754	0.73596	2.13403	3.06904	3.28048	4.12998	3.17036	3.40519
4.8361	88.3017		4.8361	0	-1.66194	-1.39121	0.83348		4.83676	86.1912		4.83676	0	0.04769	0.27265	-5.24553	2.49825	-6.30761	-2.11131	-0.242	-2.67401	-0.74575	-6.07125	2.85942	-2.33058	0.79709	-0.20256	2.06831	-0.43408	0.87585	-0.32654	2.4339	1.9966	3.77304	4.36094	2.40087	3.8364
4.85616	99.7442		4.85616	0	-1.3767	-0.25524	0.01746		4.85682	99.9115		4.85682	0	-4.29413	-2.77962	-7.93086	-3.29286	-10.8308	-4.43284	-9.16581	-3.85674	-3.3145	-13.1399	-1.56355	-8.32754	-3.75397	-5.72828	0.52012	-4.55555	-1.08385	-0.50797	1.66865	0.70276	2.10376	-1.40252	0.14878	-1.37635
4.87622	107.754		4.87622	0	0.0582	2.41247	3.34321		4.87688	109.488		4.87688	0	0.09937	-3.62827	-5.95939	-3.324	-11.0272	-6.25264	-1.87966	-1.60724	-1.06639	-12.2839	-2.64482	-7.43533	-5.33265	-4.88354	-0.50538	-4.88157	-1.84049	-0.10475	1.91326	0.38001	3.67854	1.35086	0.54136	3.44259
4.89628	122.248		4.89628	0	-2.39179	-0.65566	0.61304		4.89694	119.948		4.89694	0	-2.81454	-3.39908	-8.16471	-0.96379	-11.7666	-1.3492	-5.04846	-4.09688	1.70887	-14.6685	-3.41769	-9.44288	-3.849	-4.36002	-1.01855	-1.11751	-0.38791	2.2753	2.60951	-0.38864	1.26055	3.1985	3.04564	2.85528
4.91635	127.991		4.91635	0	-2.8441	0.97449	1.30556		4.917	126.915		4.917	0	-3.01168	-4.80588	-6.38413	-4.59102	-14.0629	-6.8939	-7.04706	-5.65714	0.72226	-12.1118	-3.62299	-10.9825	-4.61619	-5.25144	-0.83054	-4.48005	-2.32443	-1.78724	1.53926	0.27921	0.03337	1.72624	4.90443	0.59575
4.93641	128.325		4.93641	0	-2.39424	-0.14802	2.18208		4.93706	124.63		4.93706	0	-0.48867	0.84177	-5.70279	-2.8436	-12.0283	-2.84132	-4.84735	-1.58363	1.56976	-11.104	-0.88222	-7.02313	2.15597	0.55852	1.5861	-1.75986	3.88055	0.60748	5.22558	3.0025	0.9383	7.28744	4.96879	5.09344
4.95647	124.443		4.95647	0	-4.52624	-2.64438	0.52857		4.95712	118.375		4.95712	0	-1.09007	1.04109	-5.11551	-1.39367	-8.66468	-6.75673	-0.29139	-1.05849	2.5891	-9.31216	1.68867	-7.33312	1.14966	-3.02405	2.9114	1.54222	3.27577	0.68281	6.06808	4.70783	2.13264	1.80497	6.60023	3.87627
4.97653	111.389		4.97653	0	1.23155	0.71095	3.91524		4.97718	106.06		4.97718	0	2.62281	2.94662	-1.82465	1.44059	-5.75439	2.43366	1.72071	-0.35437	5.7752	-6.68611	0.7185	-1.73302	0.52322	1.22584	9.72905	0.11114	1.60934	7.69109	6.06498	7.61528	8.59725	7.17504	7.90968	7.79646
4.99659	100.092		4.99659	0	-1.71196	0.10011	0.40807		4.99724	96.8481		4.99724	0	-0.82098	0.26204	-4.0118	1.90361	-7.5453	-2.66237	-1.95137	-0.47055	0.33194	-9.31203	2.34498	-3.59067	1.36803	-1.95145	2.05636	-0.42864	0.17272	2.42481	4.53538	4.33499	6.78818	5.46344	3.54245	6.07939
5.01665	90.3816		5.01665	0	-1.15312	-0.69504	0.4502		5.0173	85.5045		5.0173	0	-0.23557	0.87302	-2.01365	2.47369	-8.19995	0.23436	0.10052	-3.02108	4.30942	-4.53654	2.37584	-4.96895	-0.38018	0.37605	2.0135	-2.26641	1.08316	1.62659	5.7284	4.58635	3.1449	1.90544	4.93681	7.4224
5.03671	81.4694		5.03671	0	-3.02303	0.04054	1.76087		5.03736	76.5749		5.03736	0	0.24218	1.7857	-2.06627	0.84448	-4.80078	2.26891	0.21158	-0.70493	1.08925	-4.68192	2.76661	-1.8536	1.46088	0.09488	3.26434	2.68964	4.02591	4.28885	2.46972	3.34307	4.07747	7.25224	7.17437	5.4285
5.05677	75.1748		5.05677	0	1.51299	1.40684	2.13709		5.05742	74.4584		5.05742	0	-2.06079	-3.61937	-3.69225	-1.8435	-9.3902	-3.09195	-2.8772	-3.09078	0.79291	-9.08837	-0.46993	-5.25043	-1.0832	-2.30756	0.03634	-1.40515	0.80652	-0.53913	1.32023	0.12149	1.28589	1.98396	-1.62705	2.22037
5.07683	71.5407		5.07683	0	-0.50479	0.16744	8.47225e-05		5.07748	67.0174		5.07748	0	-1.66985	3.32603	-1.14858	2.92571	-2.07484	2.15134	-0.25407	0.38678	4.0389	-3.68701	3.46024	-1.73512	2.19573	-0.48809	4.85971	2.25649	3.08536	4.23784	2.25213	5.48414	2.83298	4.08427	8.32327	6.58458
5.09689	70.7693		5.09689	0	-1.76755	-1.16748	-0.63086		5.09754	69.0666		5.09754	0	-2.14522	-1.95578	-5.40082	-4.14438	-8.05145	-3.06538	-4.97039	-3.14888	1.10025	-7.75607	-1.29796	-5.58654	-2.51966	-4.91564	-0.72324	-2.68027	-1.22875	-0.97763	1.78081	0.41599	0.36757	0.16651	-1.09928	1.46161
5.11696	69.2576		5.11696	0	-2.44924	1.38458	-0.89012		5.1176	66.7579		5.1176	0	-0.39696	-1.60826	-4.01168	-1.64145	-5.16187	-1.70491	-1.11307	-1.46479	0.95204	-4.59781	-3.28038	-4.99472	-0.08071	-1.82862	0.56019	0.14986	1.29716	1.2871	3.71772	0.82117	0.68227	1.55241	2.06818	2.38536
5.13702	69.403		5.13702	0	-3.59667	-1.52663	-0.63668		5.13766	67.0611		5.13766	0	-0.11856	0.37294	-1.83396	0.16726	-7.13782	-1.55565	-2.7929	-0.73415	1.14602	-6.15327	-1.93652	-2.78746	-1.16437	-3.12641	-0.07013	-1.34813	-0.22474	0.85303	0.97999	0.60566	-0.82612	0.41413	1.25996	3.31215
5.15708	67.9649		5.15708	0	-2.44988	0.4232	0.88952		5.15772	67.5127		5.15772	0	-2.89783	-3.87174	-2.82061	0.85713	-6.98835	-3.12775	-4.70704	-1.98271	-1.08599	-8.4971	-3.01659	-5.85622	-5.04061	-2.51851	-2.42	-2.81977	-3.22503	-0.0136	0.44061	-2.29644	-1.67177	2.26972	-1.56954	1.45431
5.17714	67.7459		5.17714	0	-2.68185	-0.8347	-0.42699		5.17778	66.3948		5.17778	0	-4.51849	-1.33137	-3.41355	-2.8514	-6.71407	-1.4279	-2.12655	-1.94183	2.4859	-7.12401	-2.80891	-4.24476	-1.19205	-3.00063	-1.52002	-1.76755	0.20173	-0.70789	1.51502	-1.65936	-0.05008	-1.13977	-0.56325	0.39419
5.1972	69.2723		5.1972	0	-4.00289	-3.32674	-1.98184		5.19784	65.1398		5.19784	0	-0.95628	-0.42124	-1.43129	0.68747	-4.92138	-3.31893	-1.30168	-2.02235	1.98172	-4.93413	-1.48886	-2.86118	-1.88797	-1.16181	1.56756	1.8764	0.28069	0.30699	0.18348	0.38314	0.37281	2.53275	2.80643	2.45917
5.21726	69.2731		5.21726	0	-1.20065	-2.43418	0.09777		5.2179	65.6578		5.2179	0	-1.86278	-1.19787	-3.3178	-1.81229	-4.71871	-3.08285	-0.37858	-3.14369	0.09719	-6.55726	-1.11831	-5.65294	-2.08063	-1.4204	1.7913	-1.00875	-2.1314	0.61856	2.29428	1.02436	-1.37323	1.77316	0.81314	1.61505
5.23732	68.0359		5.23732	0	-1.76501	0.39714	0.02171		5.23796	65.9386		5.23796	0	-1.47501	-1.1338	-3.51296	-0.47812	-4.80279	-2.50162	-2.53067	-3.46744	1.31372	-3.5859	-2.1793	-2.67277	-2.23099	-1.42008	-0.7582	0.42604	-0.97559	1.99763	3.6154	-0.54712	1.45762	0.56898	0.00396	1.30813
5.25738	67.7466		5.25738	0	-0.7943	0.394	-0.84056		5.25802	64.5377		5.25802	0	-0.3112	-2.34056	-0.63656	2.58269	-4.73884	-0.28202	1.17163	0.92751	3.2576	-1.88745	2.47238	-1.61564	0.77336	-0.99219	1.31841	1.15372	2.51655	1.91322	0.41219	3.08537	2.63952	3.2667	1.97741	2.14083
5.27744	69.069		5.27744	0	-2.2313	-1.52861	-0.56892		5.27808	67.4281		5.27808	0	-2.16669	-0.48976	-3.6555	-2.50553	-1.92446	-1.85796	-0.72919	-4.4186	0.2169	-5.62855	-2.34679	-4.93511	-0.94601	-4.18523	3.09658	-0.82514	0.88988	-1.28271	1.40389	-0.11126	-0.22879	0.9037	2.32393	1.13941
5.2975	70.9158		5.2975	0	-2.10239	-1.60455	-1.67758		5.29814	66.6511		5.29814	0	2.12473	1.1278	-2.92111	2.62411	-4.94947	-3.1497	-2.06018	0.04208	2.73026	-4.7459	-0.18288	-3.42847	1.3483	0.46195	0.12149	1.21184	1.90511	1.00126	2.99114	1.27794	1.16184	1.98843	3.71467	3.76344
5.31757	70.5656		5.31757	0	-1.82633	0.01844	1.03399		5.3182	68.247		5.3182	0	1.84359	-2.25686	-1.33082	0.55368	-4.79328	-2.59054	-0.55885	0.32034	1.52592	-4.89614	0.64855	-3.3723	-1.04981	-0.89612	-0.03461	-1.59951	-1.2805	-0.02722	2.38034	2.65769	2.65482	4.17282	2.09743	2.16576
5.33763	71.2059		5.33763	0	1.24002	-0.78304	1.55998		5.33826	69.3906		5.33826	0	-0.33472	1.16837	-2.28151	-0.86932	-4.1122	-2.61373	-0.28285	0.8139	0.29607	-4.12584	3.23257	-4.17282	0.08244	-0.09375	2.02848	-0.72384	2.58487	2.25782	-0.12077	2.78309	4.20663	0.85378	3.17617	0.07744
5.35769	74.5343		5.35769	0	-2.00075	-2.0785	1.30177		5.35832	72.6681		5.35832	0	2.68308	-1.95829	-3.07849	-3.65177	-4.58083	-1.49523	-5.41012	-0.9342	0.94987	-7.42625	-1.90873	-3.80348	-3.25985	-3.17664	0.64883	-1.0913	-2.43482	0.22478	1.73234	-1.93851	1.98094	0.69742	1.81413	1.35437
5.37775	73.0086		5.37775	0	1.20955	0.23671	2.22225		5.37838	75.4934		5.37838	0	0.63426	-3.16718	-2.31084	-6.34816	-8.32334	-3.60989	-3.43891	-3.45782	0.36727	-8.78299	-3.84551	-5.70584	-4.13427	-5.18035	2.25168	-2.70053	-3.5827	-1.77035	-1.22643	0.22407	-0.40662	1.41056	-1.82374	-0.01592
5.39781	73.7941		5.39781	0	3.31558	2.84566	3.91649		5.39844	74.3285		5.39844	0	3.99798	-0.83853	-2.68604	-1.08897	-5.21657	-0.52711	-1.52123	-0.65574	0.03094	-2.96451	-0.12324	-2.33128	-1.23497	-2.2425	-1.36099	0.11501	-1.43833	-0.08161	1.78037	0.55757	0.97728	0.70727	2.02718	0.90498
5.41787	75.8287		5.41787	0	0.45235	-1.01812	0.1844		5.4185	74.4794		5.4185	0	2.38102	1.83373	-2.62266	0.29	-7.07189	-2.22947	-0.61815	-1.1728	0.68608	-4.88014	3.34509	-2.33245	-0.49726	-0.40423	-0.4208	1.89609	1.21991	2.75927	0.50969	0.42855	0.45407	3.28172	4.11812	-0.30537
5.43793	75.0443		5.43793	0	-0.05615	3.52574	1.20493		5.43856	74.5229		5.43856	0	4.86004	1.3162	-4.01374	-0.50755	-5.25035	-0.80751	-2.14579	0.63635	0.83707	-6.75215	0.11579	-3.70562	-1.23468	0.00636	1.848	0.05059	2.43983	0.83817	2.06631	3.95152	1.3958	3.69921	3.23908	0.63559
5.45799	76.3823		5.45799	0	-2.35247	-0.29862	0.97364		5.45862	74.0703		5.45862	0	1.15167	-0.40791	-1.82902	-2.27438	-4.53432	-0.31192	-3.47838	-2.01325	-0.55829	-5.40666	1.00172	-4.08951	0.28035	-1.66001	0.33714	0.02596	0.56186	0.83169	1.73146	2.93823	3.07658	2.17394	2.96626	2.60983
5.47805	76.4825		5.47805	0	-2.01766	-0.57399	-1.17811		5.47868	71.891		5.47868	0	4.02048	2.09455	-2.75003	0.72386	-2.4801	-0.52442	-1.47118	0.66154	4.18761	-3.35603	1.07897	-0.2372	2.78451	-2.46442	2.40742	0.83653	3.1985	3.81899	2.68416	1.92347	4.42292	3.01282	3.95758	2.43844
5.49811	75.3639		5.49811	0	-0.94218	-0.43556	0.45744		5.49874	71.4177		5.49874	0	1.60519	-0.25532	-1.65677	0.11993	-3.79411	-2.11971	0.16356	0.55345	2.09375	-3.85864	3.32928	-2.18846	0.72151	-1.55876	4.05879	2.11374	3.27966	4.31424	1.70851	3.27148	3.36264	1.39786	5.11152	3.24208
5.51818	73.7795		5.51818	0	-1.56687	1.04709	-1.02834		5.5188	75.2574		5.5188	0	-2.10559	-4.71998	-4.55549	-5.70213	-9.16157	-2.81341	-4.14935	-5.76375	-2.18046	-8.7816	-3.91288	-5.79157	-4.22299	-5.50651	-3.0312	-4.0717	-3.60861	-3.67479	-0.96984	-4.81227	-2.64662	-2.81523	-2.1382	-2.33573
5.53824	74.5932		5.53824	0	-2.46838	-1.18747	-1.14857		5.53886	70.3818		5.53886	0	-1.13205	2.00916	-1.6262	-1.08467	-1.76492	-1.04065	0.23162	0.23209	1.86788	-5.01099	0.78937	-2.43937	1.88798	1.92046	0.81938	1.78071	1.89937	-0.93899	3.55746	1.74771	1.26565	1.04923	1.12984	4.03248
5.5583	74.8119		5.5583	0	-2.78745	-3.36561	-5.02732		5.55892	72.2373		5.55892	0	-0.12017	1.33895	-4.31558	-2.31599	-5.76147	0.29288	-4.52757	-4.42387	-1.05022	-6.69879	-3.21167	-1.93488	2.11333	-2.48636	0.55619	-2.31152	-1.11001	0.69946	0.53687	-0.06371	-0.72191	-0.56432	-1.43067	2.00545
5.57836	74.7394		5.57836	0	-3.61555	-4.91729	-2.25359		5.57898	72.1517		5.57898	0	0.09512	-0.96771	-6.71105	-2.48849	-6.32189	-0.87148	-2.14054	-1.75321	-0.44458	-5.61235	-4.75151	-4.57407	-0.53269	-3.11434	-0.25281	-0.31479	-0.76384	-3.25509	-0.86691	0.87495	-1.0088	-0.21546	2.30841	-0.34998
5.59842	72.471		5.59842	0	0.36796	1.33123	-0.25137		5.59904	70.6854		5.59904	0	0.31063	2.7183	-4.36765	-0.18221	-6.00103	0.29326	-3.16931	-0.43788	1.13115	-4.44414	-1.61647	-3.75129	-0.60491	-0.32914	-0.92415	-0.43365	1.50769	0.26439	0.36161	0.45987	1.11493	1.38303	1.68313	1.22407
5.61848	73.5169		5.61848	0	-2.23459	-3.32824	0.94638		5.6191	70.2316		5.6191	0	0.13929	2.43953	-2.33162	0.18541	-3.53306	-1.12753	-1.96266	1.24379	2.62856	-5.94353	0.54949	-3.06158	-1.47359	-1.77796	0.53318	-0.17504	-0.28227	0.80553	0.6807	-0.04924	1.9418	0.65024	2.11467	2.0947
5.63854	72.0635		5.63854	0	-0.32942	-0.54574	-1.42293		5.63916	71.9359		5.63916	0	-1.00465	-1.37703	-3.77922	-0.07501	-7.56675	-0.93555	-5.28008	-1.25752	-0.85721	-8.26577	-1.97832	-3.07082	-3.0044	-2.83364	1.27202	-2.6389	-1.78891	-1.5759	-0.67348	0.54402	-1.7573	-0.17499	0.3896	0.48134
5.6586	71.148		5.6586	0	-0.19901	1.2364	0.46669		5.65922	70.8134		5.65922	0	0.78678	-0.18977	-3.27677	-1.64587	-6.47098	-4.03656	-3.49079	0.25283	-0.19155	-4.78394	-1.37603	-3.14995	-0.38618	0.73212	0.06035	-1.08288	-1.10228	-0.91213	0.99994	0.90068	-0.02057	2.26643	2.28216	0.9868
5.67866	71.4386		5.67866	0	-0.98287	-0.5481	-0.54697		5.67928	71.7173		5.67928	0	-2.72602	-2.77465	-5.89156	-4.74798	-5.60921	-4.89738	-4.48078	-2.86997	-1.59685	-6.30454	-1.97654	-6.60735	-0.94359	-2.5934	1.20672	-3.37712	-2.94352	-2.75504	-1.41797	-1.60039	-0.96821	-1.64909	-0.64701	0.08075
5.69872	71.7149		5.69872	0	0.03311	-2.41834	0.10606		5.69934	71.4596		5.69934	0	-3.15837	-1.11617	-3.40947	-0.84827	-6.53351	-3.06672	-2.63147	-3.19385	-1.44657	-7.44978	-2.6291	-5.61963	-3.43856	-5.38442	0.28664	-2.81448	-0.98714	-2.34453	-2.03597	-2.17409	1.37094	1.11442	0.75689	1.24383
5.71879	72.0788		5.71879	0	0.40994	-0.16453	-1.15794		5.7194	70.4911		5.7194	0	-2.3622	-0.4924	-3.48926	-3.30644	-3.58363	-0.22329	0.59546	-4.03484	-0.5636	-3.86743	-3.43761	-4.32927	-1.34291	-2.79418	3.39299	-1.10762	1.39731	-0.74263	0.90332	1.57292	3.01864	2.19266	2.01099	1.17804
5.73885	74.2591		5.73885	0	-3.39703	-2.46074	-0.74048		5.73946	72.5591		5.73946	0	-2.66234	-1.93547	-5.45024	-2.35753	-7.10172	-3.08877	-4.785	-5.69351	-0.8068	-9.22953	-1.64805	-5.77525	-2.43502	-4.14876	-1.1839	-2.32902	-1.78083	0.05018	-0.68092	0.5331	0.00714	-0.35884	1.04289	-0.82481
5.75891	75.6247		5.75891	0	-3.09071	-2.0722	-2.44567		5.75952	73.5323		5.75952	0	-1.76004	-0.40869	-5.9529	-2.0588	-6.50554	-1.66996	-3.3275	-1.79815	0.85026	-7.39671	-1.71094	-5.18253	-3.2354	-3.71649	-1.93879	-1.15262	-0.29427	-0.98848	-0.45154	1.00412	0.80985	0.29435	0.22491	3.654
5.77897	76.6137		5.77897	0	-0.8722	-2.84176	1.15568		5.77958	74.674		5.77958	0	1.66895	-0.25722	-1.72658	-1.92962	-5.45318	-0.05371	-0.232	-1.34588	0.20606	-5.01109	-0.29533	-4.17883	0.11049	-0.79336	0.47543	-0.73008	0.4369	-0.92932	2.63956	1.3934	2.14325	2.45014	1.25997	2.51409
5.79903	82.0076		5.79903	0	-2.80638	-2.96968	-1.28605		5.79964	77.9111		5.79964	0	0.26446	-0.13238	-2.84646	-2.45147	-3.57315	-0.2957	-1.59793	0.75932	-0.6595	-6.67482	0.86691	-6.25782	-1.48016	-1.02515	0.94648	0.44092	0.24937	-1.28382	1.17504	0.56284	0.61595	2.20165	1.59162	2.53065
5.81909	86.6878		5.81909	0	-2.8077	-2.44314	-0.47625		5.8197	83.4107		5.8197	0	1.55591	-0.26567	-2.03749	0.17209	-4.84518	-0.30056	-2.15043	-1.85351	0.62343	-5.33286	0.35192	-4.22703	-0.4544	-2.67608	1.2931	-1.01955	-1.17703	0.24812	3.78808	0.6201	2.32458	3.66972	2.1652	3.37726
5.83915	91.3553		5.83915	0	-1.96831	-0.62704	0.06693		5.83976	88.5447		5.83976	0	1.10071	0.72094	-3.66409	-0.00637	-8.99988	-1.40506	-5.28413	-2.74392	1.35811	-6.61815	0.00742	-2.58181	-5.11128	-2.75065	-0.13223	-2.39625	0.15626	-0.38741	4.17875	1.39342	3.04115	-0.95924	1.45571	2.31913
5.85921	94.4515		5.85921	0	-1.01129	-0.77079	1.67936		5.85982	94.3449		5.85982	0	-2.58664	-2.23454	-5.87152	-4.27645	-9.26021	-4.85655	-4.18001	-5.76544	-0.78884	-10.6374	-2.67199	-6.08645	-2.63152	-5.37255	-0.28297	-1.09652	-1.94209	-0.77168	-0.69807	-3.35644	-1.29179	0.42735	1.2247	2.87193
5.87927	97.1415		5.87927	0	-1.39052	-0.91358	-2.32434		5.87988	92.0394		5.87988	0	0.27945	1.19151	-0.50799	-2.01381	-7.20719	1.15505	1.13672	1.45171	0.94587	-3.71678	0.13198	-3.52334	1.86358	-2.65622	0.82258	1.55736	1.82101	4.32872	2.15255	2.36159	1.03638	3.37024	2.05438	3.04309
5.89933	96.6908		5.89933	0	-2.56661	-2.56918	-1.78536		5.89994	92.4281		5.89994	0	-0.95024	-2.06352	-2.20056	0.37688	-6.3599	-2.20735	-4.09141	0.84747	-0.26829	-7.14507	-1.96881	-5.73546	-2.53552	-0.55845	1.37178	-0.26477	0.71445	0.46803	4.08655	0.72599	3.14383	0.56448	4.74841	1.99163
5.9194	95.0474		5.9194	0	-3.99002	-3.47285	-3.69885		5.92	88.4356		5.92	0	-0.66584	-0.6571	-4.1966	-2.82802	-5.29849	-1.83459	-0.74426	-1.1487	1.90195	-6.10751	-1.14043	-3.50265	-0.49386	-0.3497	1.00173	-1.07142	2.2681	0.46406	4.61634	1.69917	1.90038	2.27087	2.8847	3.30619
5.93946	88.3459		5.93946	0	-2.47417	-4.27554	-2.70931		5.94006	82.6335		5.94006	0	0.63028	0.8346	-2.69321	0.15199	-7.9832	-2.02274	-2.06152	-3.18785	2.66047	-7.82988	-1.10307	-5.89555	0.34448	-1.81241	-1.09292	-0.89408	1.62436	-0.35063	0.97327	1.44133	1.04289	2.7762	3.31725	4.55925
5.95952	79.6951		5.95952	0	-0.56595	0.49993	0.65759		5.96012	73.2064		5.96012	0	5.1845	2.74048	-1.13603	5.29084	-3.85855	3.89189	1.06363	3.39611	3.74128	-1.62986	4.85653	-0.60888	3.57193	2.66341	5.17132	2.10537	6.36965	6.47788	4.87566	6.2742	6.37239	6.11527	6.97652	7.30256
5.97958	76.8024		5.97958	0	-2.365	-2.72301	-2.6931		5.98018	73.9614		5.98018	0	-3.67733	-1.85072	-3.87955	-3.97564	-8.92391	-3.43514	-3.95024	-2.20587	0.44317	-5.19105	-4.45902	-4.21695	-5.29012	-2.58889	-1.01519	-1.90707	-2.37769	-0.71907	0.89737	0.11563	-1.08713	0.52483	-0.44693	0.41095
5.99964	70.2468		5.99964	0	-0.50376	-0.74546	-0.09308		6.00024	66.5629		6.00024	0	0.38016	-0.31416	-2.2984	-0.17544	-5.03367	-0.02324	-0.10073	0.69055	3.0378	-5.05998	1.29239	-1.6243	-0.471	-2.0444	2.98024	-0.19838	-0.27153	0.28112	0.49228	0.36008	2.56441	2.539	1.3827	3.32632
6.0197	67.0485		6.0197	0	-1.09814	-0.85424	-0.3784		6.0203	65.2698		6.0203	0	-0.99991	-0.98221	-4.34149	-1.14432	-4.79302	-2.52237	-2.05536	-1.61387	0.6557	-5.53088	-0.18845	-2.79808	-0.41354	-1.37828	-0.35131	-2.1404	0.17308	-2.0289	1.10452	0.31867	1.05365	1.59007	-1.43876	4.11248
6.03976	66.8454		6.03976	0	-2.39107	-2.62584	-1.44487		6.04036	64.3002		6.04036	0	0.52987	-1.62894	-2.45235	-1.35989	-2.50199	-2.88863	-2.24721	-0.60119	1.10415	-5.53896	-2.8164	-2.42895	-2.08859	-5.03566	-1.21404	-3.25591	-2.14703	-0.77508	-0.18204	-0.92141	1.0366	1.10904	-0.44809	-3.02908
6.05982	64.9111		6.05982	0	-0.25296	-2.40244	0.16513		6.06042	62.1644		6.06042	0	0.22977	0.46358	-1.57793	1.61577	-3.85637	1.01386	-0.71369	-0.74889	2.85085	-3.50796	1.4649	-1.53716	1.23977	0.40821	-0.19082	1.4422	3.40786	0.24655	2.39289	3.44578	1.02504	0.18956	1.48985	2.75161
6.07988	64.9109		6.07988	0	-0.45646	0.23056	-0.92664		6.08048	64.1698		6.08048	0	-3.54355	-1.06763	-3.2414	-3.87984	-7.03693	-1.03451	-2.56862	-1.63408	-0.26549	-4.43023	-1.49413	-4.07967	-3.10654	-0.64587	0.42159	-0.45464	-1.49387	0.01007	-0.29294	-0.94403	-1.08946	-1.46449	-0.05321	-0.37422
6.09994	66.1899		6.09994	0	-1.10984	-0.42123	-0.31732		6.10054	65.443		6.10054	0	-1.7988	-1.39264	-2.54706	0.44901	-7.61621	-3.44981	-2.55131	-1.89477	-1.40763	-4.85468	-1.07692	-3.31448	0.23694	-3.04343	-1.65901	-1.35831	-3.2467	-2.63875	-0.75606	0.42977	0.06893	-1.02301	0.83022	-0.08427
6.12001	67.7163		6.12001	0	-2.60779	-0.93605	-0.83965		6.1206	65.6792		6.1206	0	-0.5257	-0.91753	-3.10382	-1.57563	-4.69681	-1.78964	-3.00264	-2.62663	0.70486	-4.98478	-2.04992	-2.71413	-1.12658	-1.22555	0.67879	-0.26996	-0.34424	-0.12351	2.03326	0.63115	-0.97837	-0.27033	2.90455	2.1852
6.14007	68.6041		6.14007	0	-1.02503	-0.21501	0.33921		6.14066	68.6145		6.14066	0	-1.02462	1.47026	-3.30208	-1.04173	-4.21658	-2.24708	-3.65788	-1.31783	0.72516	-8.0046	0.21609	-3.1395	0.18712	-1.63115	0.40494	-0.36045	1.1604	-0.26375	1.2678	0.03656	0.62294	3.36608	0.98098	1.86744
6.16013	76.4253		6.16013	0	-2.36554	-2.46177	-1.6373		6.16072	76.3984		6.16072	0	-3.74213	-3.31796	-4.60599	-1.21912	-6.92158	-1.99364	-3.52668	-2.91941	-0.73239	-7.82018	-4.33871	-9.48564	-2.78519	-5.67456	-3.56154	-4.58308	-5.18489	-3.76743	-1.86852	0.56608	-0.9386	1.18686	-2.7513	-2.31281
6.18019	85.4813		6.18019	0	-1.61523	1.88038	3.52017		6.18078	87.2085		6.18078	0	-2.65108	-1.99447	-2.86236	-1.66499	-8.49251	-5.67128	-4.44254	-4.89755	-0.7205	-7.83299	-1.40868	-6.90847	-3.90556	-2.38741	1.37815	-1.95038	-3.53829	-3.1127	-0.86451	-1.84282	-0.6184	-0.21666	-0.68431	-0.85263
6.20025	111.984		6.20025	0	-1.65835	1.25659	-0.25232		6.20084	113.477		6.20084	0	-4.23388	-0.91452	-6.52593	-4.51173	-11.3177	-4.57388	-7.02982	-1.45981	-3.70935	-11.4052	-2.47246	-12.154	-6.69848	-8.3533	-4.07953	-2.02904	-3.60849	-5.49128	-4.99465	-1.96796	-3.66114	-3.34103	-0.91577	0.46623
6.22031	163.958		6.22031	0	-4.05825	-2.41339	1.45589		6.2209	168.331		6.2209	0	-2.27765	-7.1055	-8.4926	-8.47078	-18.7862	-9.8247	-11.2737	-9.69763	-5.56888	-19.611	-7.43737	-15.2841	-10.3524	-7.09955	-9.02293	-11.9963	-8.15478	-6.40727	-3.64393	-7.20386	-6.93969	-6.06139	-4.48659	-5.88748
6.24037	267.583		6.24037	0	-10.797	-2.87734	3.77564		6.24096	267.507		6.24096	0	-5.03945	-1.95233	-8.05423	-9.36928	-23.9031	-11.8851	-12.8433	-8.05855	-3.97539	-25.5133	-7.83253	-22.4693	-9.40446	-15.9415	4.90573	-11.5178	-8.54858	-7.46825	-7.35497	-6.02827	-7.27781	-3.78345	-2.61295	-7.01649
6.26043	447.153		6.26043	0	-16.8943	-6.69819	2.63903		6.26102	444.464		6.26102	0	0.4856	-3.52437	-14.1582	-13.8375	-42.9888	-16.6312	-20.3104	-14.2972	-2.56497	-45.1014	-13.0378	-29.4733	-16.7638	-21.5479	-12.0663	-8.61981	-15.1795	-14.3114	-3.33394	-8.92976	-8.29372	-8.99802	-12.1143	-2.64979
6.28049	728.574		6.28049	0	-21.5501	-16.1763	-1.67986		6.28108	725.908		6.28108	0	-8.83003	-11.6334	-28.7504	-21.8884	-63.4665	-34.5012	-34.4648	-38.5327	-3.56257	-73.8859	-27.0048	-52.1917	-18.2771	-41.1773	-11.0854	-27.0816	-18.0244	-11.9351	-10.6645	-21.9377	-11.8253	-11.6845	-8.30791	-11.2113
6.30055	1115.62		6.30055	0	-33.558	-15.5012	12.6164		6.30114	1107.85		6.30114	0	-19.5375	-2.13904	-44.716	-24.1651	-103.889	-43.0185	-38.0675	-35.2873	-3.68743	-103.243	-29.5339	-82.173	-33.1916	-50.9275	-9.5596	-35.0931	-19.031	-21.6826	-8.51901	-16.3661	-15.8591	-10.1212	-1.87691	-4.75373
6.32062	1604.78		6.32062	0	-44.0252	-36.8277	-1.75836		6.3212	1573.18		6.3212	0	-8.34917	-12.3011	-56.5939	-41.1971	-137.167	-58.0372	-56.913	-41.4072	-5.71504	-134.907	-31.9871	-101.038	-36.9367	-63.1965	-21.9594	-34.3222	-18.7444	-26.9394	-11.1802	-14.5657	-8.9042	-3.53591	3.59534	6.26376
6.34068	2104.16		6.34068	0	-53.5078	-38.6759	6.16935		6.34126	2055.82		6.34126	0	-17.2651	-27.4573	-85.7108	-46.0915	-179.728	-62.8385	-59.0751	-64.6121	15.2204	-177.004	-31.6931	-126.689	-48.6831	-69.609	-10.847	-45.5559	-25.283	-14.9703	11.3191	-9.63259	-3.25164	19.5247	23.8553	3.63693
6.36074	2528.3		6.36074	0	-61.8957	-38.7002	-7.56188		6.36132	2452.42		6.36132	0	-21.0089	-17.8808	-92.2328	-48.3984	-206.613	-54.5137	-86.715	-69.0245	35.078	-205.977	-43.3772	-129.774	-35.1849	-67.5537	3.4175	-46.6409	-27.0967	-7.60315	19.6954	9.45929	11.8818	39.5767	37.8612	45.1361
6.3808	2775.09		6.3808	0	-64.0432	-56.3907	-12.9557		6.38138	2670.6		6.38138	0	-12.526	-30.6089	-106.434	-33.8416	-205.665	-51.3502	-78.6831	-55.6065	37.6813	-216.758	-22.0984	-142.04	-32.4364	-66.4883	0.08828	-38.5576	-12.3658	12.2926	57.35	16.9252	18.3983	37.4723	67.1516	71.512
6.40086	2769.94		6.40086	0	-60.7587	-53.7626	-29.088		6.40144	2646.85		6.40144	0	-13.0441	-34.7618	-120.958	-29.2806	-203.734	-66.5524	-76.8874	-53.3912	33.4593	-196.624	-17.4789	-117.855	-18.7578	-73.2185	28.446	-20.9875	-5.52747	22.0728	61.0222	29.8754	36.2612	79.623	89.4493	84.671
6.42092	2500.35		6.42092	0	-43.0631	-32.4579	-18.7823		6.4215	2393.15		6.4215	0	-17.3548	-30.1784	-89.1837	-47.3864	-195.431	-37.9464	-60.9071	-59.3601	32.1725	-181.976	-14.291	-115.826	-10.4427	-46.0727	21.9018	-14.1218	0.35882	21.1671	55.9509	44.9326	33.078	64.2562	80.1906	95.1473
6.44098	2080.58		6.44098	0	-60.3728	-42.5243	-31.7437		6.44156	1970.44		6.44156	0	-23.8118	-30.5606	-88.135	-30.5836	-156.177	-41.6221	-64.4773	-36.0097	30.7803	-152.146	4.88757	-89.9319	-10.4194	-30.4925	30.0598	0.09161	7.44484	20.6715	61.6935	44.9077	44.3976	55.6562	77.587	91.2575
6.46104	1552.64		6.46104	0	-19.1799	-5.11029	-7.39489		6.46162	1473.34		6.46162	0	-12.475	-10.5223	-65.3753	-24.8529	-112.017	-20.3235	-36.6368	-19.2716	29.0345	-103.884	4.50288	-54.4667	7.4931	-13.1319	37.041	-0.54624	22.3769	33.3962	51.3426	46.8323	53.5135	62.4513	65.9061	62.4197
6.4811	1075.53		6.4811	0	-16.574	-13.6416	-15.2901		6.48168	1026.2		6.48168	0	-22.9438	-16.1369	-60.589	-13.1488	-86.6884	-19.1846	-39.4868	-24.2104	9.88893	-77.6123	-4.58101	-40.2775	-8.74978	-18.8801	12.3398	-2.63296	4.17033	23.801	31.507	10.0197	29.1995	45.1747	35.6432	35.5319
6.50116	690.179		6.50116	0	-10.9508	-11.3055	-12.541		6.50174	647.419		6.50174	0	3.20989	-7.10781	-30.1359	-6.03712	-52.3679	-5.16263	-19.5336	-8.06007	22.9728	-44.7634	8.16205	-27.1426	8.18802	-8.74167	15.3562	6.34798	12.0322	14.4276	31.9244	25.9896	20.7186	23.2874	40.7984	36.3294
6.52123	416.083		6.52123	0	-5.65794	-8.01768	-6.74918		6.5218	390.455		6.5218	0	-1.28023	-3.32816	-16.2873	-1.13513	-28.2449	-1.53733	-9.53367	-5.1156	8.7527	-24.2506	11.3676	-8.26596	-3.28997	-2.39224	10.0071	3.38984	3.28797	8.55817	24.567	15.8303	15.4371	21.1421	30.2455	30.3667
6.54129	250.065		6.54129	0	-6.25325	-8.59114	-7.25105		6.54186	231.895		6.54186	0	0.43219	0.8162	-5.69688	-3.1683	-16.8548	-0.9665	-6.18121	-2.77676	6.66294	-16.6154	5.84813	-6.27218	-1.23513	-1.32321	5.2452	3.09616	7.61873	6.46023	13.0658	9.25995	9.55842	11.3889	12.443	13.9119
6.56135	152.792		6.56135	0	-0.70763	-3.40248	-0.39675		6.56192	145.077		6.56192	0	-3.64502	0.20085	-8.54963	-2.62651	-11.8818	-5.48964	-5.5922	-2.98746	0.90213	-13.6993	-3.16787	-7.19681	-0.03929	-2.69921	1.27337	1.89858	2.35949	3.50451	5.23421	5.26472	6.30256	5.98362	4.35249	6.15565
6.58141	108.307		6.58141	0	-4.95642	-1.03501	-5.3723		6.58198	101.982		6.58198	0	-1.92273	-2.65161	-2.77246	-0.06246	-8.16002	-0.8359	-5.85859	-2.09236	-0.01366	-5.90167	-0.14443	-5.50729	-1.92259	-3.32276	1.76562	0.10653	-0.10474	-0.94007	3.5198	1.25783	0.38366	1.82467	1.00439	1.95992
6.60147	85.3079		6.60147	0	-2.99726	-1.20674	-1.85559		6.60204	81.6628		6.60204	0	-1.74092	0.12449	-3.92487	-1.82919	-6.55594	0.28377	-1.5855	-1.03199	0.34686	-5.34788	-0.9559	-5.99721	0.83795	-3.93353	-0.1002	-0.94365	-2.47881	-1.84684	0.47263	3.26514	0.6328	-1.08894	3.12114	3.81407
6.62153	75.6836		6.62153	0	-2.58438	-2.80302	-1.3972		6.6221	73.5117		6.6221	0	0.00734	-0.19406	-4.13589	0.05139	-5.01106	-1.88657	-1.13454	-0.03288	1.43322	-6.48361	-1.17017	-3.74572	1.64116	-1.77157	-0.39112	-0.08941	-0.36042	-1.55777	-1.17387	-1.03176	1.6623	0.44699	2.13767	0.88327
6.64159	72.2816		6.64159	0	-0.83805	0.71541	1.47281		6.64216	69.6701		6.64216	0	0.18362	0.45795	-4.50739	-0.86852	-4.49426	-0.97557	-2.15404	0.14677	2.70905	-5.08698	0.26573	-0.8055	0.01984	-1.28134	-0.36684	-1.48058	0.06283	-0.31461	1.57279	0.86279	0.22419	3.03599	1.79776	0.15157
6.66165	70.0867		6.66165	0	-0.15421	-1.81544	-0.71558		6.66222	69.2602		6.66222	0	-1.43323	0.07023	-3.17795	-0.15745	-4.75356	-1.27681	-2.19576	0.81512	2.66532	-6.67484	-1.79501	-4.30057	-2.38821	-0.72013	2.02824	0.31869	-0.00665	-2.08841	-0.65039	0.79115	1.26977	2.72037	1.65631	1.55118
6.68171	71.4822		6.68171	0	-1.08519	-0.5335	-1.26926		6.68228	68.5065		6.68228	0	-1.75773	1.55681	-2.35984	-0.11477	-3.92111	-2.35465	-4.62536	-2.20094	1.31195	-4.13476	-2.86174	-3.11716	-0.96258	-2.99341	0.94927	0.2903	-1.32266	0.95818	2.56051	1.39177	-0.64974	0.3751	2.76174	1.29265
6.70177	72.093		6.70177	0	-4.22337	-2.69487	-2.73655		6.70234	68.9571		6.70234	0	0.44374	-1.17826	-2.34003	-1.19029	-5.89419	-3.55924	-2.38732	0.04096	0.72979	-4.8631	0.17684	-5.0698	-0.69784	-2.25482	-0.00307	-1.42038	-0.5747	0.15831	1.05487	-1.72788	0.23588	0.75957	-0.87835	1.08454
6.72184	69.3896		6.72184	0	1.64735	0.59347	-0.47613		6.7224	67.9228		6.7224	0	0.01185	-0.14398	-2.8885	-1.87969	-3.19039	-2.13703	0.26014	-0.28192	0.04703	-5.27328	-1.47622	-3.64902	-2.3512	-2.84213	0.92219	0.13584	0.63339	2.6777	1.19246	1.6909	-0.76761	2.32149	2.31058	1.87588
6.7419	69.8103		6.7419	0	-2.42027	-0.54303	0.37254		6.74246	69.9073		6.74246	0	-3.41696	-1.95603	-4.25228	-2.27018	-6.20791	-3.19509	-3.61718	-2.50306	-1.11392	-5.93919	-1.44517	-4.83978	-2.60197	-3.57256	-1.71677	-1.4793	-2.46273	-1.07563	-0.92319	-1.64984	0.18368	-0.82754	0.37165	1.5633
6.76196	72.1359		6.76196	0	-1.87034	-1.59631	-1.03782		6.76252	68.5262		6.76252	0	-0.82887	1.64479	-1.65241	-1.03929	-4.57772	0.70726	-0.30042	0.40737	2.83462	-3.6027	0.39101	-1.89235	-0.44011	-2.23478	2.1076	1.09533	-0.79749	0.87312	2.64904	1.28452	2.04714	1.78427	0.67397	2.74658
6.78202	71.4957		6.78202	0	-0.27114	0.05322	-2.095		6.78258	68.5493		6.78258	0	1.41216	0.39322	1.33968	0.7261	-2.20762	0.94256	0.10686	0.21206	1.26698	-4.77306	1.5816	-2.60174	3.04821	-3.01456	0.49186	0.22552	1.74915	0.21646	2.75831	3.23039	4.14899	3.38705	3.6461	1.66789
6.80208	71.8898		6.80208	0	0.17869	2.48321	1.14199		6.80264	70.0171		6.80264	0	1.06517	4.0763	0.68453	1.0029	-3.72001	1.34955	-2.19979	0.20903	0.93373	-6.07061	2.93114	-1.77475	0.25837	-1.19593	-0.21221	0.90806	1.87135	-2.4524	3.74331	1.95951	3.07604	3.01795	1.03124	3.85397
6.82214	78.8672		6.82214	0	-4.38748	-5.02179	-4.9945		6.8227	72.0006		6.8227	0	3.47983	-0.27795	-2.1971	0.26962	-3.79476	2.512	0.72074	-0.33134	1.81662	-3.65578	1.94458	-1.44098	2.04661	-2.42266	4.76312	1.0094	-1.00559	1.52564	0.18322	0.89515	1.83813	1.27642	1.90862	3.0961
6.8422	79.1143		6.8422	0	-0.71033	-0.92439	1.13516		6.84276	77.0909		6.84276	0	-1.65326	0.40764	-2.4754	-3.11876	-4.14198	-0.27276	-1.91772	-3.59044	1.79007	-4.34706	1.31868	-3.07754	-0.11753	1.71938	-0.65464	-1.21415	0.61232	0.91186	0.55175	-1.48251	-0.90753	2.95593	1.79479	1.8995
6.86226	87.2564		6.86226	0	-1.31245	-3.52129	-1.60484		6.86282	83.0865		6.86282	0	3.49758	0.61881	-3.21004	-0.06478	-5.25872	0.77798	-1.24548	1.48645	2.81716	-4.22198	0.97959	-4.33142	-2.12463	1.17246	2.03203	1.56374	2.566	0.57249	1.90045	0.20076	-0.02396	2.34531	5.08642	0.03478
6.88232	97.0829		6.88232	0	2.0826	1.4991	2.72275		6.88288	100.125		6.88288	0	-0.58389	-4.04934	-2.15634	-2.79476	-12.5431	-4.84024	-7.50801	-3.7686	-2.07137	-9.82676	-3.92249	-8.62657	-3.20976	-6.30933	-2.24539	-0.70803	-1.20961	-5.1327	-2.09793	-2.22343	-2.03225	-3.35249	-3.76464	-3.26518
6.90238	123.482		6.90238	0	-4.70171	-6.16193	-4.93128		6.90294	117.967		6.90294	0	1.36647	-1.6111	-3.55228	-0.40337	-10.7267	-4.17232	-1.88355	-3.66637	0.80288	-7.66971	-0.5906	-6.45345	-0.26253	-5.03764	-1.82875	-0.28753	-0.91136	-1.90132	-1.50346	-0.28774	2.36491	-0.40254	0.05152	2.5943
6.92245	156.338		6.92245	0	-5.47552	-5.10778	-1.77284		6.923	153.727		6.923	0	-1.51549	0.23558	-6.48575	-4.38113	-13.5012	-4.91741	-3.48809	-8.08323	-1.15943	-13.8667	-5.27315	-10.935	-5.22119	-5.70634	-2.70843	-5.05772	-6.26852	-3.11476	-0.30416	-3.80144	-0.63889	-5.19428	-0.75563	-4.2327
6.94251	204.458		6.94251	0	-4.58594	-0.9456	-0.92013		6.94306	198.657		6.94306	0	4.45683	1.25262	-5.05097	-4.08388	-15.3028	-3.51965	-7.37934	-6.18202	0.6865	-14.4449	-5.25546	-9.74017	-5.67073	-6.57194	2.6207	-4.16737	-2.0263	-0.17788	0.33818	-0.27239	-1.79297	2.0091	2.07666	1.81756
6.96257	269.777		6.96257	0	-8.89376	-10.0153	-3.98209		6.96312	261.857		6.96312	0	-3.09695	-0.97801	-10.7011	-8.39325	-24.699	-8.00117	-12.5052	-8.97817	-0.78065	-23.4325	-3.20036	-20.8297	-7.26602	-9.64207	-3.70938	-2.73953	-3.0065	-2.01409	1.21166	-1.71257	-5.98702	-4.08948	-3.39237	5.18388
6.98263	335.692		6.98263	0	-5.83425	-1.92709	-3.6264		6.98318	334.183		6.98318	0	-6.02199	-12.5731	-20.6023	-8.21361	-41.1795	-16.7398	-12.4545	-13.5774	-7.76714	-34.3643	-6.13281	-23.562	-16.513	-16.3474	-7.78007	-13.7396	-15.7033	-5.09478	-1.71421	-5.16921	-1.86773	-2.8085	-7.19633	-5.03578
7.00269	401.27		7.00269	0	-10.2305	-3.7645	0.38932		7.00324	390.308		7.00324	0	4.2785	1.45167	-15.0711	-2.43089	-30.9576	-9.55676	-12.549	-14.9001	5.05342	-30.0711	-1.27226	-16.0998	-6.95726	-12.732	-1.40754	-1.80571	-2.24818	-0.88238	0.09834	2.10718	0.59498	6.27735	2.70433	9.98712
7.02275	450.206		7.02275	0	-9.18279	-8.14449	-1.89122		7.0233	440.048		7.0233	0	-5.98579	-6.47908	-19.5581	-4.38046	-35.1715	-10.1465	-16.4322	-16.1279	7.70044	-36.8811	-8.05829	-23.0406	-9.52937	-10.9481	-2.72046	-6.91983	-7.73761	-0.35287	2.26735	2.29104	-0.96204	6.38563	2.22234	-3.39643
7.04281	473.654		7.04281	0	-11.214	-8.44743	-9.1319		7.04336	454.022		7.04336	0	-4.13568	4.6548	-15.6108	-3.95939	-32.5215	-12.549	-13.1987	-8.73262	5.31122	-35.3217	-5.97302	-24.9155	-6.74728	-13.657	-0.22535	-4.69387	-5.44407	-0.78728	6.69921	3.54425	-0.23452	12.0833	10.043	9.2977
7.06287	460.324		7.06287	0	-20.1991	-10.7995	-8.90943		7.06342	433.013		7.06342	0	1.37134	-2.69843	-10.0637	-0.21091	-26.6093	-2.4656	-2.34253	-8.66251	8.43453	-26.8527	0.21175	-16.1778	-2.01903	-7.52409	2.89615	2.22288	-3.64333	5.74328	9.56163	9.04172	6.81473	13.9029	22.1124	18.6128
7.08293	408.25		7.08293	0	-13.3276	-8.49879	-6.36879		7.08348	386.682		7.08348	0	-0.02937	0.96123	-16.5994	2.35685	-24.1148	-1.59997	-9.20258	-3.38959	8.59519	-25.4013	0.40316	-17.4086	1.93518	-6.31697	4.02837	-4.93303	1.41991	8.5304	8.89772	6.95755	9.80973	8.98005	19.4757	18.2696
7.10299	337.667		7.10299	0	-6.15576	-4.68765	-2.54429		7.10354	321.841		7.10354	0	0.04539	-3.26985	-12.9221	-3.08901	-21.6911	-6.50975	-11.5766	-6.34049	0.72515	-21.9163	-0.94254	-15.2739	-0.35608	-6.34052	6.17591	-3.43926	1.64515	3.07632	9.5307	8.55159	6.46435	10.4554	13.7047	10.9117
7.12306	260.896		7.12306	0	-4.1849	-0.16926	-2.83471		7.1236	250.083		7.1236	0	-0.70267	-2.07004	-10.0473	-5.49708	-21.4655	-7.8627	-5.74246	-7.9533	4.1474	-18.9282	-2.41394	-10.815	-3.79358	-8.50573	5.40315	3.1065	-1.03153	1.67969	6.6043	7.15169	2.15092	9.68439	9.11275	11.0509
7.14312	194.181		7.14312	0	-2.56311	-5.80736	-6.56818		7.14366	183.021		7.14366	0	0.92606	0.10007	-8.29812	-2.88466	-11.1629	-1.24378	-6.9073	-4.95748	4.45642	-11.8615	2.18834	-3.88696	0.34066	-1.63867	4.27408	2.67455	2.63449	4.80167	7.40397	5.69342	9.30798	7.71144	5.36567	9.47201
7.16318	137.483		7.16318	0	-2.70475	-1.61166	-1.91428		7.16372	131.293		7.16372	0	-1.63346	-2.32994	-4.73177	-2.28831	-9.80772	-0.21726	-3.03605	-2.45192	3.8613	-7.39599	3.65907	-3.41026	4.14171	-4.61275	1.31425	2.69508	3.57725	5.3218	6.71722	3.95307	5.01252	7.83284	5.87449	5.91498
7.18324	100.717		7.18324	0	-4.70352	-0.50934	-5.78191		7.18378	96.9112		7.18378	0	-3.10473	-0.29667	-6.02143	-1.90874	-9.58788	-0.37676	-1.7347	-0.61945	1.31551	-8.67499	-0.57876	-2.77453	-2.09797	-0.86861	-1.6276	-1.33871	-1.50292	-1.63499	4.38226	2.06229	-1.14089	4.96145	2.66239	1.07389
7.2033	74.7973		7.2033	0	-1.02942	1.27246	0.22631		7.20384	74.5012		7.20384	0	-2.83663	-3.23105	-6.94296	-4.27809	-8.82071	-1.08779	-4.98478	-1.81953	-1.83535	-7.30253	-1.85638	-4.19904	-4.78921	-2.22062	-0.79205	-2.838	-4.37704	-2.15423	-2.47081	-1.25562	0.10327	-2.43268	0.57636	-0.95898
7.22336	60.4479		7.22336	0	1.24502	0.10058	1.38092		7.2239	58.7553		7.2239	0	0.34005	1.89003	-0.56443	-0.66306	-2.90357	-0.89909	-2.61724	0.87212	-0.41449	-3.84056	-0.65238	-0.89576	1.13685	-0.46375	2.58578	0.52983	0.02285	1.51576	3.67235	1.80142	1.56393	3.00479	3.42361	2.16357
7.24342	55.8684		7.24342	0	-4.18629	-2.31284	-3.30908		7.24396	53.3642		7.24396	0	0.12533	-0.45568	-1.43932	-2.74943	-4.7257	-0.80899	-3.20568	-3.0857	-0.19672	-3.82681	1.46615	-2.24149	-2.25096	-0.58617	0.90914	-0.76714	-1.96892	-0.97636	1.2402	-0.94597	0.40403	1.78061	0.82525	0.91209
7.26348	50.6209		7.26348	0	0.33532	-0.7809	0.63978		7.26402	49.8684		7.26402	0	-0.43191	-2.02446	-1.32256	-1.14928	-4.82944	-0.95473	-0.05396	0.60393	1.06074	-4.3266	-1.34458	-3.35769	-1.63794	-0.67954	-1.09216	-0.46424	0.30766	-0.47215	0.43978	-0.70998	0.50381	2.33135	0.20543	1.04552
7.28354	50.5765		7.28354	0	-0.73861	-0.66413	-3.00533		7.28408	49.4588		7.28408	0	-2.22167	-1.14077	-2.77348	0.44536	-3.6447	-1.75173	-3.08581	-1.57141	-1.16211	-6.6157	-2.23532	-2.75532	-2.83227	-2.9942	-0.00648	-0.5313	-0.87203	0.24311	-0.31212	1.75618	0.03694	0.16907	0.43749	0.35808
7.3036	49.7773		7.3036	0	-1.59599	-0.24464	-1.98544		7.30414	45.0807		7.30414	0	1.53126	3.21573	3.33695	2.68976	-0.91838	2.66939	2.81938	2.72021	2.89142	-0.34606	2.25111	0.18532	2.56419	3.61085	2.01576	3.4114	3.44007	4.3152	2.83775	2.63402	2.66183	4.96463	2.10929	1.50282
7.32367	49.66		7.32367	0	-0.19988	-2.51172	-0.93754		7.3242	46.2894		7.3242	0	-0.58278	1.29584	-0.3954	2.02004	-0.87549	0.44797	-0.23899	1.92115	0.46399	-0.8742	1.49754	-2.39612	0.48874	1.71028	0.74136	2.05126	0.72904	1.5343	3.60118	1.42532	3.09649	3.844	1.47299	2.56144
7.34373	48.731		7.34373	0	0.77237	-1.0419	-0.45189		7.34426	50.8833		7.34426	0	-2.39556	-3.38418	-3.77049	-4.08229	-7.40195	-3.75817	-4.18772	-2.6945	-2.65159	-6.78701	-3.63817	-6.4538	-4.1706	-3.98632	-4.98649	-3.433	-4.67152	-3.51782	-4.56728	-2.53412	-2.43932	-2.11255	-3.40654	-1.88088
7.36379	49.7198		7.36379	0	-1.27657	-0.17293	-1.04208		7.36432	50.475		7.36432	0	-1.57752	-1.96298	-4.23874	-2.83362	-5.71204	-2.96201	-2.25223	-2.73832	-1.13456	-4.59129	-1.171	-5.72362	-2.20146	-2.56178	-2.09144	-2.5691	-2.36761	-1.51555	-2.77566	-1.49128	-2.22826	-3.33035	-1.50251	-0.4835
7.38385	49.2106		7.38385	0	-0.66565	0.05905	-0.65096		7.38438	46.2449		7.38438	0	3.29934	1.62054	2.02312	1.67659	-2.0167	1.35425	0.83783	0.67298	1.63973	-2.61562	2.69065	-1.90083	1.85527	1.8845	1.68039	2.26891	2.03688	0.7055	3.84258	1.55722	2.17758	2.32774	3.54237	2.49177
7.40391	49.6902		7.40391	0	-0.28819	-0.5371	-0.82065		7.40444	49.1569		7.40444	0	0.79699	-1.35597	-2.72818	-1.47205	-3.20574	-2.35491	0.4854	-2.60511	0.09811	-3.35915	-1.19654	-1.8099	-0.57989	-1.9572	0.29539	-0.5994	-3.14043	-1.90071	0.29552	-1.0923	-0.62517	-0.64933	0.96091	0.68129
7.42397	49.821		7.42397	0	-1.17533	-2.24868	-0.83332		7.4245	49.6974		7.4245	0	-1.76994	-1.44403	-3.63234	-1.9266	-4.69655	-1.94719	-2.63614	0.25794	-0.89846	-4.3675	-2.23546	-3.55156	-0.55648	-2.77875	-0.79031	-1.6176	-1.91742	-0.49752	-1.86505	-2.04844	0.17052	-1.80562	0.59667	-0.5622
7.44403	49.8937		7.44403	0	-0.34765	-0.8735	-0.24149		7.44456	49.7615		7.44456	0	-0.34657	-0.84007	-2.71269	-2.48667	-5.53112	-3.71374	-1.81846	-1.55096	-2.66016	-4.22017	-1.51948	-4.0234	-2.48511	-2.97265	-2.55588	-1.8774	-1.76274	-1.39172	-0.68126	-1.01869	-1.88776	-1.07904	-0.28282	-0.29934
7.46409	49.9951		7.46409	0	-1.61097	-0.92927	-0.32806		7.46462	48.0579		7.46462	0	2.39162	-0.81742	-2.6558	-0.50274	-2.42712	-0.15693	-0.67398	0.08798	-0.02135	-2.89796	1.18114	-1.54732	-0.99821	-1.72306	0.4345	0.52111	-0.88674	-1.9592	-0.97239	2.17273	1.94093	0.11974	2.2132	-0.75021
7.48415	48.8182		7.48415	0	-1.04378	-0.22172	0.34677		7.48468	49.3957		7.48468	0	-2.50341	-2.39227	-2.79597	-1.77608	-3.82033	-1.79652	-1.34506	-2.34873	-0.90012	-3.74689	-2.04217	-3.1858	-3.7017	-3.57976	-1.90641	-1.98947	-3.27024	-0.72038	-1.45526	-0.39037	-2.55167	-0.69044	0.45737	-1.12097
7.50421	49.7483		7.50421	0	-2.20662	-2.41041	-2.28085		7.50474	46.0728		7.50474	0	2.54453	1.23233	0.93323	0.74965	-0.76184	0.08286	-0.12997	0.60801	2.81324	-1.82727	-0.14962	-1.68613	0.90036	-0.34333	2.07051	0.74755	1.1415	1.37966	2.06546	1.72939	2.15207	1.22544	2.3949	2.07383
7.52428	48.178		7.52428	0	-1.15999	-1.95158	-1.04999		7.5248	47.0445		7.5248	0	-0.60445	0.2175	1.8866	-1.38481	-3.2992	1.45982	-1.51032	1.10137	-0.31253	-1.84251	-1.1213	-3.79495	-0.37479	-1.50964	0.20467	-0.35491	-0.63525	-0.09415	-0.85865	0.69197	-0.0686	-1.2187	2.01678	1.62699
7.54434	47.5521		7.54434	0	0.75904	-0.98816	-1.90005		7.54486	45.103		7.54486	0	2.04798	0.49955	-1.17663	1.35345	-3.3365	0.88007	-0.9885	0.80245	3.45518	-1.32446	0.88522	-1.31693	0.48287	-0.0222	0.51	-0.17139	1.13127	2.06553	1.74249	0.97057	1.28147	1.97536	1.80026	1.1723
7.5644	46.7968		7.5644	0	0.61403	-1.13997	-0.21436		7.56492	46.6982		7.56492	0	-0.36622	-1.07411	-2.1087	0.29673	-3.82033	-0.71503	-3.31491	-1.22363	-0.39902	-5.27893	-1.51188	-3.3842	-0.63565	-2.09306	-2.37214	-1.00761	-2.16291	-2.01879	0.51951	0.55712	-0.20442	-1.31192	0.16119	-0.02669
7.58446	48.5708		7.58446	0	-2.29315	-1.78831	-2.25466		7.58498	44.9078		7.58498	0	2.04926	0.99652	-0.63915	2.0871	-1.09726	-1.27333	-2.01914	0.50231	1.82603	-1.97882	1.03708	-1.40053	1.76189	0.54058	0.63973	-0.06394	1.73984	-2.12807	0.90588	0.13797	1.23494	2.08274	1.79814	1.36841
7.60452	47.6986		7.60452	0	-1.31886	-1.44305	-1.55941		7.60504	46.6983		7.60504	0	-2.22066	-0.88014	-2.30122	-2.24608	-4.6501	-2.02945	-3.03542	-2.17145	-2.31238	-3.23845	-2.37886	-2.76194	-1.02551	-1.61749	-2.15418	0.25169	-1.6183	-0.20642	-1.32269	-0.51496	0.10261	1.30325	-0.27721	-1.45449
7.62458	47.5385		7.62458	0	-0.08518	-1.04895	-2.43257		7.6251	45.2311		7.6251	0	-3.01707	0.19905	-0.42774	-2.24422	-2.76859	-0.15297	-3.13839	-0.81205	-0.45368	-2.5359	-0.39159	-1.40244	-1.09749	0.26047	-1.05799	0.22047	-1.15251	-0.90129	0.2112	0.23016	-1.01586	-0.61413	-0.19852	-0.40639
7.64464	46.3173		7.64464	0	-1.97158	-0.55859	-0.66517		7.64516	44.8867		7.64516	0	-0.53845	-0.27541	-1.21659	-1.27396	-2.7931	-0.77814	-0.19142	-1.11379	-0.67427	-4.18902	-0.50222	-0.88657	-0.92667	0.259	-0.73501	-0.65101	-0.85281	0.14218	-0.82626	-0.01605	-1.10992	0.3895	1.51051	1.91687
7.6647	44.8341		7.6647	0	0.74589	-0.55322	1.52644		7.66522	45.0363		7.66522	0	-1.74459	-1.09322	-1.25912	-1.81207	-2.87717	-1.78969	-2.36284	-0.55255	-0.17274	-2.44887	-1.34538	0.20888	-0.20918	-2.16087	-0.01201	-1.01809	-1.78585	0.36365	0.40709	-0.40631	-0.7117	-0.96905	-0.68626	0.86414
7.68476	45.096		7.68476	0	-2.13078	-1.32671	-1.34804		7.68528	43.5487		7.68528	0	-1.07599	0.15739	-1.73913	0.60203	-2.99181	0.81844	-0.63861	-1.28387	0.85878	-3.34103	-0.55125	-0.23461	1.27838	-0.06786	1.10469	0.81775	-0.12372	1.65434	0.97231	3.94704	1.49938	1.66201	1.30784	2.37736
7.70482	46.3467		7.70482	0	-2.20482	-1.5243	-1.77195		7.70534	45.4259		7.70534	0	-1.59517	-1.69831	-1.90569	-1.16776	-2.88987	-1.92076	-0.79512	-1.93331	-0.34534	-2.79468	-1.30154	-4.79325	-0.68574	-2.637	-1.23056	-3.25282	-1.49997	0.51963	-1.38766	-1.18995	-0.55414	-0.91918	-1.18613	-1.36783
7.72489	44.5582		7.72489	0	-0.43149	-1.19935	0.10495		7.7254	44.5206		7.7254	0	-0.96972	-0.23263	-1.66339	-1.70579	-4.17097	-2.54534	-1.35242	-2.98812	-0.17812	-4.39711	0.03721	0.70286	-1.34103	-3.11546	-1.83065	-0.04589	1.45231	-1.21716	-0.13176	-1.81602	-0.10849	-1.1127	-0.54393	0.35019
7.74495	45.1546		7.74495	0	-2.68338	-2.21961	-0.949		7.74546	43.0967		7.74546	0	0.32444	0.84641	-0.64565	0.5367	-3.65488	-2.1558	-1.95031	-0.91802	1.80966	-4.12123	-0.79279	-2.78588	-0.00367	-0.56727	2.01447	0.20513	0.98092	1.82281	0.78866	0.87684	0.28638	-0.8097	0.85874	1.29116
7.76501	45.0087		7.76501	0	-1.87021	-1.13799	-0.83257		7.76552	44.0879		7.76552	0	-1.39926	-1.78265	-1.87192	-1.40275	-2.61601	-1.78948	-1.37138	-0.16424	-0.26773	-3.64641	-0.93869	-2.46865	-2.8372	-2.35839	-1.5723	1.03807	-1.99056	1.02813	0.06146	-1.33945	-0.57374	-1.20725	-0.7717	-1.04483
7.78507	45.0964		7.78507	0	-0.41743	-2.20504	-0.71342		7.78558	42.9877		7.78558	0	-0.3426	-0.33767	-1.26385	-1.42273	-3.0978	-2.41299	-2.03492	-1.3474	0.70452	-2.41707	0.07474	-0.4887	-0.89179	-2.12308	-0.8648	-0.0545	-0.5207	0.77433	0.96348	0.1328	-0.52507	0.90418	-0.3544	2.23712
7.80513	44.8786		7.80513	0	-1.1725	-0.92027	-0.70257		7.80564	44.3486		7.80564	0	-0.71169	-2.0004	-3.15939	-2.37388	-2.85441	-1.87769	-1.28801	-2.64395	-0.61479	-4.31039	-3.82183	-2.57917	0.28337	-1.06243	-0.69875	-2.28416	-0.00871	-0.89212	-0.96969	0.41243	-1.73286	-1.7974	-1.20845	-0.13828
7.82519	45.3004		7.82519	0	-1.01286	-1.15164	-1.96566		7.8257	42.9025		7.8257	0	-0.17126	1.19141	-1.05041	-0.02289	-2.48722	-1.22877	-0.14305	0.11638	-0.82142	-2.52521	0.48502	-1.0468	-0.45969	-0.37306	-0.95418	1.48544	1.45879	-0.01394	0.47725	0.28345	-0.19938	0.81353	0.54599	0.82247
7.84525	45.6773		7.84525	0	-1.24516	0.0374	-0.527		7.84576	43.8085		7.84576	0	-0.17159	-1.43866	-0.0743	0.27733	-3.19069	-1.25143	-1.45767	-1.716	0.55428	-2.49493	-1.02778	-1.26641	0.36825	-1.92769	-0.20228	0.14523	1.61953	-0.15564	2.29071	0.55861	1.30533	-0.13633	-0.3604	0.77514
7.86531	45.5755		7.86531	0	-1.23074	0.0368	0.23879		7.86582	46.3966		7.86582	0	-1.94044	-2.71207	-3.21846	-2.28883	-3.05012	-2.69745	-2.08845	-1.43907	0.29428	-4.16908	-1.01526	-3.98356	-4.0623	-2.3104	-2.0051	-0.98779	-2.88482	-2.78734	-2.29198	-3.21058	-2.51062	-0.26316	-0.65903	-1.17511
7.88537	48.4549		7.88537	0	-1.00017	-0.57461	-0.61833		7.88588	45.4038		7.88588	0	2.41571	0.522	1.26026	1.37578	-1.99011	1.80762	0.36686	0.7386	1.32896	-0.26496	0.97444	0.16272	1.69924	0.00128	1.60549	2.02434	1.72266	1.52474	2.67051	1.93885	1.39684	2.35635	2.90868	2.91961
7.90543	51.7979		7.90543	0	-1.10253	-0.51054	1.47056		7.90594	50.8825		7.90594	0	0.27878	-0.84029	-2.10101	-1.94832	-2.89884	-0.63293	-2.33715	-0.49642	0.6106	-4.04441	-1.01503	-2.89155	-0.70136	-0.63419	-1.36488	1.23681	-1.86021	-0.56937	0.01636	-1.65848	-0.55413	-0.37515	0.88492	-1.68225
7.9255	55.8256		7.9255	0	-0.04641	-1.20334	-0.75676		7.926	56.4709		7.926	0	-1.92468	-3.0883	-0.61079	-1.20164	-5.90568	-1.86862	-3.96783	-1.08722	-2.99862	-4.57488	-2.44235	-4.70443	-3.06014	-3.23881	-0.23432	-3.874	-2.91954	-2.83854	-0.55237	-0.63957	-1.2786	-1.10623	-2.91985	-1.02747
7.94556	63.4719		7.94556	0	-1.58894	-2.96843	-2.45505		7.94606	61.9051		7.94606	0	-0.30857	-0.18219	-3.60716	-2.4771	-5.41147	-0.42896	-1.63745	-2.83767	-1.241	-4.86492	-1.89504	-6.25507	-1.21023	-1.0622	-0.54216	-1.83859	-1.53727	-3.94877	-1.88656	-2.00495	-4.01759	-0.95791	-0.32084	-1.27252
7.96562	70.4355		7.96562	0	-4.31078	-5.25125	-2.437		7.96612	67.9879		7.96612	0	-1.73499	-1.50222	-2.20509	-1.7943	-3.64723	-3.25827	-2.68719	-1.9626	-0.14821	-5.95487	-2.16978	-3.00615	-2.87166	-1.54514	-1.2372	-4.35952	-0.78112	-1.23141	-1.04208	-0.7151	-0.54826	0.36643	-1.00981	0.77929
7.98568	75.1173		7.98568	0	-0.43436	-1.10988	-0.1815		7.98618	75.0865		7.98618	0	-0.85655	-1.46716	0.34168	-0.91963	-5.86741	-2.9444	-3.01055	-4.3003	-0.66117	-6.54989	-4.76061	-5.17019	-4.35605	-3.71402	-4.71457	-1.88093	-1.71813	-0.8392	0.08061	-1.42555	-2.49721	-4.05128	-2.51731	-0.27242
8.00574	79.9574		8.00574	0	-1.48321	-0.8448	1.39866		8.00624	79.3558		8.00624	0	-2.62475	-0.32712	-2.15284	-2.12982	-4.38818	-2.38676	-4.03207	-2.81809	-0.88619	-7.4618	-1.09789	-4.46239	-2.57756	-0.89146	0.57072	-1.24252	-3.19889	-0.74151	-0.2883	0.05916	-1.11406	-0.34182	1.79491	-0.21293
8.0258	81.8333		8.0258	0	-0.8155	1.08298	0.57036		8.0263	79.074		8.0263	0	2.48619	0.45031	-1.89229	2.65551	-2.48937	-0.76905	0.93866	1.83701	4.50261	-3.22614	1.19941	1.26825	0.19716	-1.32318	2.94677	0.19047	1.19772	2.92544	2.7989	0.47226	2.34567	4.3141	1.72486	0.904
8.04586	81.5564		8.04586	0	-1.03254	1.34512	1.2608		8.04636	82.3959		8.04636	0	-1.61142	-3.00091	-4.01633	-1.26981	-7.68549	-6.46101	-3.48021	-2.41137	-1.79809	-8.46143	-1.77576	-8.03925	-3.64507	-1.38024	-1.4439	-1.39472	-1.27285	-2.0781	-2.5412	-1.97463	-1.13048	-1.36045	0.03356	-0.37424
8.06592	78.8966		8.06592	0	-1.84452	1.66352	0.03891		8.06642	75.6461		8.06642	0	1.25745	0.08518	-0.73171	-0.38078	-4.65161	-0.59473	-0.30073	-1.56401	1.9521	-3.43295	0.83467	-1.91168	1.47878	-0.68445	1.42291	1.81566	0.53207	2.44409	2.98263	2.67501	3.05565	2.29093	2.64423	2.86036
8.08598	74.4189		8.08598	0	-2.13335	-0.77787	-0.82638		8.08648	70.0792		8.08648	0	-1.06689	-1.33053	-1.1527	1.07089	-3.55801	0.44711	1.32997	-0.08998	-0.04482	-4.58193	1.48206	-1.06438	1.30185	1.85547	2.64844	1.91008	1.50369	0.52098	3.72709	4.08499	2.31329	5.65995	1.74116	2.31954
8.10604	66.2778		8.10604	0	1.0093	1.36486	2.7979		8.10654	65.7668		8.10654	0	-3.50254	0.93455	-1.95144	-1.44771	-3.22832	-0.77829	-3.77834	-2.60639	0.41959	-3.81893	-0.94553	-1.85756	1.19215	-1.11854	1.13692	1.90165	-0.76026	-0.64777	1.09113	-0.68164	1.89205	2.98256	4.71047	3.13253
8.12611	62.4683		8.12611	0	-0.81741	-0.51622	1.20556		8.1266	61.3869		8.1266	0	-1.04157	-3.54323	-5.29176	-2.67028	-5.06107	-3.61715	-4.88329	-3.59041	-3.11156	-6.40846	-3.99926	-4.49296	-1.55976	-2.96569	-0.76575	-1.42835	-3.02209	0.36889	0.07834	-1.15847	-1.04619	-0.59349	0.57158	1.83958
8.14617	56.3913		8.14617	0	-0.05925	-1.4599	-1.01234		8.14666	52.9748		8.14666	0	-2.2878	2.43361	-1.0924	-0.87291	-2.89005	1.21806	-1.6978	1.76266	1.38735	-2.54484	0.81532	-0.2859	0.43618	0.84106	0.68783	1.77195	2.4501	-0.41224	3.1205	2.9875	6.57853	3.22497	0.44379	4.51221
8.16623	51.3909		8.16623	0	-0.46382	0.18881	1.06549		8.16672	51.6605		8.16672	0	-2.82794	-0.99341	-2.68702	-2.94191	-6.39717	-0.9369	-0.96431	-0.88689	0.87596	-5.7784	-2.31315	-4.46365	-0.24387	-1.28246	-1.66283	-1.97385	-1.70167	-1.74027	-0.84757	0.45138	0.85892	1.0667	1.62622	0.26839
8.18629	47.6253		8.18629	0	0.75933	0.56174	-0.4087		8.18678	47.3007		8.18678	0	-1.61548	-0.29731	-2.56153	-3.47302	-3.65844	-0.80047	-1.33639	-0.96443	-0.56802	-4.1168	-0.07723	-0.44687	-0.86958	-0.5767	1.36625	-1.54468	-0.26076	-0.0663	1.12203	1.6829	0.46399	-0.09013	-0.661	0.29534
8.20635	47.2477		8.20635	0	-2.16094	-1.67955	-1.18225		8.20684	43.2468		8.20684	0	2.09348	0.63159	-0.19676	0.49467	-1.7573	0.02146	-0.87447	0.84932	0.90123	-0.72329	2.698	-0.01837	1.42858	0.1475	2.93325	1.09744	3.61861	3.15776	3.26921	2.0613	2.7864	1.47991	4.33871	2.41443
8.22641	45.7502		8.22641	0	-2.30539	-2.52277	-0.05358		8.2269	43.1603		8.2269	0	0.10993	-1.56619	-1.09465	-0.66858	-3.4242	0.38807	-0.55133	-1.39076	0.9214	-0.95507	0.09721	-1.51935	-2.10505	0.32053	-0.62305	2.79086	1.78928	1.06028	2.43421	-1.52759	0.22235	2.424	1.43296	1.53498
8.24647	43.0462		8.24647	0	-1.24299	-1.13474	1.29241		8.24696	42.6203		8.24696	0	-2.60577	-1.28497	0.51495	-1.29233	-3.1902	-0.90353	-0.44157	-0.33385	1.85322	-1.56259	0.13869	-0.55066	-0.65483	-0.52331	-0.69379	0.85581	-0.84977	0.57412	1.11208	-0.15617	-0.44315	0.9194	1.53212	-1.00322
8.26653	45.4445		8.26653	0	-3.39524	-1.79283	-2.09495		8.26702	41.4138		8.26702	0	-0.53654	0.02939	-0.99474	-0.23695	-1.94594	-0.1282	-2.24621	-0.50607	0.03758	-1.0574	1.15021	-0.13781	-0.09848	0.12106	0.9489	0.95418	1.79343	0.97252	2.31578	0.98478	2.73562	-0.22526	2.32052	0.84315
8.28659	42.0435		8.28659	0	0.29602	-0.13275	0.25825		8.28708	41.9323		8.28708	0	-1.55109	-1.84689	-2.71077	-2.0696	-3.91279	-1.50849	-1.45274	-1.08922	-0.50329	-3.5937	-1.92566	-4.47509	-1.54908	-1.2407	1.0412	0.32756	-1.31656	0.65057	-0.37106	0.20361	0.70483	-0.876	-0.94836	-0.95472
8.30665	40.9387		8.30665	0	1.22681	0.91393	-0.96934		8.30714	40.7022		8.30714	0	-1.29107	1.36598	0.74357	-1.27058	-3.00418	0.41122	-0.97546	-0.54835	2.72646	-1.76835	0.21469	-2.47253	0.98174	-1.02677	-0.06248	-1.15689	-0.08641	-0.17183	2.32726	0.4273	0.51108	2.37596	1.77819	0.80476
8.32672	42.9303		8.32672	0	-2.77074	-1.03349	-1.89813		8.3272	42.4714		8.3272	0	-0.86136	-2.81713	-3.46366	-3.08255	-3.00479	-2.1985	-3.64801	-3.3516	-2.91119	-3.70804	-1.8579	-3.21189	-2.13133	-1.71492	-1.70105	-2.60038	-2.63908	-2.55263	0.25231	0.25498	-0.644	-1.06346	-1.90574	-1.73505
8.34678	41.5194		8.34678	0	-1.19961	-0.26638	-0.5166		8.34726	41.09		8.34726	0	-0.94585	-0.76753	-1.31184	-1.80909	-3.8569	-1.09715	-3.34216	-0.69936	-1.07359	-3.43201	-2.38369	-3.50425	-0.94502	-1.45786	0.2478	-2.45676	-0.6702	-0.86578	0.01032	-2.38893	-0.46819	1.417	-0.34866	-0.68348
8.36684	40.8659		8.36684	0	-1.78045	-0.32989	0.0633		8.36732	41.3278		8.36732	0	-1.91653	-1.04847	-1.40074	-2.60683	-3.60755	-2.49858	-0.74066	-1.86334	-0.07188	-4.28474	-1.34282	-3.76355	-1.03126	-2.19295	-1.01564	-0.17545	-3.17242	-2.89408	0.2104	-0.15457	-0.77169	0.29977	0.11854	-1.02929
8.3869	41.0401		8.3869	0	-1.06838	-0.28546	-0.49472		8.38738	40.0548		8.38738	0	1.01624	1.53922	-1.11106	-1.57107	-3.42322	0.0028	-0.34955	-0.39665	-0.64725	-2.24763	0.12523	-1.93265	-2.0123	-1.35238	-1.59647	-2.11629	-0.70235	-0.46374	-0.33467	-0.47867	-2.34711	0.12231	-1.20659	0.52616
8.40696	41.2731		8.40696	0	-0.03757	-1.51223	-1.09668		8.40744	41.5217		8.40744	0	-0.75252	-1.99662	-4.7164	-2.39136	-4.30711	-2.64932	-2.56928	-3.62969	-3.33207	-3.82112	-2.1002	-5.43762	-3.47919	-1.71661	-2.99837	-2.82347	-1.21108	-1.36283	-3.07293	-1.28942	-0.70308	-2.37754	-1.39673	-0.65251
8.42702	41.0544		8.42702	0	-1.78018	-0.72202	-2.32474		8.4275	40.6803		8.4275	0	-2.32566	-0.74582	-4.6025	-2.21817	-4.69761	-3.23025	-1.59889	-0.65576	-0.74952	-3.00036	-2.38573	-1.29215	-1.57594	-3.2968	-2.11312	-3.08932	-2.52534	-0.65256	-0.47788	-1.65092	-2.05215	-0.08596	0.21519	0.07708
8.44708	41.1702		8.44708	0	-1.08243	-1.93534	-1.0827		8.44756	37.0353		8.44756	0	2.16025	1.13205	0.15494	-0.06011	0.27985	1.49234	0.26096	2.66604	3.04671	0.72863	1.5627	0.87249	2.22077	1.64555	1.94654	1.77141	1.99025	0.91816	2.79514	2.01585	0.21223	3.25176	2.34045	2.71122
8.46714	40.4001		8.46714	0	-0.09463	-1.26896	-0.84365		8.46762	39.5793		8.46762	0	-1.13819	-0.01112	0.02728	-1.13862	-2.48197	-1.63338	-2.19702	-4.48777	0.04434	-5.61945	-0.43951	-1.54277	-1.36353	-2.62817	-1.18661	-2.31476	-1.25062	-1.25478	-1.06469	-0.96569	0.9991	-0.03957	-0.55604	-0.51221
8.4872	39.5429		8.4872	0	-0.54458	-1.40571	-0.91648		8.48768	40.0984		8.48768	0	-0.49314	-0.44395	-1.36855	-2.62739	-2.62778	-2.58362	-2.99567	-1.00012	-0.36325	-2.37606	-1.41369	-2.14768	-2.77137	-2.82293	-1.48752	-0.01012	-1.37744	1.21806	-1.67254	-0.91609	-0.9222	-0.97628	-1.88938	0.99022
8.50726	40.0074		8.50726	0	-0.71833	-0.91903	-2.10436		8.50774	39.6449		8.50774	0	-2.38974	-0.55074	-3.33157	-0.38534	-4.86257	-3.31506	-2.06897	-1.66674	-2.25712	-3.68699	-1.41527	-3.45355	-2.55619	-2.1316	-1.29598	-2.31483	-1.22918	-1.40776	-1.2405	-1.42501	0.53892	0.46644	-2.68907	-0.64314
8.52733	40.575		8.52733	0	-0.99484	-2.55522	-1.40228		8.5278	39.279		8.5278	0	-0.79482	0.09515	-2.11036	-1.33404	-4.22604	-1.52715	-1.18699	-1.2795	-0.19781	-3.2792	-2.06805	-1.8219	-0.62977	-2.47926	-2.19519	-1.75333	0.4431	-2.17713	-0.89522	-1.36549	-0.12507	-0.61827	-0.56313	-0.54195
8.54739	40.4731		8.54739	0	-1.37393	-1.78016	-1.40407		8.54786	38.9124		8.54786	0	-2.54115	1.12985	-0.43928	0.82105	-3.16587	-0.53565	-2.88519	-2.46379	0.03858	-3.10356	0.31407	-2.14157	-1.88869	-1.33425	-1.74134	-1.62535	-0.27839	-1.67976	0.08434	-0.47361	-0.10851	0.89113	-0.50438	-1.45185
8.56745	39.5429		8.56745	0	-0.5603	-1.52322	1.43029		8.56792	38.3926		8.56792	0	0.39327	-1.02264	-1.07417	-1.02905	-1.83202	0.71671	-0.60171	-1.10396	0.77671	-2.77482	-0.05474	-1.27894	-0.45889	-2.09017	0.65449	-1.82256	0.08865	-1.20368	0.53766	0.59272	-1.10118	-1.77602	-0.05113	1.00355
8.58751	39.9935		8.58751	0	-1.41577	-1.7259	-1.13075		8.58798	39.5371		8.58798	0	-2.28191	-0.76632	-2.34724	-2.73414	-3.6347	-1.80687	-2.21934	-0.86961	-1.43313	-2.89837	-1.30752	-3.94631	-2.40522	-1.78603	-3.10775	-0.77362	0.25063	-2.93781	-0.629	-1.42668	-0.47109	-1.31602	-0.53468	-1.10969
8.60757	39.3829		8.60757	0	-1.09699	-0.6319	-1.80454		8.60804	37.8113		8.60804	0	-0.44807	-1.32488	-0.66425	1.14669	-2.82674	0.50106	-0.66552	-0.91017	-0.98955	-1.59881	-0.68697	-1.44816	0.18763	-2.3304	0.25434	0.06206	0.29959	0.31664	-2.27873	0.71485	0.72894	2.41003	0.22368	0.42023
8.62763	40.2842		8.62763	0	-2.41912	-1.5329	-1.08241		8.6281	38.846		8.6281	0	-0.4914	-0.13987	-1.65601	-2.77575	-1.93523	-2.4948	-2.90477	-0.1786	-0.06716	-3.50346	-1.0499	-3.27641	-2.92788	-2.6949	-0.80248	-1.64637	-2.54243	0.11183	1.02823	1.0583	-1.24764	-0.49318	-0.92224	-1.64867
8.64769	38.8594		8.64769	0	-2.14296	-1.42468	-0.49888		8.64816	37.3588		8.64816	0	-0.66408	-0.37675	-0.78904	-1.48218	-2.52529	0.30692	-0.83691	-1.10408	0.17895	-1.69888	0.63238	-2.28269	-0.63875	0.30581	-1.03849	-0.24539	0.57829	-1.08684	1.2658	1.25483	-0.39599	1.21429	0.54372	1.04813
8.66775	38.4088		8.66775	0	-0.16573	-0.18494	-2.05534		8.66822	37.5522		8.66822	0	-0.85747	0.11945	-2.03016	-1.26642	-2.27518	-0.57599	-1.20237	-1.74978	-0.90591	-5.46337	0.63394	-2.58341	-1.39591	-0.90384	1.56023	-0.54786	-1.11833	-0.80022	0.69889	-1.71701	-0.87429	0.07544	1.29612	-1.01593
8.68781	37.4926		8.68781	0	-0.90647	0.77604	-0.23904		8.68828	37.6826		8.68828	0	-0.83707	-1.41174	-2.90927	-2.15101	-3.1104	-2.08556	-1.97803	-1.53565	-1.79608	-2.93698	-0.29828	-4.34457	-2.00333	-1.44504	1.01542	-1.93793	0.23166	-0.88672	1.20467	0.3184	-0.43495	-0.69247	-0.48665	-1.27698
8.70787	37.0131		8.70787	0	-1.37234	0.97758	0.43268		8.70834	37.3605		8.70834	0	-2.36915	-2.01634	-3.72042	-1.41929	-3.95886	-1.87102	-1.24718	-3.45377	-1.01699	-2.63551	-2.33835	-3.57166	-1.2905	-1.33906	-0.18913	-1.22486	0.27119	-2.59538	-1.76122	-2.26913	-1.82166	-1.33728	-0.20692	1.13663
8.72794	36.2428		8.72794	0	0.64818	-0.05112	0.33219		8.7284	36.7114		8.7284	0	-1.65516	-1.06561	-2.90007	-1.52437	-2.88019	-2.06236	-2.03924	-0.56437	-0.56457	-4.45004	-1.77601	-2.68627	-1.57367	-1.42515	-1.72183	-0.94473	-1.58351	0.25915	0.59723	0.1082	0.20781	-0.60032	-0.4167	0.62151
8.748	37.1732		8.748	0	-0.26729	-0.85029	0.33153		8.74846	35.8495		8.74846	0	-1.05218	-1.13034	-1.52527	-0.01611	-2.30333	-2.36413	-2.3603	-2.1368	-0.44109	-1.74033	0.16947	-1.4815	0.54535	0.02053	0.64518	-0.32185	-1.22274	0.16016	-0.03009	0.05124	0.52172	0.19571	0.203	0.25096
8.76806	37.391		8.76806	0	-1.53117	-0.95103	-1.68689		8.76852	37.1641		8.76852	0	-2.19428	-1.21645	-1.15005	-3.03276	-4.05255	-2.73048	-1.69613	-3.27882	-3.05991	-2.60814	-1.18844	-3.48252	-0.7475	-1.63999	-1.75998	-2.04904	-0.83831	-1.48196	-3.12154	-0.45386	-1.86672	0.77136	0.86914	0.3211
8.78812	38.1475		8.78812	0	-1.67761	-0.96148	-0.87861		8.78858	35.9133		8.78858	0	-0.44737	0.98258	-0.26298	1.42831	-3.04379	-1.93232	-1.43461	0.19075	0.95139	-1.50745	1.25431	-0.42996	1.002	0.15135	1.03979	-0.36392	0.93473	-0.38402	1.81234	0.84092	1.42196	2.59378	-0.47766	0.31602
8.80818	37.4057		8.80818	0	-1.51789	-1.22953	0.9698		8.80864	36.4098		8.80864	0	-0.83633	0.80935	-0.33185	-0.08071	-2.76644	0.54485	-0.23194	1.07298	-0.97961	-1.11185	-1.90778	-3.58645	0.28877	0.54134	0.76134	0.61583	-0.38978	-0.48746	1.0297	0.97868	-1.35346	-0.82596	-1.2603	1.05126
8.82824	37.7977		8.82824	0	-0.456	1.34856	-1.297		8.8287	38.4591		8.8287	0	-0.12593	-2.16673	-1.78212	-3.48783	-4.01301	-3.55168	-2.1953	-2.91523	-2.81175	-4.15956	-1.96334	-2.37474	0.29861	-2.50262	-0.50278	-3.82168	-1.28461	0.12758	-0.44777	-1.53025	-1.29868	-0.36987	-2.45016	-0.97541
8.8483	38.0454		8.8483	0	0.96735	-0.17121	-0.14224		8.84876	38.5879		8.84876	0	-0.18976	-2.81268	-2.38141	-3.22862	-3.06916	-1.22378	-2.79721	-2.95779	-1.26683	-4.11723	-2.91561	-3.16854	-2.34475	-2.0043	-0.60973	-1.75734	0.19842	-0.7217	-0.57757	-1.309	-1.58115	-0.05909	-1.10465	0.06163
8.86836	38.5983		8.86836	0	-0.60353	-0.15469	0.47086		8.86882	37.7041		8.86882	0	-0.3843	0.72173	-0.87751	-0.87965	-3.05257	0.00459	-1.09619	-0.76024	0.6161	-2.15062	-1.44678	-0.50436	-0.70217	-1.18546	-0.05309	0.12497	0.66867	1.49405	0.43727	-2.28467	-0.01823	0.73681	0.1969	-0.44281
8.88842	37.58		8.88842	0	-0.76195	0.52699	0.57404		8.88888	36.8838		8.88888	0	-0.92225	-1.02245	0.07101	-1.11521	-3.02863	-0.23101	-1.09313	-0.349	0.78479	-2.62669	0.80396	0.42321	-0.12029	-1.3597	-0.58528	-0.31384	-0.0359	0.47998	-0.14575	1.37988	0.40777	0.19446	1.39124	0.42586
8.90848	37.8418		8.90848	0	-0.90698	-0.81667	-0.91269		8.90894	36.8616		8.90894	0	0.32904	-2.01316	-1.85294	-0.16634	-2.59086	-2.34192	-1.30759	-1.27475	-0.97555	-3.62524	-1.7962	-0.79933	-0.66172	-1.98619	-1.04318	-1.61632	-1.95169	-0.9174	0.75435	1.09551	-0.42441	0.50221	0.64467	-0.34431
8.92855	36.8383		8.92855	0	-0.74664	-0.10543	-0.58791		8.929	35.6988		8.929	0	-0.79345	0.78769	1.94053	-0.27464	-2.24206	-1.4808	0.41448	-0.52105	2.5136	-1.99333	0.92704	-2.27425	-0.62637	-1.75303	-1.55994	-0.69225	-1.00613	0.81335	2.15699	-0.14786	1.08857	-0.15913	0.66194	0.37648
8.94861	35.6754		8.94861	0	-0.71596	-0.58138	-0.81299		8.94906	34.6822		8.94906	0	-0.05723	-0.41564	-0.1868	-0.0769	-1.87831	-0.35652	-1.04253	-0.2801	-1.40409	-0.99822	-0.37531	-1.34418	-0.06499	-0.04463	0.41617	0.47592	-0.6658	-0.48477	0.32469	1.41556	-0.94	-0.74715	-0.7859	0.53654
8.96867	34.9636		8.96867	0	-0.64457	-0.39593	-1.10472		8.96912	34.2523		8.96912	0	-1.52464	-0.54608	-2.17341	-2.21105	-3.01489	-2.62005	-1.15026	-1.33653	-1.06116	-3.54454	-0.18381	-1.34315	-0.89225	-1.1066	-0.06976	-1.28679	-1.30253	-0.94998	0.8426	0.18278	-0.66381	-0.00936	0.349	1.07393
8.98873	34.1202		8.98873	0	-0.8757	-0.43072	-1.51603		8.98918	32.3756		8.98918	0	-0.72586	0.5333	-2.79879	0.0319	-2.28128	-0.26922	-0.86517	0.15239	0.7281	-1.89969	-0.30088	-0.90377	-0.22907	-2.6244	0.97796	-1.01779	-0.90597	-0.7553	0.98741	1.14065	0.57786	0.48297	1.45438	1.13043
9.00879	32.5061		9.00879	0	-1.2534	-0.73239	-0.049		9.00924	30.9739		9.00924	0	0.48185	-0.13392	0.20677	0.70082	-2.91975	0.18426	-1.07664	-0.01845	1.28246	-1.90133	-0.06951	-0.4033	1.21571	0.37725	1.26717	0.64472	-0.28866	0.05707	0.8552	1.5141	0.64297	0.19191	-0.57726	1.05659
9.02885	31.9687		9.02885	0	-1.02062	-1.55604	-1.16491		9.0293	30.8893		9.0293	0	-0.25313	-0.30806	-1.54792	-1.56322	-1.64614	-0.07588	-0.75551	1.31568	-0.61168	-1.62545	-0.44006	-1.5414	-1.71283	-0.74897	-1.09132	-1.11652	0.29622	-0.84127	-0.81396	-0.28288	0.50804	0.67191	-0.27222	-0.00189
9.04891	29.9329		9.04891	0	0.43371	1.06448	1.53509		9.04936	30.262		9.04936	0	-0.87628	-1.21088	-1.02742	-0.16002	-3.18601	-1.43104	-0.51535	-0.92216	-0.6135	-1.76388	-0.54959	-1.4075	0.28018	-1.61355	-0.09313	-0.641	0.4015	-1.13095	-1.32704	-1.05571	-0.46387	-1.02989	-0.13047	-0.64821
9.06897	31.1979		9.06897	0	-1.17939	-1.54544	-1.87013		9.06942	28.9255		9.06942	0	-0.85496	1.72038	-0.73882	-0.33217	-0.98535	-0.59009	1.20826	-0.57668	1.20143	-1.68211	1.06865	-0.43573	0.12103	-0.10409	0.32697	0.06532	-0.87556	0.72969	0.62395	0.06199	1.88045	1.25156	1.69127	0.79844
9.08903	30.3983		9.08903	0	-0.77202	-1.30171	0.59719		9.08948	28.1269		9.08948	0	1.02191	0.79494	-0.60334	0.83295	-2.03483	-0.52423	-0.38052	0.24351	0.43506	-0.98842	0.93534	0.29856	0.07414	0.75937	0.23128	-0.46023	0.07495	0.85124	1.5088	0.88263	1.25458	0.86312	0.7501	1.72895
9.10909	29.8605		9.10909	0	-2.25415	-1.14482	-1.50695		9.10954	27.0277		9.10954	0	1.51738	1.41997	0.92357	1.50103	-0.25098	0.74751	2.11674	0.63184	-0.31212	-0.10247	0.88593	-0.01835	1.69358	2.16127	2.59574	0.98631	1.34883	0.44376	2.03849	2.20037	0.60113	2.46793	2.42188	1.52925
9.12916	28.1449		9.12916	0	0.15896	0.16113	-0.6473		9.1296	28.9902		9.1296	0	-1.91127	-0.47779	-2.36482	-1.15096	-2.05994	-0.28838	-0.87822	-0.21051	-1.60348	-2.2982	-1.50999	-1.91602	0.03474	-1.59577	-0.8281	-1.38883	-2.83451	-0.51427	-0.12139	-1.29326	0.28222	-1.23099	-2.15891	-0.78489
9.14922	27.6647		9.14922	0	-0.4211	-0.11812	1.05784		9.14966	27.3498		9.14966	0	-0.85255	0.21434	-0.12548	1.22199	-1.00133	-0.86751	-0.76491	-1.37049	1.08193	-2.65517	-0.15136	-1.17706	-0.55748	-1.8797	0.87742	0.18631	-0.17129	1.4974	0.51153	-0.528	0.71736	0.51928	-0.27695	1.9549
9.16928	27.4178		9.16928	0	0.10094	0.6399	-0.06828		9.16972	26.9201		9.16972	0	0.051	-0.06716	-0.91468	-0.30873	-2.8816	0.63976	-0.33522	0.78266	0.42401	-1.56732	-1.2603	-0.25381	-0.62634	-1.01752	-0.8741	0.78969	1.78262	-0.12551	-1.77628	-1.01719	-0.36472	2.04777	-0.04519	0.14275
9.18934	26.11		9.18934	0	-0.94357	0.93814	1.41698		9.18978	26.8333		9.18978	0	-0.83266	-0.002	-1.74761	0.9415	-1.93489	0.7695	-1.86168	-1.24162	-0.68327	-2.22328	0.49515	-0.01701	-0.45277	-1.75243	0.8923	-1.23016	-1.3534	-0.89067	0.9847	-1.10571	0.35775	-0.45872	-0.37714	0.07692
9.2094	26.2265		9.2094	0	1.04655	0.25044	0.16413		9.20984	25.6462		9.20984	0	0.91512	0.79724	-0.83862	-0.13399	-0.31113	-0.15501	0.83113	-0.93778	0.19862	-0.88847	-0.00811	0.20469	0.66927	0.19145	0.00694	-0.43362	0.44344	0.73309	1.31574	1.08806	-0.12057	1.43148	0.94159	-0.01525
9.22946	25.9647		9.22946	0	-0.08705	0.61548	0.32275		9.2299	28.5796		9.2299	0	-2.25525	-3.21386	-4.28503	-3.73546	-4.34147	-3.41171	-4.44678	-3.54807	-3.29994	-4.79895	-3.65673	-4.12294	-2.39452	-4.25547	-3.64625	-2.67222	-1.29208	-3.64125	-2.77851	-3.66131	-4.23696	-4.35885	-2.45317	-1.88963
9.24952	26.2411		9.24952	0	-0.48021	-0.42148	0.10537		9.24996	24.9124		9.24996	0	-0.46368	1.14318	0.34421	-0.71465	-1.12057	0.27725	0.12388	-0.74254	0.54023	-1.53617	0.98575	0.48804	0.79591	-1.04227	0.78444	-0.24276	0.87252	1.07404	1.43504	1.07783	0.67914	-0.40587	0.92734	0.32605
9.26958	25.7173		9.26958	0	-1.01592	-0.40962	-1.1275		9.27002	24.9127		9.27002	0	0.16135	-0.08564	-1.3027	0.4272	-2.178	-2.05047	-1.25299	-0.78596	0.75684	-1.64172	-0.63998	-1.97965	-0.13652	0.4709	-0.37214	-0.00418	-1.39255	-0.8916	-0.34065	0.11507	0.65702	0.47285	0.59746	1.04867
9.28964	24.2344		9.28964	0	0.77077	0.34193	0.10449		9.29008	24.4817		9.29008	0	-0.44271	-0.40898	-0.16597	-0.41302	-1.31999	0.27679	-1.05863	-0.31187	-0.09527	-0.82849	-0.62077	-1.39787	-0.52921	-1.34674	0.05901	-1.44092	0.30172	1.22071	-0.19406	-0.72288	-2.24269	0.42033	-1.67866	0.27339
9.3097	23.7982		9.3097	0	-0.30352	-0.80129	0.74698		9.31014	24.137		9.31014	0	0.67798	-0.10728	-1.06173	-0.65014	-0.34266	-1.46857	-0.6924	-0.78563	-0.61845	-1.37659	-0.79613	-1.58958	-0.57462	-1.82361	-0.81781	-0.59688	-0.98711	-0.53082	-0.3758	-0.04997	0.11791	-0.28986	0.49216	0.17666
9.32977	23.2605		9.32977	0	0.85857	0.11647	0.96045		9.3302	23.0152		9.3302	0	1.28269	0.26022	-0.90219	1.05331	0.11843	0.64442	-0.81809	0.27145	0.32983	-0.89192	-0.4762	-0.5109	-0.14637	-1.82613	-0.02322	1.35034	0.67894	0.24162	1.27387	0.30614	-0.92984	-0.50906	0.11751	1.25587
9.34983	24.0746		9.34983	0	-1.36496	-1.09217	-0.28172		9.35026	22.9714		9.35026	0	-0.89415	0.56264	-0.45216	-0.19606	-1.2996	-0.36774	-0.4947	0.5738	-1.01799	-0.40175	-0.34571	-1.7758	-0.77444	-0.5499	-0.21934	-1.25527	-1.32403	0.11074	-0.34932	-0.54704	-0.07476	0.39231	-0.69724	0.59784
9.36989	23.2309		9.36989	0	-0.79703	-0.39566	0.23712		9.37032	21.6558		9.37032	0	1.36994	0.80065	-1.63882	1.11984	-0.4535	0.51698	-0.72771	-0.52333	0.66779	-0.40407	-0.02707	0.22642	0.54071	-0.53162	0.63822	0.75558	0.25272	0.46549	0.28669	0.5716	0.84632	1.09226	1.58664	0.92222
9.38995	21.6752		9.38995	0	0.13489	-0.21543	0.99555		9.39038	22.7133		9.39038	0	-0.24839	-2.11032	-1.11364	-2.17856	-2.14362	-1.57481	-0.77439	-1.30079	-1.15151	-2.22593	-2.73166	-2.26851	-1.14522	-1.52428	-1.57553	-1.90925	0.39292	-1.40013	0.82898	-0.61711	-1.52585	-1.54774	-0.98971	-1.30003
9.41001	22.6938		9.41001	0	-1.23262	-1.24817	-1.0411		9.41044	21.2679		9.41044	0	0.9817	0.58503	-0.92995	0.64616	-0.30484	0.12906	-0.59795	0.10157	-0.07478	-1.63128	1.33608	0.18541	-0.7836	-1.41939	-0.26114	1.27341	1.33758	0.70045	0.30198	0.12815	1.05908	0.38127	0.03796	0.51868
9.43007	20.9197		9.43007	0	-0.21464	-0.39589	0.21638		9.4305	20.3396		9.4305	0	0.37902	-0.74943	-0.96431	0.00124	-0.73195	-0.73107	-0.44401	-0.00414	0.48401	-0.89419	0.33553	-0.81697	0.07967	-1.16138	1.80156	0.09541	-0.63059	1.061	-0.23858	1.82225	0.62875	1.19955	0.90049	0.87496
9.45013	20.1352		9.45013	0	0.32288	0.1401	-0.00288		9.45056	18.6574		9.45056	0	0.35839	0.73881	1.61657	1.76974	0.0714	1.12364	0.65747	0.60102	1.68893	1.15017	1.60604	-1.06556	-0.10216	1.14792	2.02238	1.36479	2.09717	1.41131	1.35547	0.85737	0.77669	0.06847	0.91015	2.07448
9.47019	19.9168		9.47019	0	-0.65101	-0.13855	-0.13873		9.47062	19.9739		9.47062	0	-0.69949	-1.63376	-1.58218	0.10835	-2.15595	-0.45158	-1.23976	-0.80181	-1.08498	-2.18612	-0.94581	-0.98788	-0.11834	-0.16863	-0.40673	-0.23379	0.03933	-0.40772	-0.00503	-0.32783	-0.21062	-0.03907	0.12137	-0.0765
9.49025	19.4803		9.49025	0	-0.77988	-0.85836	-0.91236		9.49068	18.5934		9.49068	0	-0.67741	0.35017	-0.4582	0.41157	-0.1336	-0.06229	-0.9347	0.1479	0.27292	-0.67875	-0.69228	-0.37983	0.37352	0.77941	-0.05151	0.58203	-0.29996	1.06	1.26697	0.26482	-0.18867	-0.74689	0.40143	0.31222
9.51031	19.2915		9.51031	0	-2.19033	-0.62529	-0.42843		9.51074	17.6866		9.51074	0	0.42351	0.58894	-0.55664	-0.29783	-1.30557	1.16776	0.85402	0.4947	1.11574	0.18588	0.99477	-0.39525	0.54341	0.84304	1.20441	0.22958	-0.48203	-0.28223	0.13421	1.54366	0.91569	1.89671	1.79241	0.62569
9.53038	18.2883		9.53038	0	0.65894	-0.1633	-0.10435		9.5308	17.364		9.5308	0	0.2718	0.35119	0.66448	-0.34154	0.98397	-0.36278	0.38074	-0.64768	-0.10564	-0.63844	-0.19968	-0.15881	0.3025	0.30078	0.28351	0.18291	0.38495	1.74367	0.06308	0.13788	2.00535	1.16412	-0.08594	-0.10483
9.55044	18.0416		9.55044	0	0.17903	-0.18033	-0.38871		9.55086	18.4195		9.55086	0	-0.41702	-0.03622	-0.64762	-0.21173	-2.15579	-1.26741	-1.77165	-0.97066	-0.44415	-1.63076	0.30522	-2.26531	-0.8399	-0.77635	-1.64441	-1.19851	-1.17213	-0.86228	-0.86085	-0.04253	-1.59217	-1.73745	-1.05339	-0.54648
9.5705	17.4889		9.5705	0	0.10674	-0.53412	0.5475		9.57092	16.1559		9.57092	0	0.59588	1.83948	0.35397	0.90972	0.009	0.30669	0.98662	1.63769	2.42903	0.46288	1.4852	0.36312	0.9253	0.51429	1.16444	1.15178	1.50569	0.96462	1.33639	0.03348	0.2111	0.89969	0.24181	0.57538
9.59056	17.5617		9.59056	0	-1.3754	-0.25604	-0.88301		9.59098	16.6944		9.59098	0	0.48881	-0.57404	-1.21092	-0.70613	-1.64328	-0.40417	-0.64888	-0.53809	0.52085	-0.30948	0.14481	-1.87009	0.06157	0.06225	-0.26844	0.07044	-0.60092	0.64445	0.22894	0.30428	0.61503	0.00955	0.4075	0.87109
9.61062	17.8377		9.61062	0	-2.43605	-1.18988	-0.81953		9.61104	17.428		9.61104	0	-0.80547	-0.96271	-0.68284	-1.20279	-1.39588	-0.49133	-1.21036	-0.92699	-1.5175	-2.1696	-0.82715	-1.35964	-1.69078	-1.73077	-1.08916	-0.70639	-1.20341	-0.87528	-1.68904	-2.31075	-2.09059	-0.98763	-1.60272	-2.28012
9.63068	17.0238		9.63068	0	-0.6486	-0.33284	-1.02429		9.6311	15.9403		9.6311	0	0.1001	-1.13447	-0.99148	-1.26642	-1.58183	-0.44728	-0.47544	0.15146	-0.03007	-0.85169	0.37884	-1.43793	0.72907	-0.65386	1.24919	-0.23953	0.41519	-0.41393	0.89537	-0.36361	-0.33987	0.36805	-0.7312	-0.61722
9.65074	16.1367		9.65074	0	-0.74948	-0.73337	0.55667		9.65116	15.509		9.65116	0	-0.20152	-0.50926	0.29537	0.86675	-0.32382	-0.49013	-0.6679	-0.10662	0.33567	-0.97309	0.22496	-0.66349	0.8134	-1.06584	0.72065	-0.02549	-0.17718	0.56326	-0.51447	-0.45744	-0.08398	0.22784	-0.03539	0.09939
9.6708	16.0059		9.6708	0	-0.74957	-1.14409	0.0233		9.67122	15.4866		9.67122	0	0.38139	0.00873	-1.26501	-0.48971	-1.85573	-0.46773	0.32236	-0.21347	-0.14108	-1.46123	0.24731	-0.81254	-0.31297	-0.65429	-0.435	-1.13237	0.04063	-0.96474	-0.7998	-0.28198	-0.34617	1.08542	-0.10207	0.07875
9.69086	15.555		9.69086	0	-1.12691	-0.6634	0.09039		9.69128	13.8481		9.69128	0	0.48908	0.78531	0.75841	1.32136	0.61292	0.09339	0.7134	0.84345	1.41138	-0.3743	0.84563	0.07499	0.74011	0.2059	0.76727	0.50657	1.48309	0.32419	1.01362	0.76611	0.34997	1.86697	0.98693	0.5519
9.71092	14.8722		9.71092	0	-0.83574	-0.09742	0.02046		9.71134	15.3577		9.71134	0	-1.04195	-1.22004	-1.24297	-0.6193	-3.27899	-1.15768	-2.0868	-1.14019	-0.46832	-1.75626	-1.55259	-0.70519	-1.1379	-1.56321	-0.98227	-1.98041	-1.26823	-0.94504	-0.86854	-1.88122	-0.89693	0.24726	-0.8522	-0.05691
9.73099	14.2179		9.73099	0	-1.0539	-0.26209	-0.40261		9.7314	14.28		9.7314	0	-0.93457	0.07313	-1.40564	-0.4036	-0.69242	-1.24361	-1.52531	-1.22573	0.30527	-2.10277	-0.58327	-1.06486	-0.58055	-0.65851	-0.95169	0.55211	-1.36578	0.00164	0.05664	0.15898	-0.6738	-0.85092	-0.06138	-0.73652
9.75105	14.305		9.75105	0	-1.21363	-0.75934	-0.23902		9.75146	12.7047		9.75146	0	0.36064	0.39854	0.29803	0.09443	-1.09331	0.13788	0.41572	-0.49056	0.20655	-0.76154	-0.28655	0.81089	-0.58738	-0.20744	-0.09607	0.54228	-0.33445	0.87821	0.49157	0.42187	0.3322	1.29571	-0.04849	1.40949
9.77111	13.0407		9.77111	0	-0.51581	-0.13784	-0.49488		9.77152	11.6049		9.77152	0	0.16675	1.67072	0.1788	0.91421	-0.26762	0.56959	-0.03318	-0.33859	0.17596	-0.34143	1.31165	-0.44924	0.18714	1.06528	0.48001	0.90362	1.24344	1.36652	-0.05128	0.44952	1.56324	1.16477	0.74307	1.51859
9.79117	11.4267		9.79117	0	0.73479	0.10076	0.13027		9.79158	10.8279		9.79158	0	0.66323	0.74517	0.46385	1.58321	-0.27319	0.4632	0.0771	1.17083	0.75816	-0.3297	0.7667	-0.08002	-0.53153	0.718	0.64633	0.87693	0.91018	0.92055	1.79862	0.04522	1.59544	1.56809	0.88133	0.36227
9.81123	10.9179		9.81123	0	0.12465	0.80002	0.69804		9.81164	10.9357		9.81164	0	-0.39317	-0.20319	-0.47787	0.65674	-0.37729	-0.18339	0.1198	-0.59571	0.84569	-1.22329	0.70219	-0.5737	0.29279	-0.2331	-0.7049	-0.22958	-0.61327	-0.08266	-0.63313	0.39671	0.91801	0.86673	0.35531	0.49647
9.83129	10.5401		9.83129	0	-0.67461	0.5483	0.6035		9.8317	10.0945		9.8317	0	0.25419	0.33637	0.27775	-0.3118	-0.34719	0.16227	-0.45856	-0.44378	0.8388	-1.16894	0.09143	-0.52636	-0.01496	-0.1702	0.57252	0.24242	0.51114	-0.79175	-0.09875	0.8223	-0.2131	0.30152	0.31633	0.56888
9.85135	9.81307		9.85135	0	0.54657	-0.08489	0.75516		9.85176	9.27488		9.85176	0	-0.09044	0.33705	-0.12163	0.39992	0.07099	-0.24633	0.85574	-0.29196	0.37659	-0.13687	0.45588	-0.1357	-0.73414	0.15209	0.89043	0.69281	0.59026	1.25065	0.61171	0.00116	0.3875	0.5497	0.85039	0.57508
9.87141	9.71094		9.87141	0	-0.32503	-0.52455	-0.17607		9.87182	8.58475		9.87182	0	0.03916	-0.3737	0.67538	0.57293	0.4371	0.22829	-0.21784	0.89359	0.28388	-0.25428	0.30079	0.70449	0.34596	0.19356	1.5588	-0.00671	-0.52706	0.65241	1.34549	0.95368	0.35476	0.16274	0.63755	1.26369
9.89147	8.59183		9.89147	0	-0.54245	0.59492	0.58874		9.89188	8.60671		9.89188	0	-0.2416	-0.50343	-0.09525	-0.61266	0.1802	-0.80635	-0.28283	-0.0978	0.06593	-0.42487	-0.67472	-0.62621	-0.10947	-0.77973	0.44608	-0.83238	0.32233	0.19373	0.38047	-0.44647	0.37681	-0.29871	-0.44079	-0.05371
9.91153	8.44643		9.91153	0	0.35842	-0.16674	-0.40241		9.91194	8.51976		9.91194	0	0.38446	-0.71819	-0.67115	-0.67653	-0.3486	0.14253	-0.79807	-0.65705	0.45749	-1.48559	0.04072	0.55481	-0.10919	-0.26035	-0.23052	-0.70207	-0.15701	0.17156	-0.43118	-0.33759	0.26639	0.33774	-0.3537	-0.97934
9.9316	8.17037		9.9316	0	-0.12125	0.12409	0.40505		9.932	8.21872		9.932	0	-1.06095	-0.35248	-0.17769	-0.69863	-1.15296	-0.52614	-0.8627	-0.65758	-0.43708	-0.88695	0.01667	-0.81734	-0.84871	-0.97552	-0.7365	-0.44412	-0.79254	-0.33546	-0.17395	-0.53977	-0.04629	0.15513	0.32076	0.90345
9.95166	8.2282		9.95166	0	-0.54209	-0.16788	-0.46448		9.95206	7.44164		9.95206	0	0.10428	-0.30817	-0.57666	-0.11548	0.15831	0.48798	-0.45131	0.4857	0.38356	-0.15271	0.18693	0.25994	0.10188	0.57993	0.7168	0.15903	0.44233	0.17968	-0.22927	0.80608	0.44591	0.20702	0.52654	1.90168
9.97172	8.0393		9.97172	0	-0.13513	-0.62279	-0.15768		9.97212	7.20446		9.97212	0	0.4276	0.07985	0.19505	0.14334	-0.3245	0.33733	0.000980002	0.18437	0.94634	-0.80758	0.09904	-0.23218	0.0787	0.14685	0.58309	0.37444	0.37412	0.4603	0.31461	0.36512	-0.01762	0.29025	0.45515	0.1812
9.99178	7.5597		9.99178	0	0.03937	-0.15732	0.21858		9.99218	7.31266		9.99218	0	0.83699	-0.26538	-0.53335	-0.24516	0.25195	0.09983	0.06484	-0.20389	-0.20482	-0.23613	0.83604	-0.12583	0.36079	-1.1073	0.36586	0.04911	0.11355	0.3305	0.40336	-0.02752	0.70678	1.01737	0.12705	1.26077
10.0118	0		10.0118	0	0	0	0		10.0122	0		10.0122	0	0	0	0	0	0	0	0	0	0	0	0	0	0	0	0	0	0	0	0	0	0	0	0	0

## Sheet: Fig 4
Table S4: Data for Figure 4
On-Site						Hypobaric Chamber
	Mg	Al	Si	S			Mg	Al	Si	S
Energy (keV)	1.21	1.49	1.73	2.31		Energy (keV)	1.21	1.49	1.73	2.31
Pressure (mbar)	Norm. CPS	Norm. CPS	Norm. CPS	Norm. CPS		Pressure (mbar)	Norm. CPS	Norm. CPS	Norm. CPS	Norm. CPS
959	1	1	1	1		952	1	1	1	1
947	1.02439	1.04529	0.99166	1.01719		850.667	0.90976	1.13793	1.10907	1.02978
936	1.09446	1.13894	1.02794	1.05248		750	0.78888	1.35333	1.28046	1.13637
926	1.01201	1.06033	0.9594	0.98142		639	0.87977	1.61231	1.46417	1.20484
916	1.02382	1.1223	1.06349	1.05505		529	0.89259	2.00888	1.81586	1.39675
904	0.99909	0.9953	0.95256	0.9198
894	1.09844	1.17884	1.09212	1.04128
882	1.0137	1.20851	1.09572	1.0594
869	0.99038	1.21293	1.09672	1.05845
861.5	1.09965	1.29697	1.19547	1.11383
850.5	1.05885	1.08307	1.02291	1.0032
839	1.1006	1.27092	1.21436	1.08965
833	1.06884	1.24222	1.10984	1.03487
823	1.07164	1.34718	1.21527	1.12577
800	0.93166	1.38397	1.21862	1.13214
792.5	1.08263	1.44832	1.32002	1.18281
783	1.08612	1.45424	1.28479	1.18881
774.5	0.96358	1.5176	1.331	1.16932
767	1.03339	1.53579	1.36337	1.19228
758	1.06687	1.57355	1.4038	1.23836
748	0.98897	1.61009	1.40804	1.26991
738	1.02844	1.65014	1.44436	1.24733
728	0.99357	1.70353	1.49238	1.29775
722	1.08392	1.71702	1.52471	1.29249
712.5	1.06143	1.73594	1.51778	1.30521

## Sheet: Fig 5
Table S5: Data for Figure 5
On-Site					Hypobaric Chamber
	Fe	Cu	As			Fe	Cu	As
Energy (keV)	6.4	8.03	10.51		Energy (keV)	6.4	8.03	10.51
Pressure (mbar)	Norm.CPS	Norm.CPS	Norm.CPS		Pressure (mbar)	Norm.CPS	Norm.CPS	Norm.CPS
959	1	1	1		952	1	1	1
947	1.00308	0.99198	1.02409		850.667	0.97777	1.00871	0.9378
936	0.98293	1.00354	0.95429		750	0.982	0.97579	0.86854
926	0.98731	0.96475	1.01331		639	0.98586	0.9999	0.88479
916.5	0.98897	1.00525	0.95894		529	0.96221	0.97858	0.93128
904	0.96182	0.94463	0.86008
894.5	0.98649	0.98005	0.95678
882	0.98056	0.97327	0.88354
869	0.98011	0.95876	0.85958
861.5	1.01762	1.00668	0.93282
851	0.96717	0.9891	0.99877
839	0.99693	1.00489	0.95211
833	0.99762	0.98834	0.88583
823	1.00524	0.97962	0.87807
800	0.99805	1.01868	0.9191
792.5	0.99921	0.98235	0.94808
783	1.00456	0.97909	0.93767
774.5	1.00093	0.97033	0.96241
767.5	0.99479	0.9976	0.9179
758	1.00982	0.99415	0.99105
748	1.0061	0.99353	0.914
738.5	0.99348	0.99468	0.92823
728	1.01384	0.96762	0.9599
722	1.00966	0.98701	0.9394
712.5	1.00717	0.97831	0.9855

## Sheet: Fig 6
Table S6: Data for Figure 6
	Air (1000 mbar)	Air (550 mbar)	Helium (1000 mbar)	Mylar	Polypropylene
Energy (keV)	Transmission	Transmission	Transmission	Transmission	Transmission
0.01	0	0	0	0	0
0.03998	0	0	1.6467e-35	0	8.0152e-27
0.06996	0	1.4201e-28	3.646e-11	2.7153e-19	1.7956e-08
0.09994	7.4123e-26	1.5083e-14	2.4278e-05	4.6099e-10	0.00029652
0.12992	6.5689e-15	1.5835e-08	0.00575	5.1393e-06	0.0103
0.1599	1.0585e-09	1.1577e-05	0.06257	0.00043423	0.05887
0.18988	1.2276e-06	0.00056103	0.18286	0.00553	0.15239
0.21986	9.5782e-05	0.00616	0.33048	0.032	0.28538
0.24984	0.00046897	0.01476	0.4667	0.08739	0.41137
0.27982	0.00325	0.04278	0.58972	0.16985	0.54457
0.3098	0.01152	0.08586	0.6798	1.3893e-07	1.9142e-06
0.33978	0.03004	0.14545	0.74803	2.6428e-06	2.2007e-05
0.36976	0.06381	0.22013	0.79955	2.4128e-05	0.00013802
0.39974	0.10971	0.29657	0.83901	0.00014921	0.00063093
0.42972	8.3591e-12	8.0758e-07	0.86968	0.00063459	0.00211
0.4597	3.3426e-10	6.1411e-06	0.89331	0.00197	0.00545
0.48968	6.5118e-09	3.1444e-05	0.91169	0.00488	0.01163
0.51966	7.3444e-08	0.0001192	0.9262	0.01026	0.02165
0.54964	2.472e-09	1.8458e-05	0.9377	0.00047956	0.03594
0.57962	2.7354e-08	6.924e-05	0.94718	0.00123	0.05459
0.6096	2.1633e-07	0.00021593	0.95477	0.0027	0.07732
0.63958	1.2401e-06	0.00056415	0.96107	0.00525	0.10361
0.66956	5.6049e-06	0.00129	0.96658	0.00939	0.13276
0.69954	1.9576e-05	0.00257	0.97073	0.01493	0.16268
0.72952	5.8142e-05	0.00468	0.97428	0.02286	0.19682
0.7595	0.00014999	0.00789	0.97733	0.03334	0.23307
0.78948	0.00034881	0.01254	0.97994	0.04641	0.2697
0.81946	0.00074	0.01897	0.98219	0.06211	0.30615
0.84944	0.00143	0.02721	0.98411	0.08007	0.34199
0.87942	0.00251	0.03712	0.98574	0.09972	0.37706
0.9094	0.00412	0.0488	0.98715	0.12095	0.41093
0.93938	0.00645	0.06241	0.98838	0.14391	0.44346
0.96936	0.00968	0.07801	0.98946	0.16851	0.47457
0.99934	0.01391	0.09524	0.99041	0.19403	0.5041
1.0293	0.01922	0.1138	0.99127	0.22001	0.53198
1.0593	0.02577	0.13371	0.99203	0.24649	0.55857
1.0893	0.03363	0.15479	0.99271	0.27323	0.58376
1.1193	0.04278	0.17667	0.99331	0.29986	0.60743
1.1492	0.05318	0.19914	0.99385	0.32615	0.6296
1.1792	0.0648	0.222	0.99434	0.352	0.65037
1.2092	0.07756	0.24508	0.99477	0.37728	0.66979
1.2392	0.09141	0.26826	0.99516	0.40193	0.688
1.2692	0.10639	0.29161	0.99551	0.42601	0.70516
1.2991	0.12247	0.31507	0.99583	0.44952	0.72135
1.3291	0.13934	0.33825	0.99611	0.47221	0.73649
1.3591	0.15687	0.36103	0.99638	0.49404	0.75064
1.3891	0.17495	0.38335	0.99661	0.51501	0.76387
1.4191	0.19343	0.40513	0.99683	0.53513	0.77624
1.449	0.21224	0.42634	0.99703	0.5544	0.78781
1.479	0.23128	0.44697	0.99721	0.57287	0.79866
1.509	0.25055	0.46709	0.99739	0.59064	0.80886
1.539	0.26995	0.48663	0.99755	0.6077	0.81844
1.569	0.28928	0.5055	0.9977	0.62397	0.82742
1.5989	0.3085	0.52371	0.99784	0.63949	0.83585
1.6289	0.32755	0.54125	0.99797	0.65428	0.84376
1.6589	0.34636	0.55814	0.99809	0.66837	0.85119
1.6889	0.36489	0.57437	0.9982	0.6818	0.85817
1.7189	0.3831	0.58996	0.9983	0.69458	0.86473
1.7488	0.40109	0.60504	0.99839	0.70683	0.87094
1.7788	0.41879	0.61958	0.99848	0.71853	0.8768
1.8088	0.43612	0.63355	0.99856	0.7297	0.88233
1.8388	0.45303	0.64695	0.99864	0.74033	0.88755
1.8688	0.46951	0.65979	0.99871	0.75046	0.89247
1.8987	0.48555	0.67209	0.99878	0.7601	0.89711
1.9287	0.50114	0.68388	0.99884	0.76928	0.9015
1.9587	0.51628	0.69517	0.9989	0.77804	0.90564
1.9887	0.53097	0.70598	0.99895	0.78638	0.90956
2.0187	0.54512	0.71626	0.999	0.79428	0.91325
2.0486	0.55896	0.7262	0.99905	0.80188	0.91677
2.0786	0.57242	0.73577	0.9991	0.80915	0.92012
2.1086	0.58546	0.74494	0.99914	0.81609	0.92329
2.1386	0.59809	0.75374	0.99918	0.82273	0.92631
2.1686	0.61031	0.76217	0.99922	0.82906	0.92917
2.1985	0.62213	0.77026	0.99925	0.83512	0.93189
2.2285	0.63357	0.77801	0.99929	0.84091	0.93447
2.2585	0.64463	0.78545	0.99932	0.84644	0.93693
2.2885	0.65532	0.79259	0.99935	0.85174	0.93927
2.3185	0.66565	0.79944	0.99937	0.85681	0.9415
2.3484	0.67564	0.80601	0.9994	0.86166	0.94363
2.3784	0.68529	0.81232	0.99943	0.8663	0.94566
2.4084	0.69461	0.81838	0.99945	0.87075	0.94759
2.4384	0.70362	0.8242	0.99947	0.87501	0.94943
2.4684	0.71231	0.82979	0.99949	0.87909	0.95119
2.4983	0.72071	0.83516	0.99951	0.88301	0.95287
2.5283	0.72883	0.84032	0.99953	0.88677	0.95448
2.5583	0.73667	0.84528	0.99955	0.89037	0.95602
2.5883	0.74424	0.85005	0.99957	0.89383	0.95749
2.6183	0.75155	0.85463	0.99959	0.89715	0.95889
2.6482	0.75863	0.85904	0.9996	0.90033	0.96024
2.6782	0.76545	0.86329	0.99962	0.9034	0.96153
2.7082	0.77205	0.86737	0.99963	0.90634	0.96276
2.7382	0.77842	0.8713	0.99964	0.90917	0.96395
2.7682	0.78458	0.87509	0.99966	0.91189	0.96508
2.7981	0.79053	0.87873	0.99967	0.91451	0.96617
2.8281	0.79629	0.88224	0.99968	0.91702	0.96722
2.8581	0.80185	0.88563	0.99969	0.91945	0.96822
2.8881	0.80723	0.88889	0.9997	0.92178	0.96919
2.9181	0.81243	0.89204	0.99971	0.92403	0.97011
2.948	0.81746	0.89507	0.99972	0.9262	0.971
2.978	0.82232	0.89799	0.99973	0.92828	0.97186
3.008	0.82703	0.90082	0.99974	0.93029	0.97268
3.038	0.83158	0.90354	0.99975	0.93223	0.97348
3.068	0.83599	0.90617	0.99976	0.9341	0.97424
3.0979	0.84025	0.90871	0.99976	0.93591	0.97497
3.1279	0.84438	0.91116	0.99977	0.93765	0.97568
3.1579	0.84837	0.91353	0.99978	0.93933	0.97636
3.1879	0.85224	0.91582	0.99978	0.94095	0.97702
3.2179	0.8399	0.9085	0.99979	0.94252	0.97765
3.2478	0.84382	0.91083	0.9998	0.94404	0.97826
3.2778	0.84762	0.91308	0.9998	0.9455	0.97885
3.3078	0.8513	0.91526	0.99981	0.94691	0.97942
3.3378	0.85487	0.91737	0.99981	0.94828	0.97997
3.3678	0.85834	0.91942	0.99982	0.9496	0.9805
3.3977	0.8617	0.9214	0.99982	0.95088	0.98101
3.4277	0.86496	0.92331	0.99983	0.95212	0.9815
3.4577	0.86813	0.92517	0.99983	0.95332	0.98198
3.4877	0.8712	0.92697	0.99984	0.95448	0.98244
3.5177	0.87419	0.92872	0.99984	0.9556	0.98289
3.5476	0.87709	0.93041	0.99985	0.95669	0.98332
3.5776	0.87991	0.93205	0.99985	0.95775	0.98374
3.6076	0.88264	0.93364	0.99985	0.95877	0.98414
3.6376	0.8853	0.93519	0.99986	0.95976	0.98454
3.6676	0.88788	0.93669	0.99986	0.96072	0.98491
3.6975	0.89039	0.93815	0.99987	0.96165	0.98528
3.7275	0.89283	0.93956	0.99987	0.96255	0.98564
3.7575	0.8952	0.94093	0.99987	0.96342	0.98598
3.7875	0.89751	0.94226	0.99987	0.96427	0.98631
3.8175	0.89975	0.94356	0.99988	0.9651	0.98664
3.8474	0.90193	0.94481	0.99988	0.9659	0.98695
3.8774	0.90405	0.94603	0.99988	0.96667	0.98726
3.9074	0.90611	0.94722	0.99989	0.96743	0.98755
3.9374	0.90812	0.94837	0.99989	0.96816	0.98784
3.9674	0.91007	0.94949	0.99989	0.96887	0.98811
3.9973	0.91198	0.95059	0.99989	0.96956	0.98838
4.0273	0.91383	0.95165	0.9999	0.97023	0.98864
4.0573	0.91564	0.95268	0.9999	0.97089	0.98889
4.0873	0.91739	0.95368	0.9999	0.97152	0.98914
4.1173	0.91909	0.95466	0.9999	0.97214	0.98938
4.1472	0.92076	0.95561	0.9999	0.97274	0.98961
4.1772	0.92237	0.95653	0.99991	0.97332	0.98984
4.2072	0.92395	0.95743	0.99991	0.97388	0.99006
4.2372	0.92548	0.9583	0.99991	0.97443	0.99027
4.2672	0.92698	0.95915	0.99991	0.97497	0.99048
4.2971	0.92843	0.95998	0.99991	0.97549	0.99068
4.3271	0.92985	0.96079	0.99991	0.976	0.99088
4.3571	0.93123	0.96157	0.99992	0.97649	0.99107
4.3871	0.93258	0.96234	0.99992	0.97697	0.99125
4.4171	0.9339	0.96308	0.99992	0.97744	0.99143
4.447	0.93518	0.96381	0.99992	0.97789	0.99161
4.477	0.93643	0.96452	0.99992	0.97834	0.99178
4.507	0.93765	0.96521	0.99992	0.97877	0.99195
4.537	0.93883	0.96588	0.99992	0.97919	0.99211
4.567	0.93999	0.96654	0.99992	0.9796	0.99227
4.5969	0.94112	0.96718	0.99993	0.98	0.99242
4.6269	0.94223	0.9678	0.99993	0.98039	0.99257
4.6569	0.9433	0.96841	0.99993	0.98077	0.99272
4.6869	0.94435	0.969	0.99993	0.98114	0.99286
4.7169	0.94538	0.96958	0.99993	0.9815	0.993
4.7468	0.94638	0.97014	0.99993	0.98185	0.99313
4.7768	0.94736	0.9707	0.99993	0.98219	0.99326
4.8068	0.94831	0.97123	0.99993	0.98253	0.99339
4.8368	0.94925	0.97176	0.99993	0.98286	0.99352
4.8668	0.95016	0.97227	0.99994	0.98317	0.99364
4.8967	0.95105	0.97277	0.99994	0.98348	0.99376
4.9267	0.95192	0.97326	0.99994	0.98379	0.99388
4.9567	0.95277	0.97374	0.99994	0.98408	0.99399
4.9867	0.9536	0.97421	0.99994	0.98437	0.9941
5.0167	0.95441	0.97466	0.99994	0.98466	0.99421
5.0466	0.9552	0.97511	0.99994	0.98493	0.99431
5.0766	0.95598	0.97554	0.99994	0.9852	0.99442
5.1066	0.95673	0.97597	0.99994	0.98546	0.99452
5.1366	0.95747	0.97638	0.99994	0.98572	0.99461
5.1666	0.9582	0.97679	0.99994	0.98597	0.99471
5.1965	0.95891	0.97718	0.99994	0.98622	0.9948
5.2265	0.9596	0.97757	0.99994	0.98646	0.99489
5.2565	0.96028	0.97795	0.99995	0.98669	0.99498
5.2865	0.96094	0.97832	0.99995	0.98692	0.99507
5.3165	0.96159	0.97869	0.99995	0.98714	0.99516
5.3464	0.96222	0.97904	0.99995	0.98736	0.99524
5.3764	0.96284	0.97939	0.99995	0.98758	0.99532
5.4064	0.96345	0.97973	0.99995	0.98779	0.9954
5.4364	0.96405	0.98006	0.99995	0.98799	0.99548
5.4664	0.96463	0.98039	0.99995	0.98819	0.99556
5.4963	0.9652	0.98071	0.99995	0.98839	0.99563
5.5263	0.96576	0.98102	0.99995	0.98858	0.9957
5.5563	0.9663	0.98132	0.99995	0.98877	0.99577
5.5863	0.96684	0.98162	0.99995	0.98895	0.99584
5.6163	0.96736	0.98192	0.99995	0.98913	0.99591
5.6462	0.96788	0.9822	0.99995	0.98931	0.99598
5.6762	0.96838	0.98248	0.99995	0.98948	0.99604
5.7062	0.96887	0.98276	0.99995	0.98965	0.99611
5.7362	0.96936	0.98303	0.99995	0.98981	0.99617
5.7662	0.96983	0.98329	0.99995	0.98997	0.99623
5.7961	0.97029	0.98355	0.99995	0.99013	0.99629
5.8261	0.97075	0.9838	0.99995	0.99029	0.99635
5.8561	0.97119	0.98405	0.99995	0.99044	0.99641
5.8861	0.97163	0.9843	0.99996	0.99059	0.99646
5.9161	0.97206	0.98453	0.99996	0.99073	0.99652
5.946	0.97248	0.98477	0.99996	0.99087	0.99657
5.976	0.97289	0.985	0.99996	0.99101	0.99663
6.006	0.97329	0.98522	0.99996	0.99115	0.99668
6.036	0.97369	0.98544	0.99996	0.99129	0.99673
6.066	0.97407	0.98566	0.99996	0.99142	0.99678
6.0959	0.97446	0.98587	0.99996	0.99155	0.99683
6.1259	0.97483	0.98608	0.99996	0.99167	0.99688
6.1559	0.97519	0.98628	0.99996	0.9918	0.99692
6.1859	0.97555	0.98648	0.99996	0.99192	0.99697
6.2159	0.97591	0.98668	0.99996	0.99204	0.99701
6.2458	0.97625	0.98687	0.99996	0.99216	0.99706
6.2758	0.97659	0.98706	0.99996	0.99227	0.9971
6.3058	0.97692	0.98724	0.99996	0.99238	0.99714
6.3358	0.97725	0.98742	0.99996	0.99249	0.99719
6.3658	0.97757	0.9876	0.99996	0.9926	0.99723
6.3957	0.97789	0.98778	0.99996	0.99271	0.99727
6.4257	0.9782	0.98795	0.99996	0.99281	0.99731
6.4557	0.9785	0.98812	0.99996	0.99292	0.99734
6.4857	0.9788	0.98828	0.99996	0.99302	0.99738
6.5157	0.97909	0.98844	0.99996	0.99311	0.99742
6.5456	0.97938	0.9886	0.99996	0.99321	0.99746
6.5756	0.97966	0.98876	0.99996	0.99331	0.99749
6.6056	0.97994	0.98891	0.99996	0.9934	0.99753
6.6356	0.98021	0.98907	0.99996	0.99349	0.99756
6.6656	0.98048	0.98921	0.99996	0.99358	0.99759
6.6955	0.98074	0.98936	0.99996	0.99367	0.99763
6.7255	0.981	0.9895	0.99996	0.99376	0.99766
6.7555	0.98125	0.98964	0.99996	0.99384	0.99769
6.7855	0.9815	0.98978	0.99996	0.99392	0.99772
6.8155	0.98174	0.98992	0.99996	0.99401	0.99775
6.8454	0.98199	0.99005	0.99996	0.99409	0.99779
6.8754	0.98222	0.99018	0.99996	0.99417	0.99781
6.9054	0.98245	0.99031	0.99996	0.99424	0.99784
6.9354	0.98268	0.99044	0.99996	0.99432	0.99787
6.9654	0.98291	0.99056	0.99996	0.9944	0.9979
6.9953	0.98313	0.99068	0.99996	0.99447	0.99793
7.0253	0.98334	0.9908	0.99996	0.99454	0.99796
7.0553	0.98356	0.99092	0.99996	0.99461	0.99798
7.0853	0.98377	0.99104	0.99996	0.99468	0.99801
7.1153	0.98397	0.99115	0.99996	0.99475	0.99803
7.1452	0.98418	0.99127	0.99996	0.99482	0.99806
7.1752	0.98438	0.99138	0.99996	0.99489	0.99809
7.2052	0.98457	0.99148	0.99996	0.99495	0.99811
7.2352	0.98476	0.99159	0.99996	0.99502	0.99813
7.2652	0.98495	0.9917	0.99997	0.99508	0.99816
7.2951	0.98514	0.9918	0.99997	0.99514	0.99818
7.3251	0.98533	0.9919	0.99997	0.9952	0.9982
7.3551	0.98551	0.992	0.99997	0.99526	0.99823
7.3851	0.98568	0.9921	0.99997	0.99532	0.99825
7.4151	0.98586	0.9922	0.99997	0.99538	0.99827
7.445	0.98603	0.99229	0.99997	0.99544	0.99829
7.475	0.9862	0.99239	0.99997	0.9955	0.99831
7.505	0.98637	0.99248	0.99997	0.99555	0.99833
7.535	0.98653	0.99257	0.99997	0.99561	0.99835
7.565	0.98669	0.99266	0.99997	0.99566	0.99837
7.5949	0.98685	0.99275	0.99997	0.99571	0.99839
7.6249	0.98701	0.99283	0.99997	0.99576	0.99841
7.6549	0.98716	0.99292	0.99997	0.99581	0.99843
7.6849	0.98731	0.993	0.99997	0.99587	0.99845
7.7149	0.98746	0.99308	0.99997	0.99591	0.99847
7.7448	0.98761	0.99317	0.99997	0.99596	0.99849
7.7748	0.98775	0.99325	0.99997	0.99601	0.99851
7.8048	0.9879	0.99332	0.99997	0.99606	0.99852
7.8348	0.98804	0.9934	0.99997	0.99611	0.99854
7.8648	0.98817	0.99348	0.99997	0.99615	0.99856
7.8947	0.98831	0.99355	0.99997	0.9962	0.99857
7.9247	0.98844	0.99363	0.99997	0.99624	0.99859
7.9547	0.98858	0.9937	0.99997	0.99628	0.99861
7.9847	0.98871	0.99377	0.99997	0.99633	0.99862
8.0147	0.98883	0.99384	0.99997	0.99637	0.99864
8.0446	0.98896	0.99391	0.99997	0.99641	0.99865
8.0746	0.98908	0.99398	0.99997	0.99645	0.99867
8.1046	0.98921	0.99405	0.99997	0.99649	0.99868
8.1346	0.98933	0.99412	0.99997	0.99653	0.9987
8.1646	0.98945	0.99418	0.99997	0.99657	0.99871
8.1945	0.98956	0.99425	0.99997	0.99661	0.99873
8.2245	0.98968	0.99431	0.99997	0.99665	0.99874
8.2545	0.98979	0.99437	0.99997	0.99669	0.99876
8.2845	0.9899	0.99443	0.99997	0.99672	0.99877
8.3145	0.99001	0.9945	0.99997	0.99676	0.99878
8.3444	0.99012	0.99456	0.99997	0.99679	0.9988
8.3744	0.99023	0.99462	0.99997	0.99683	0.99881
8.4044	0.99034	0.99467	0.99997	0.99687	0.99882
8.4344	0.99044	0.99473	0.99997	0.9969	0.99884
8.4644	0.99054	0.99479	0.99997	0.99693	0.99885
8.4943	0.99064	0.99484	0.99997	0.99697	0.99886
8.5243	0.99074	0.9949	0.99997	0.997	0.99887
8.5543	0.99084	0.99495	0.99997	0.99703	0.99888
8.5843	0.99094	0.99501	0.99997	0.99706	0.9989
8.6143	0.99104	0.99506	0.99997	0.9971	0.99891
8.6442	0.99113	0.99511	0.99997	0.99713	0.99892
8.6742	0.99122	0.99516	0.99997	0.99716	0.99893
8.7042	0.99132	0.99521	0.99997	0.99719	0.99894
8.7342	0.99141	0.99526	0.99997	0.99722	0.99895
8.7642	0.99149	0.99531	0.99997	0.99725	0.99896
8.7941	0.99158	0.99536	0.99997	0.99727	0.99897
8.8241	0.99167	0.99541	0.99997	0.9973	0.99899
8.8541	0.99176	0.99546	0.99997	0.99733	0.999
8.8841	0.99184	0.9955	0.99997	0.99736	0.99901
8.9141	0.99192	0.99555	0.99997	0.99739	0.99902
8.944	0.99201	0.99559	0.99997	0.99741	0.99903
8.974	0.99209	0.99564	0.99997	0.99744	0.99904
9.004	0.99217	0.99568	0.99997	0.99747	0.99905
9.034	0.99225	0.99573	0.99997	0.99749	0.99906
9.064	0.99232	0.99577	0.99997	0.99752	0.99906
9.0939	0.9924	0.99581	0.99997	0.99754	0.99907
9.1239	0.99248	0.99585	0.99997	0.99757	0.99908
9.1539	0.99255	0.9959	0.99997	0.99759	0.99909
9.1839	0.99262	0.99594	0.99997	0.99762	0.9991
9.2139	0.9927	0.99598	0.99997	0.99764	0.99911
9.2438	0.99277	0.99602	0.99997	0.99766	0.99912
9.2738	0.99284	0.99606	0.99997	0.99769	0.99913
9.3038	0.99291	0.99609	0.99997	0.99771	0.99914
9.3338	0.99298	0.99613	0.99997	0.99773	0.99914
9.3638	0.99305	0.99617	0.99997	0.99775	0.99915
9.3937	0.99311	0.99621	0.99997	0.99778	0.99916
9.4237	0.99318	0.99624	0.99997	0.9978	0.99917
9.4537	0.99325	0.99628	0.99997	0.99782	0.99918
9.4837	0.99331	0.99632	0.99997	0.99784	0.99918
9.5137	0.99338	0.99635	0.99997	0.99786	0.99919
9.5436	0.99344	0.99639	0.99997	0.99788	0.9992
9.5736	0.9935	0.99642	0.99997	0.9979	0.99921
9.6036	0.99356	0.99645	0.99997	0.99792	0.99921
9.6336	0.99362	0.99649	0.99997	0.99794	0.99922
9.6636	0.99368	0.99652	0.99997	0.99796	0.99923
9.6935	0.99374	0.99655	0.99997	0.99798	0.99924
9.7235	0.9938	0.99659	0.99997	0.998	0.99924
9.7535	0.99386	0.99662	0.99997	0.99802	0.99925
9.7835	0.99392	0.99665	0.99997	0.99804	0.99926
9.8135	0.99397	0.99668	0.99997	0.99806	0.99926
9.8434	0.99403	0.99671	0.99997	0.99807	0.99927
9.8734	0.99408	0.99674	0.99997	0.99809	0.99928
9.9034	0.99414	0.99677	0.99997	0.99811	0.99928
9.9334	0.99419	0.9968	0.99997	0.99813	0.99929
9.9634	0.99424	0.99683	0.99997	0.99814	0.9993
9.9933	0.9943	0.99686	0.99997	0.99816	0.9993
10.023	0.99435	0.99689	0.99997	0.99818	0.99931
10.053	0.9944	0.99692	0.99997	0.99819	0.99931
10.083	0.99445	0.99694	0.99997	0.99821	0.99932
10.113	0.9945	0.99697	0.99997	0.99823	0.99933
10.143	0.99455	0.997	0.99997	0.99824	0.99933
10.173	0.9946	0.99702	0.99997	0.99826	0.99934
10.203	0.99465	0.99705	0.99997	0.99827	0.99934
10.233	0.99469	0.99708	0.99997	0.99829	0.99935
10.263	0.99474	0.9971	0.99997	0.9983	0.99936
10.293	0.99479	0.99713	0.99997	0.99832	0.99936
10.323	0.99483	0.99715	0.99997	0.99833	0.99937
10.353	0.99488	0.99718	0.99997	0.99835	0.99937
10.383	0.99492	0.9972	0.99997	0.99836	0.99938
10.413	0.99497	0.99723	0.99997	0.99838	0.99938
10.443	0.99501	0.99725	0.99997	0.99839	0.99939
10.473	0.99505	0.99728	0.99997	0.99841	0.99939
10.503	0.9951	0.9973	0.99997	0.99842	0.9994
10.533	0.99514	0.99732	0.99997	0.99843	0.9994
10.563	0.99518	0.99735	0.99997	0.99845	0.99941
10.593	0.99522	0.99737	0.99997	0.99846	0.99941
10.623	0.99526	0.99739	0.99997	0.99847	0.99942
10.653	0.9953	0.99741	0.99997	0.99849	0.99942
10.683	0.99534	0.99744	0.99997	0.9985	0.99943
10.713	0.99538	0.99746	0.99997	0.99851	0.99943
10.743	0.99542	0.99748	0.99997	0.99853	0.99944
10.773	0.99546	0.9975	0.99997	0.99854	0.99944
10.803	0.9955	0.99752	0.99997	0.99855	0.99945
10.833	0.99553	0.99754	0.99997	0.99856	0.99945
10.863	0.99557	0.99756	0.99997	0.99857	0.99945
10.893	0.99561	0.99758	0.99997	0.99859	0.99946
10.923	0.99565	0.9976	0.99997	0.9986	0.99946
10.953	0.99568	0.99762	0.99997	0.99861	0.99947
10.983	0.99572	0.99764	0.99997	0.99862	0.99947
11.013	0.99575	0.99766	0.99997	0.99863	0.99948
11.043	0.99579	0.99768	0.99997	0.99864	0.99948
11.073	0.99582	0.9977	0.99997	0.99865	0.99948
11.103	0.99585	0.99772	0.99997	0.99867	0.99949
11.133	0.99589	0.99774	0.99997	0.99868	0.99949
11.163	0.99592	0.99775	0.99997	0.99869	0.9995
11.193	0.99595	0.99777	0.99997	0.9987	0.9995
11.223	0.99599	0.99779	0.99997	0.99871	0.9995
11.252	0.99602	0.99781	0.99997	0.99872	0.99951
11.282	0.99605	0.99783	0.99997	0.99873	0.99951
11.312	0.99608	0.99784	0.99997	0.99874	0.99951
11.342	0.99611	0.99786	0.99997	0.99875	0.99952
11.372	0.99614	0.99788	0.99997	0.99876	0.99952
11.402	0.99618	0.99789	0.99997	0.99877	0.99953
11.432	0.99621	0.99791	0.99997	0.99878	0.99953
11.462	0.99624	0.99793	0.99997	0.99879	0.99953
11.492	0.99626	0.99794	0.99997	0.9988	0.99954
11.522	0.99629	0.99796	0.99997	0.99881	0.99954
11.552	0.99632	0.99798	0.99997	0.99882	0.99954
11.582	0.99635	0.99799	0.99997	0.99882	0.99955
11.612	0.99638	0.99801	0.99997	0.99883	0.99955
11.642	0.99641	0.99802	0.99997	0.99884	0.99955
11.672	0.99644	0.99804	0.99997	0.99885	0.99956
11.702	0.99646	0.99805	0.99997	0.99886	0.99956
11.732	0.99649	0.99807	0.99997	0.99887	0.99956
11.762	0.99652	0.99808	0.99997	0.99888	0.99957
11.792	0.99654	0.9981	0.99997	0.99889	0.99957
11.822	0.99657	0.99811	0.99997	0.99889	0.99957
11.852	0.9966	0.99813	0.99997	0.9989	0.99957
11.882	0.99662	0.99814	0.99997	0.99891	0.99958
11.912	0.99665	0.99815	0.99997	0.99892	0.99958
11.942	0.99667	0.99817	0.99997	0.99893	0.99958
11.972	0.9967	0.99818	0.99997	0.99894	0.99959
12.002	0.99672	0.9982	0.99997	0.99894	0.99959
12.032	0.99675	0.99821	0.99997	0.99895	0.99959
12.062	0.99677	0.99822	0.99997	0.99896	0.99959
12.092	0.99679	0.99824	0.99997	0.99897	0.9996
12.122	0.99682	0.99825	0.99997	0.99897	0.9996
12.152	0.99684	0.99826	0.99997	0.99898	0.9996
12.182	0.99686	0.99827	0.99997	0.99899	0.99961
12.212	0.99689	0.99829	0.99997	0.999	0.99961
12.242	0.99691	0.9983	0.99997	0.999	0.99961
12.272	0.99693	0.99831	0.99997	0.99901	0.99961
12.302	0.99695	0.99832	0.99997	0.99902	0.99962
12.332	0.99698	0.99834	0.99997	0.99903	0.99962
12.362	0.997	0.99835	0.99997	0.99903	0.99962
12.392	0.99702	0.99836	0.99997	0.99904	0.99962
12.422	0.99704	0.99837	0.99997	0.99905	0.99963
12.452	0.99706	0.99838	0.99997	0.99905	0.99963
12.482	0.99708	0.9984	0.99997	0.99906	0.99963
12.512	0.9971	0.99841	0.99997	0.99907	0.99963
12.542	0.99713	0.99842	0.99997	0.99907	0.99964
12.572	0.99715	0.99843	0.99997	0.99908	0.99964
12.602	0.99717	0.99844	0.99997	0.99909	0.99964
12.632	0.99719	0.99845	0.99997	0.99909	0.99964
12.662	0.99721	0.99846	0.99997	0.9991	0.99964
12.692	0.99723	0.99847	0.99997	0.9991	0.99965
12.722	0.99724	0.99848	0.99997	0.99911	0.99965
12.752	0.99726	0.99849	0.99997	0.99912	0.99965
12.781	0.99728	0.9985	0.99997	0.99912	0.99965
12.811	0.9973	0.99851	0.99997	0.99913	0.99966
12.841	0.99732	0.99853	0.99997	0.99913	0.99966
12.871	0.99734	0.99854	0.99997	0.99914	0.99966
12.901	0.99736	0.99855	0.99997	0.99915	0.99966
12.931	0.99737	0.99856	0.99997	0.99915	0.99966
12.961	0.99739	0.99857	0.99997	0.99916	0.99967
12.991	0.99741	0.99858	0.99997	0.99916	0.99967
13.021	0.99743	0.99858	0.99997	0.99917	0.99967
13.051	0.99745	0.99859	0.99997	0.99917	0.99967
13.081	0.99746	0.9986	0.99997	0.99918	0.99967
13.111	0.99748	0.99861	0.99997	0.99919	0.99968
13.141	0.9975	0.99862	0.99997	0.99919	0.99968
13.171	0.99751	0.99863	0.99997	0.9992	0.99968
13.201	0.99753	0.99864	0.99997	0.9992	0.99968
13.231	0.99755	0.99865	0.99997	0.99921	0.99968
13.261	0.99756	0.99866	0.99997	0.99921	0.99969
13.291	0.99758	0.99867	0.99997	0.99922	0.99969
13.321	0.9976	0.99868	0.99997	0.99922	0.99969
13.351	0.99761	0.99869	0.99997	0.99923	0.99969
13.381	0.99763	0.99869	0.99997	0.99923	0.99969
13.411	0.99764	0.9987	0.99997	0.99924	0.9997
13.441	0.99766	0.99871	0.99997	0.99924	0.9997
13.471	0.99767	0.99872	0.99997	0.99925	0.9997
13.501	0.99769	0.99873	0.99997	0.99925	0.9997
13.531	0.9977	0.99874	0.99997	0.99926	0.9997
13.561	0.99772	0.99874	0.99997	0.99926	0.9997
13.591	0.99773	0.99875	0.99997	0.99927	0.99971
13.621	0.99775	0.99876	0.99997	0.99927	0.99971
13.651	0.99776	0.99877	0.99997	0.99927	0.99971
13.681	0.99778	0.99878	0.99997	0.99928	0.99971
13.711	0.99779	0.99878	0.99997	0.99928	0.99971
13.741	0.9978	0.99879	0.99997	0.99929	0.99971
13.771	0.99782	0.9988	0.99997	0.99929	0.99972
13.801	0.99783	0.99881	0.99997	0.9993	0.99972
13.831	0.99785	0.99881	0.99997	0.9993	0.99972
13.861	0.99786	0.99882	0.99997	0.99931	0.99972
13.891	0.99787	0.99883	0.99997	0.99931	0.99972
13.921	0.99789	0.99884	0.99997	0.99931	0.99972
13.951	0.9979	0.99884	0.99997	0.99932	0.99972
13.981	0.99791	0.99885	0.99997	0.99932	0.99973
14.011	0.99793	0.99886	0.99997	0.99933	0.99973
14.041	0.99794	0.99887	0.99997	0.99933	0.99973
14.071	0.99795	0.99887	0.99997	0.99933	0.99973
14.101	0.99796	0.99888	0.99997	0.99934	0.99973
14.131	0.99798	0.99889	0.99997	0.99934	0.99973
14.161	0.99799	0.99889	0.99997	0.99935	0.99973
14.191	0.998	0.9989	0.99997	0.99935	0.99974
14.221	0.99801	0.99891	0.99997	0.99935	0.99974
14.251	0.99803	0.99891	0.99997	0.99936	0.99974
14.28	0.99804	0.99892	0.99997	0.99936	0.99974
14.31	0.99805	0.99893	0.99997	0.99937	0.99974
14.34	0.99806	0.99893	0.99997	0.99937	0.99974
14.37	0.99807	0.99894	0.99997	0.99937	0.99974
14.4	0.99808	0.99895	0.99997	0.99938	0.99975
14.43	0.9981	0.99895	0.99997	0.99938	0.99975
14.46	0.99811	0.99896	0.99997	0.99938	0.99975
14.49	0.99812	0.99896	0.99997	0.99939	0.99975
14.52	0.99813	0.99897	0.99997	0.99939	0.99975
14.55	0.99814	0.99898	0.99997	0.99939	0.99975
14.58	0.99815	0.99898	0.99997	0.9994	0.99975
14.61	0.99816	0.99899	0.99997	0.9994	0.99975
14.64	0.99817	0.99899	0.99997	0.9994	0.99976
14.67	0.99818	0.999	0.99997	0.99941	0.99976
14.7	0.99819	0.99901	0.99997	0.99941	0.99976
14.73	0.9982	0.99901	0.99997	0.99941	0.99976
14.76	0.99822	0.99902	0.99997	0.99942	0.99976
14.79	0.99823	0.99902	0.99997	0.99942	0.99976
14.82	0.99824	0.99903	0.99997	0.99942	0.99976
14.85	0.99825	0.99903	0.99997	0.99943	0.99976
14.88	0.99826	0.99904	0.99997	0.99943	0.99976
14.91	0.99827	0.99905	0.99997	0.99943	0.99977
14.94	0.99828	0.99905	0.99997	0.99944	0.99977
14.97	0.99829	0.99906	0.99997	0.99944	0.99977
15	0.9983	0.99906	0.99997	0.99944	0.99977

## Sheet: Fig 7
Table S7: Data for Figure 7
Unit PC1		Unit PC2		Unit 1		Unit 2
Pressure (mbar)	Norm. Si conc. (wt)	Pressure (mbar)	Norm. Si conc. (wt)	Pressure (mbar)	Norm. Si conc. (wt)	Pressure (mbar)	Norm. Si conc. (wt)
955	1	953	1	950	1	950	1
834.333	1.00247	844.333	0.98755	820	1.19301	850	1.13986
726	1.00346	744.6	0.98675	680	1.34403	750	1.28775
633	1.0094	556.667	0.97735	550	1.50484	650	1.38222
524.667	1.00593	448	0.96674			550	1.50209
